# Supplementary material for: Uncovering the pharmacology of Ginkgo biloba folium in the cell-type-specific targets of Parkinson’s disease
Source: Front Pharmacol. 2022 Sep 29;13:1007556. doi: 10.3389/fphar.2022.1007556 (PMC9556873; doi:10.3389/fphar.2022.1007556)
Supplement: Supplementary file 1 [file Table1.XLS]

## Sheet: Sheet1
Table 1. Chemical Information and ADMET features of GBF components.
PubChem CID	Molecule Name	SMILES	Molecule properties									Absorption							Distribution				Metabolism							Excretion		Toxicity
			MW(g/mol)	AlogP	LogP	Num.Hdon	Num. Hacc	Num. rotatable bonds	TPSA(Å²)	SAscore	OB(%)	Water solubility	Caco2 permeability	Intestinal absorption (human)	Skin Permeability	P-glycoprotein substrate	P-glycoprotein I inhibitor	P-glycoprotein II inhibitor	VDss (human)	Fraction unbound (human)	BBB permeability	CNS permeability	CYP2D6 substrate	CYP3A4 substrate	CYP1A2 inhibitior	CYP2C19 inhibitior	CYP2C9 inhibitior	CYP2D6 inhibitior	CYP3A4 inhibitior	Total Clearance	Renal OCT2 substrate	AMES toxicity	Max. tolerated dose (human)	hERG I inhibitor	hERG II inhibitor	Oral Rat Acute Toxicity (LD50)	Oral Rat Chronic Toxicity (LOAEL)	Hepatotoxicity	Skin Sensitisation	T.Pyriformis toxicity	Min0w toxicity
9154	Fluoranthene	C1=CC=C2C(=C1)C3=CC=CC4=C3C2=CC=C4	202.26	3.95	4.53	0	0	0	0	1.576	24.7	-6.812	1.391	97.21	-2.667	Yes	No	Yes	0.557	0.163	0.605	-1.19	No	Yes	Yes	Yes	No	No	No	0.111	No	Yes	0.588	No	Yes	2.106	1.09	No	Yes	0.539	-1.438
31423	Pyrene	C1=CC2=C3C(=C1)C=CC4=CC=CC(=C43)C=C2	202.26	3.95	4.46	0	0	0	0	1.442	25.05	-6.824	1.393	96.726	-2.663	Yes	No	No	0.558	0.159	0.593	-1.181	No	Yes	Yes	Yes	No	No	No	0.098	No	Yes	0.593	No	Yes	1.978	1.11	No	Yes	0.602	-1.382
72307	Sesamin	C1C2C(COC2C3=CC4=C(C=C3)OCO4)C(O1)C5=CC6=C(C=C5)OCO6	354.38	2.24	2.79	0	6	2	55.38	3.774	56.55	-4.223	1.399	97.81	-2.772	No	Yes	No	-0.17	0	-0.862	-2.939	No	Yes	Yes	Yes	Yes	No	Yes	-0.126	No	Yes	0.089	No	No	2.883	1.568	No	No	0.34	0.039
73160	Catechin	C1C(C(OC2=CC(=CC(=C21)O)O)C3=CC(=C(C=C3)O)O)O	290.29	1.92	0.85	5	6	1	110.38	3.344	49.68	-3.117	-0.283	68.829	-2.735	Yes	No	No	1.027	0.235	-1.054	-3.298	No	No	No	No	No	No	No	0.183	No	No	0.438	No	No	2.428	2.5	No	No	0.347	3.585
73581	Bilobalide	CC(C)(C)[C@@]1(C[C@H]2[C@@]3([C@]14[C@H](C(=O)O[C@H]4OC3=O)O)CC(=O)O2)O	326.33	-0.53	0.16	2	8	1	119.36	5.738	84.42	-3.562	0.821	72.188	-2.838	No	No	No	0.386	0.507	-0.302	-3.092	No	No	No	No	No	No	No	0.703	No	No	0.305	No	No	2.087	3.196	No	No	0.286	3.298
128861	Cyanidol	C1=CC(=C(C=C1C2=[O+]C3=CC(=CC(=C3C=C2O)O)O)O)O	287.26	1.67	0.32	5	6	1	114.29	3.038	1.36	-2.935	-0.35	87.303	-2.735	Yes	No	No	0.952	0.243	-1.234	-2.218	No	No	Yes	No	No	No	No	0.532	No	No	0.497	No	No	2.464	2.542	No	No	0.29	2.548
5280343	Quercetin	C1=CC(=C(C=C1C2=C(C(=O)C3=C(C=C(C=C3O2)O)O)O)O)O	302.25	1.5	1.23	5	7	1	131.36	2.545	46.43	-2.925	-0.229	77.207	-2.735	Yes	No	No	1.559	0.206	-1.098	-3.065	No	No	Yes	No	No	No	No	0.407	No	No	0.499	No	No	2.471	2.612	No	No	0.288	3.721
5280443	Apigenin	C1=CC(=CC=C1C2=CC(=O)C3=C(C=C(C=C3O2)O)O)O	270.25	2.33	2.11	3	5	1	90.9	2.253	23.06	-3.329	1.007	93.25	-2.735	Yes	No	No	0.822	0.147	-0.734	-2.061	No	No	Yes	Yes	No	No	No	0.566	No	No	0.328	No	No	2.45	2.298	No	No	0.38	2.432
5280445	Luteolin	C1=CC(=C(C=C1C2=CC(=O)C3=C(C=C(C=C3O2)O)O)O)O	286.25	2.07	1.73	4	6	1	111.13	2.42	36.16	-3.094	0.096	81.13	-2.735	Yes	No	No	1.153	0.168	-0.907	-2.251	No	No	Yes	No	Yes	No	No	0.495	No	No	0.499	No	No	2.455	2.409	No	No	0.326	3.169
5280666	Chryseriol	COC1=C(C=CC(=C1)C2=CC(=O)C3=C(C=C(C=C3O2)O)O)O	300.28	2.32	2.18	3	6	2	100.13	2.329	35.85	-3.237	0.321	82.844	-2.735	Yes	No	No	0.741	0.07	-0.943	-2.32	No	No	Yes	Yes	Yes	No	No	0.597	No	No	0.436	No	No	2.337	2.252	No	No	0.331	1.654
5280704	Cosmetin	C1=CC(=CC=C1C2=CC(=O)C3=C(C=C(C=C3O2)O[C@H]4[C@@H]([C@H]([C@@H]([C@H](O4)CO)O)O)O)O)O	432.41	0.43	0.52	6	10	4	170.05	3.804	9.68	-2.559	0.33	37.609	-2.735	Yes	No	No	0.342	0.218	-1.391	-3.746	No	No	No	No	No	No	No	0.547	No	No	0.515	No	No	2.595	4.359	No	No	0.285	5.507
5280863	Kaempferol	C1=CC(=CC=C1C2=C(C(=O)C3=C(C=C(C=C3O2)O)O)O)O	286.25	1.77	1.68	4	6	1	111.13	2.375	41.88	-3.04	0.032	74.29	-2.735	Yes	No	No	1.274	0.178	-0.939	-2.228	No	No	Yes	No	No	No	No	0.477	No	No	0.531	No	No	2.449	2.505	No	No	0.312	2.885
5281612	Diosmetin	COC1=C(C=C(C=C1)C2=CC(=O)C3=C(C=C(C=C3O2)O)O)O	300.28	2.32	2.19	3	6	2	100.13	2.346	31.14	-3.238	0.326	79.898	-2.735	Yes	No	No	0.709	0.068	-0.954	-2.316	No	No	Yes	Yes	Yes	No	No	0.598	No	No	0.42	No	No	2.338	2.271	No	No	0.336	1.737
5281617	Genkwanin	COC1=CC(=C2C(=C1)OC(=CC2=O)C3=CC=C(C=C3)O)O	284.28	2.59	2.5	2	5	2	79.9	2.168	37.13	-3.497	0.917	93.982	-2.746	Yes	No	No	0.011	0.096	-0.337	-2.171	No	Yes	Yes	Yes	Yes	No	No	0.617	No	No	0.032	No	No	2.238	1.79	No	No	0.498	0.599
5281654	Isorhamnetin	COC1=C(C=CC(=C1)C2=C(C(=O)C3=C(C=C(C=C3O2)O)O)O)O	316.28	1.76	1.65	4	7	2	120.36	2.453	49.6	-3	-0.003	76.014	-2.735	Yes	No	No	1.123	0.091	-1.135	-3.188	No	No	Yes	No	No	No	No	0.508	No	No	0.576	No	No	2.407	2.499	No	No	0.296	2.206
5281702	Tricin	COC1=CC(=CC(=C1O)OC)C2=CC(=O)C3=C(C=C(C=C3O2)O)O	330.31	2.3	2.15	3	7	3	109.36	2.43	27.86	-3.276	0.12	89.713	-2.735	Yes	No	No	0.798	0.084	-1.115	-3.411	No	No	Yes	Yes	No	No	No	0.62	No	No	0.351	No	No	2.229	1.82	No	No	0.329	1.754
5281953	Syringetin	COC1=CC(=CC(=C1O)OC)C2=C(C(=O)C3=C(C=C(C=C3O2)O)O)O	346.31	1.74	1.49	4	8	3	129.59	2.541	36.82	-3.042	-0.204	77.277	-2.735	Yes	No	No	1.235	0.103	-1.229	-3.562	No	No	Yes	No	No	No	No	0.527	No	No	0.532	No	No	2.31	2.352	No	No	0.295	2.687
5282154	Laricitrin	COC1=CC(=CC(=C1O)O)C2=C(C(=O)C3=C(C=C(C=C3O2)O)O)O	332.28	1.49	1.3	5	8	2	140.59	2.646	35.38	-2.937	0.213	72.877	-2.735	Yes	No	No	1.271	0.128	-1.296	-3.666	No	No	No	No	No	No	No	0.487	No	No	0.529	No	No	2.4	2.396	No	No	0.287	4.092
5318570	Isogoycyrol	CC1(CCC2=C(C=C3C(=C2O1)C4=C(C5=C(O4)C=C(C=C5)O)C(=O)O3)OC)C	366.39	4.36	3.78	1	6	1	82.04	2.959	40.36	-4.434	0.627	94.699	-2.752	Yes	Yes	Yes	0.218	0.048	-0.519	-1.719	No	Yes	Yes	Yes	Yes	No	Yes	0.586	No	No	-0.243	No	No	2.551	1.224	Yes	No	0.356	0.719
6324617	Ginkgolide B	C[C@@H]1C(=O)O[C@@H]2[C@]1([C@@]34C(=O)O[C@H]5[C@]3([C@H]2O)[C@@]6([C@@H](C5)C(C)(C)C)[C@H](C(=O)O[C@H]6O4)O)O	424.44	-0.75	-0.03	3	10	1	148.82	6.394	44.38	-3.856	0.948	57.936	-2.736	Yes	No	No	0.454	0.395	-0.575	-3.041	No	No	No	No	No	No	No	0.308	No	No	-0.941	No	No	2.636	3.566	No	No	0.285	5.122
9838882	Dihydrokaempferol	C1=CC(=CC=C1[C@H]2[C@@H](C(=O)C3=C(C=C(C=C3O2)O)O)O)O	288.27	1.75	1	4	6	1	107.22	3.404	24.15	-2.967	0.996	59.072	-2.735	Yes	No	No	1.16	0.278	-0.588	-3.014	No	No	No	No	No	No	No	-0.003	No	No	0.353	No	No	2.169	2.958	No	No	0.297	3.754
9909368	Ginkgolide A	C[C@@H]1C(=O)O[C@@H]2[C@]1([C@@]34C(=O)O[C@H]5[C@]3(C2)[C@@]6([C@@H](C5)C(C)(C)C)[C@H](C(=O)O[C@H]6O4)O)O	408.44	0.09	0.6	2	9	1	128.59	6.43	13.82	-4.21	1.126	81.401	-2.762	Yes	No	No	0.339	0.379	-0.247	-3.153	No	No	No	No	No	No	No	0.271	No	No	-0.654	No	No	2.166	3.205	No	No	0.285	3.765
12310208	Ginkgolide M	CC1C2C(C(C34C25C(=O)OC3C(C(C46C(C(=O)OC6O5)O)C(C)(C)C)O)O)OC1=O	424.44	-1.03	-0.16	3	10	1	148.82	6.243	49.09	-3.971	0.87	86.04	-2.736	Yes	No	No	0.288	0.35	-0.69	-3.122	No	No	No	No	No	No	No	0.314	No	Yes	-0.572	No	No	2.506	3.542	No	No	0.285	6.372
24721483	Ginkgolide J	C[C@@H]1C(=O)O[C@@H]2[C@]1([C@@]34C(=O)O[C@H]5C3(C2)[C@@]6([C@@H]([C@H]5O)C(C)(C)C)[C@H](C(=O)O[C@H]6O4)O)O	424.44	-0.81	-0.13	3	10	1	148.82	6.283	44.84	-3.956	0.891	64.961	-2.737	Yes	No	No	0.468	0.373	-0.527	-3.077	No	No	No	No	No	No	No	0.301	No	No	-0.944	No	No	2.598	3.657	No	No	0.285	4.909
101553595	Ginkgolide K	CC1=C2[C@H]([C@@H]([C@@]34[C@@]25C(=O)O[C@@H]3C[C@H]([C@@]46[C@H](C(=O)O[C@H]6O5)O)C(C)(C)C)O)OC1=O	406.38	0.54	0.74	2	9	1	128.59	6.278	57.99	-4.119	1.431	87.681	-2.78	Yes	No	No	0.314	0.327	-0.384	-3.029	No	No	No	No	No	No	No	0.303	No	No	-0.525	No	No	2.449	3.012	No	No	0.285	4.966
LogP: Average of five LogP predictions: iLOGP, XLOGP3, WLOGP, MLOGP and SILICOS-IT.
SAscore: Synthetic accessibility score designed to estimate ease of synthesis of drug-like molecules. SAscore>=6, difficult to synthesize.
IGC50: Tetrahymena pyriformis 50% growth inhibition concentration. The unit is (-log10[(mg/L/(1000*MW)]).
LC50FM: 96-hour fathead minnow 50% lethal concentration. The unit is (-log10[(mg/L/(1000*MW)]).
LC50DM: 48-hour draphnia magna 50% lethal concentration. The unit is (-log10[(mg/L/(1000*MW)]).
