# Supplementary material for: Uncovering the pharmacology of Ginkgo biloba folium in the cell-type-specific targets of Parkinson’s disease
Source: Front Pharmacol. 2022 Sep 29;13:1007556. doi: 10.3389/fphar.2022.1007556 (PMC9556873; doi:10.3389/fphar.2022.1007556)
Supplement: Supplementary file 3 [file Table4.XLS]

## Sheet: KEGG_Result_neuron
Table 4. KEGG pathway enrichment results.
Cell type	pathway ID	Description	GeneRatio	BgRatio	pvalue	p.adjust	qvalue	geneID	Count
neuron	hsa05215	Prostate cancer	7/22	97/8150	4.00657660195773e-09	5.95425544965279e-07	1.82273126009779e-07	2950/5594/4790/3320/5290/3480/367	7
neuron	hsa04931	Insulin resistance	7/22	108/8150	8.54226041003249e-09	5.95425544965279e-07	1.82273126009779e-07	5579/4790/6720/6774/5465/5290/3643	7
neuron	hsa04066	HIF-1 signaling pathway	7/22	109/8150	9.11365630048896e-09	5.95425544965279e-07	1.82273126009779e-07	5579/5594/4790/6774/5290/3480/3643	7
neuron	hsa05212	Pancreatic cancer	6/22	76/8150	3.56717212240041e-08	1.47407810065774e-06	4.51248398160534e-07	5594/4790/1021/6774/5290/598	6
neuron	hsa05207	Chemical carcinogenesis - receptor activation	8/22	212/8150	4.29463416570924e-08	1.47407810065774e-06	4.51248398160534e-07	5579/5594/4790/6774/3320/5465/5290/367	8
neuron	hsa01521	EGFR tyrosine kinase inhibitor resistance	6/22	79/8150	4.51248398160534e-08	1.47407810065774e-06	4.51248398160534e-07	5579/5594/6774/5290/3480/598	6
neuron	hsa04151	PI3K-Akt signaling pathway	9/22	354/8150	1.49824881832093e-07	4.1950966912986e-06	1.28421327284651e-06	5594/4790/1021/3320/5290/3480/598/1129/3643	9
neuron	hsa05225	Hepatocellular carcinoma	7/22	168/8150	1.83430092355019e-07	4.49403726269796e-06	1.37572569266264e-06	5579/2950/5594/1021/5290/3480/598	7
neuron	hsa04152	AMPK signaling pathway	6/22	120/8150	5.53143120916694e-07	1.20462279666302e-05	3.68762080611129e-06	6720/31/5468/5290/3480/3643	6
neuron	hsa05221	Acute myeloid leukemia	5/22	67/8150	7.62714273206411e-07	1.49491997548457e-05	4.57628563923847e-06	862/5594/4790/6774/5290	5
neuron	hsa05417	Lipid and atherosclerosis	7/22	215/8150	9.81947611634177e-07	1.74965210800271e-05	5.35607788164096e-06	5594/4790/5468/6774/3320/5290/598	7
neuron	hsa05223	Non-small cell lung cancer	5/22	72/8150	1.09537480721421e-06	1.78911218511655e-05	5.47687403607106e-06	5579/5594/1021/6774/5290	5
neuron	hsa05214	Glioma	5/22	75/8150	1.34414469111317e-06	2.01080694487146e-05	6.15553146389223e-06	5579/5594/1021/5290/3480	5
neuron	hsa05220	Chronic myeloid leukemia	5/22	76/8150	1.43629067490819e-06	2.01080694487146e-05	6.15553146389223e-06	5594/4790/1021/5290/598	5
neuron	hsa04014	Ras signaling pathway	7/22	235/8150	1.78611358098737e-06	2.33385507915682e-05	7.14445432394946e-06	5579/5594/4790/5290/3480/598/3643	7
neuron	hsa04960	Aldosterone-regulated sodium reabsorption	4/22	37/8150	2.48076900718244e-06	2.8726914903186e-05	8.79395354179163e-06	5579/5594/5290/3643	4
neuron	hsa04932	Non-alcoholic fatty liver disease	6/22	155/8150	2.49162017017429e-06	2.8726914903186e-05	8.79395354179163e-06	4790/6720/5468/5465/5290/3643	6
neuron	hsa05160	Hepatitis C	6/22	157/8150	2.6850864665474e-06	2.92376081912939e-05	8.95028822182466e-06	5594/4790/1021/6774/5465/5290	6
neuron	hsa04211	Longevity regulating pathway	5/22	89/8150	3.15442357704011e-06	3.25403695315716e-05	9.9613376117056e-06	4790/5468/5290/3480/3643	5
neuron	hsa04933	AGE-RAGE signaling pathway in diabetic complications	5/22	100/8150	5.61252522026741e-06	5.50027471586207e-05	1.68375756608022e-05	5579/5594/4790/6774/5290	5
neuron	hsa04730	Long-term depression	4/22	60/8150	1.75851754896321e-05	0.000164128304569899	5.02433585418059e-05	5579/5594/3480/2891	4
neuron	hsa04024	cAMP signaling pathway	6/22	221/8150	1.92627752268102e-05	0.000171613815657036	5.2534841527664e-05	5594/4790/5465/5290/1129/2891	6
neuron	hsa04068	FoxO signaling pathway	5/22	131/8150	2.10133589468257e-05	0.000174206719485332	5.33285875975507e-05	5594/6774/5290/3480/3643	5
neuron	hsa05163	Human cytomegalovirus infection	6/22	225/8150	2.13314350390203e-05	0.000174206719485332	5.33285875975507e-05	5579/5594/4790/1021/6774/5290	6
neuron	hsa04910	Insulin signaling pathway	5/22	137/8150	2.61011398439382e-05	0.000204632936376475	6.26427356254516e-05	5594/6720/31/5290/3643	5
neuron	hsa05162	Measles	5/22	139/8150	2.79945865381532e-05	0.000211036113903001	6.46028920111227e-05	4790/1021/6774/5290/598	5
neuron	hsa04917	Prolactin signaling pathway	4/22	70/8150	3.24843996973789e-05	0.000235812679284677	7.21875548830643e-05	5594/4790/6774/5290	4
neuron	hsa05218	Melanoma	4/22	72/8150	3.6319714009059e-05	0.000254237998063413	7.78279585908406e-05	5594/1021/5290/3480	4
neuron	hsa01524	Platinum drug resistance	4/22	73/8150	3.83571545720256e-05	0.000259241458486794	7.93596301490185e-05	2950/5594/5290/598	4
neuron	hsa05140	Leishmaniasis	4/22	77/8150	4.73535471343592e-05	0.000308349068641784	9.43925720331993e-05	5579/5594/4790/1915	4
neuron	hsa04150	mTOR signaling pathway	5/22	156/8150	4.87694955504863e-05	0.000308349068641784	9.43925720331993e-05	5579/5594/5290/3480/3643	5
neuron	hsa05161	Hepatitis B	5/22	162/8150	5.84221815595407e-05	0.000357835862052187	0.000109541590424139	5579/5594/4790/6774/5290	5
neuron	hsa04662	B cell receptor signaling pathway	4/22	82/8150	6.0662660660157e-05	0.000360299439072448	0.000110295746654831	5579/5594/4790/5290	4
neuron	hsa05164	Influenza A	5/22	171/8150	7.56061683635185e-05	0.000435847323507342	0.000133422650053268	5579/5594/4790/1021/5290	5
neuron	hsa05235	PD-L1 expression and PD-1 checkpoint pathway in cancer	4/22	89/8150	8.36383565477583e-05	0.000468374796667447	0.000143380039796157	5594/4790/6774/5290	4
neuron	hsa05222	Small cell lung cancer	4/22	92/8150	9.52064539890651e-05	0.000518346249496021	0.000158677423315108	4790/1021/5290/598	4
neuron	hsa05206	MicroRNAs in cancer	6/22	310/8150	0.000128462465813713	0.000673426432241383	0.000206150948645321	5579/5594/4790/1021/6774/5290	6
neuron	hsa04062	Chemokine signaling pathway	5/22	192/8150	0.000130882578130437	0.000673426432241383	0.000206150948645321	5579/5594/4790/6774/5290	5
neuron	hsa05202	Transcriptional misregulation in cancer	5/22	193/8150	0.000134127474118397	0.000673426432241383	0.000206150948645321	862/4790/5468/3480/598	5
neuron	hsa05167	Kaposi sarcoma-associated herpesvirus infection	5/22	194/8150	0.000137433965763548	0.000673426432241383	0.000206150948645321	5594/4790/1021/6774/5290	5
neuron	hsa04914	Progesterone-mediated oocyte maturation	4/22	102/8150	0.000142252094563842	0.000680034403280804	0.000208173796922695	5594/3320/5290/3480	4
neuron	hsa05415	Diabetic cardiomyopathy	5/22	203/8150	0.00017009804301447	0.000775739384516261	0.000237471240158039	5579/4790/5465/5290/3643	5
neuron	hsa05203	Viral carcinogenesis	5/22	204/8150	0.000174065391911526	0.000775739384516261	0.000237471240158039	5594/4790/1021/6774/5290	5
neuron	hsa04659	Th17 cell differentiation	4/22	108/8150	0.000177493359217581	0.000775739384516261	0.000237471240158039	5594/4790/6774/3320	4
neuron	hsa05205	Proteoglycans in cancer	5/22	205/8150	0.000178103430118529	0.000775739384516261	0.000237471240158039	5579/5594/6774/5290/3480	5
neuron	hsa04015	Rap1 signaling pathway	5/22	210/8150	0.00019938414985043	0.000845471427748042	0.000258817784004503	5579/5594/5290/3480/3643	5
neuron	hsa05145	Toxoplasmosis	4/22	112/8150	0.000204247878405169	0.000845471427748042	0.000258817784004503	5594/4790/6774/598	4
neuron	hsa05170	Human immunodeficiency virus 1 infection	5/22	212/8150	0.000208421663847305	0.000845471427748042	0.000258817784004503	5579/5594/4790/5290/598	5
neuron	hsa04725	Cholinergic synapse	4/22	113/8150	0.000211367856937011	0.000845471427748042	0.000258817784004503	5579/5594/5290/1129	4
neuron	hsa04930	Type II diabetes mellitus	3/22	46/8150	0.000240409575131822	0.00094240553451674	0.000288491490158186	5594/5290/3643	3
neuron	hsa04071	Sphingolipid signaling pathway	4/22	119/8150	0.000257914598903966	0.000972139642022641	0.000297593767966115	5579/5594/4790/5290	4
neuron	hsa05030	Cocaine addiction	3/22	49/8150	0.000290258594195592	0.00107340914079879	0.000328594634938406	4790/4129/2891	3
neuron	hsa05171	Coronavirus disease - COVID-19	5/22	232/8150	0.0003171028945348	0.00115096606164483	0.000352336549483111	5579/5594/4790/6774/5290	5
neuron	hsa04380	Osteoclast differentiation	4/22	128/8150	0.000341004884782031	0.00121521740758688	0.000372005328853125	5594/4790/5468/5290	4
neuron	hsa04210	Apoptosis	4/22	136/8150	0.00042966332329346	0.00150382163152711	0.000460353560671565	5594/4790/5290/598	4
neuron	hsa05418	Fluid shear stress and atherosclerosis	4/22	139/8150	0.000466809357266704	0.00160516901796972	0.000491378270807057	2950/4790/3320/5290	4
neuron	hsa04140	Autophagy - animal	4/22	141/8150	0.000492816405748915	0.00165359129072559	0.000506201415528241	5594/5290/3480/598	4
neuron	hsa04370	VEGF signaling pathway	3/22	59/8150	0.000503280152526139	0.00165359129072559	0.000506201415528241	5579/5594/5290	3
neuron	hsa04936	Alcoholic liver disease	4/22	142/8150	0.000506201415528241	0.00165359129072559	0.000506201415528241	4790/6720/31/5465	4
neuron	hsa04550	Signaling pathways regulating pluripotency of stem cells	4/22	143/8150	0.000519844574882757	0.00167032027339378	0.000511322532671565	5594/6774/5290/3480	4
neuron	hsa05224	Breast cancer	4/22	147/8150	0.000577056314491517	0.00181202878237517	0.000554702688482195	5594/1021/5290/3480	4
neuron	hsa04213	Longevity regulating pathway - multiple species	3/22	62/8150	0.000582437822906304	0.00181202878237517	0.000554702688482195	5290/3480/3643	3
neuron	hsa04723	Retrograde endocannabinoid signaling	4/22	148/8150	0.000592033471843933	0.00181310250752205	0.000555031379853687	5579/2554/5594/2891	4
neuron	hsa04929	GnRH secretion	3/22	64/8150	0.000639396614065954	0.00192802671318349	0.000590212259137803	5579/5594/5290	3
neuron	hsa04218	Cellular senescence	4/22	156/8150	0.000722012854865193	0.00213940794706942	0.000654920800123292	5594/4790/1021/5290	4
neuron	hsa04720	Long-term potentiation	3/22	67/8150	0.000731328226804342	0.00213940794706942	0.000654920800123292	5579/5594/2891	3
neuron	hsa04920	Adipocytokine signaling pathway	3/22	69/8150	0.000797066493831439	0.00226413091001394	0.00069310129898386	4790/6774/5465	3
neuron	hsa05031	Amphetamine addiction	3/22	69/8150	0.000797066493831439	0.00226413091001394	0.00069310129898386	5579/4129/2891	3
neuron	hsa04520	Adherens junction	3/22	71/8150	0.000866460573561305	0.00242608960597165	0.000742680491623976	5594/3480/3643	3
neuron	hsa04010	MAPK signaling pathway	5/22	294/8150	0.00093753241746155	0.00258811765947132	0.00079228091616469	5579/5594/4790/3480/3643	5
neuron	hsa04621	NOD-like receptor signaling pathway	4/22	184/8150	0.00133749683567821	0.00364096360823512	0.00111458069639851	5594/4790/3320/598	4
neuron	hsa04012	ErbB signaling pathway	3/22	85/8150	0.00146114323078696	0.00392306949635951	0.00120093964174271	5579/5594/5290	3
neuron	hsa04613	Neutrophil extracellular trap formation	4/22	190/8150	0.00150611471439404	0.00398916870298963	0.00122117409275193	5579/5594/4790/5290	4
neuron	hsa04510	Focal adhesion	4/22	201/8150	0.00185309002439576	0.00484274193042092	0.00148247201951661	5579/5594/5290/3480	4
neuron	hsa05169	Epstein-Barr virus infection	4/22	202/8150	0.00188716860001928	0.00486690849478656	0.00148986994738364	4790/1021/6774/5290	4
neuron	hsa04657	IL-17 signaling pathway	3/22	94/8150	0.00195202590756642	0.00496879321925998	0.00152105914875305	5594/4790/3320	3
neuron	hsa04666	Fc gamma R-mediated phagocytosis	3/22	97/8150	0.00213588254327893	0.00529915162636292	0.0016221892733764	5579/5594/5290	3
neuron	hsa04713	Circadian entrainment	3/22	97/8150	0.00213588254327893	0.00529915162636292	0.0016221892733764	5579/5594/2891	3
neuron	hsa01522	Endocrine resistance	3/22	98/8150	0.00219948578219206	0.0053222125099956	0.00162924872754967	5594/5290/3480	3
neuron	hsa05231	Choline metabolism in cancer	3/22	98/8150	0.00219948578219206	0.0053222125099956	0.00162924872754967	5579/5594/5290	3
neuron	hsa05142	Chagas disease	3/22	102/8150	0.00246569386600021	0.00582260238236194	0.00178242930072304	5594/4790/5290	3
neuron	hsa05146	Amoebiasis	3/22	102/8150	0.00246569386600021	0.00582260238236194	0.00178242930072304	5579/4790/5290	3
neuron	hsa04064	NF-kappa B signaling pathway	3/22	104/8150	0.00260598081932597	0.00587094529411368	0.00179722815125929	5579/4790/598	3
neuron	hsa04620	Toll-like receptor signaling pathway	3/22	104/8150	0.00260598081932597	0.00587094529411368	0.00179722815125929	5594/4790/5290	3
neuron	hsa04625	C-type lectin receptor signaling pathway	3/22	104/8150	0.00260598081932597	0.00587094529411368	0.00179722815125929	5594/4790/5290	3
neuron	hsa04660	T cell receptor signaling pathway	3/22	104/8150	0.00260598081932597	0.00587094529411368	0.00179722815125929	5594/4790/5290	3
neuron	hsa05166	Human T-cell leukemia virus 1 infection	4/22	222/8150	0.00266409300700277	0.00593366169741526	0.00181642705022916	5594/4790/5290/598	4
neuron	hsa04668	TNF signaling pathway	3/22	112/8150	0.00321637353308615	0.00708324957848187	0.00216834170769853	5594/4790/5290	3
neuron	hsa04724	Glutamatergic synapse	3/22	114/8150	0.00338156235760801	0.00736429135656855	0.00225437490507201	5579/5594/2891	3
neuron	hsa04726	Serotonergic synapse	3/22	115/8150	0.00346608249584855	0.00746540845259687	0.0022853291181419	5579/5594/4129	3
neuron	hsa04722	Neurotrophin signaling pathway	3/22	119/8150	0.00381715252450508	0.00813219450872822	0.00248944729859027	5594/4790/5290	3
neuron	hsa05131	Shigellosis	4/22	247/8150	0.00391574303990768	0.00825253371851511	0.0025262858321985	5594/4790/5290/598	4
neuron	hsa04919	Thyroid hormone signaling pathway	3/22	121/8150	0.00400056980627966	0.00831565636002729	0.00254560908980427	5579/5594/5290	3
neuron	hsa05132	Salmonella infection	4/22	249/8150	0.00403054772552343	0.00831565636002729	0.00254560908980427	5594/4790/3320/5290	4
neuron	hsa05216	Thyroid cancer	2/22	37/8150	0.00437530862887923	0.00893292178396176	0.00273456789304952	5594/5468	2
neuron	hsa04926	Relaxin signaling pathway	3/22	129/8150	0.00478792042771395	0.00967456086424674	0.00296160026456533	5594/4790/5290	3
neuron	hsa04114	Oocyte meiosis	3/22	131/8150	0.00499841045635732	0.00989584292369733	0.00302933967051959	5594/3480/367	3
neuron	hsa04650	Natural killer cell mediated cytotoxicity	3/22	131/8150	0.00499841045635732	0.00989584292369733	0.00302933967051959	5579/5594/5290	3
neuron	hsa05033	Nicotine addiction	2/22	40/8150	0.00509922480159319	0.00990815714930626	0.00303310933142028	2554/2891	2
neuron	hsa04728	Dopaminergic synapse	3/22	132/8150	0.00510573404122414	0.00990815714930626	0.00303310933142028	5579/4129/2891	3
neuron	hsa05135	Yersinia infection	3/22	137/8150	0.0056633506321084	0.0108825169009142	0.00333138272476965	5594/4790/5290	3
neuron	hsa04915	Estrogen signaling pathway	3/22	138/8150	0.00577910994406458	0.0109971412527831	0.00336647181207646	5594/3320/5290	3
neuron	hsa05017	Spinocerebellar ataxia	3/22	143/8150	0.00637936097033549	0.0120226418287092	0.00368040055980893	5579/5290/2891	3
neuron	hsa04973	Carbohydrate digestion and absorption	2/22	47/8150	0.00698682841032067	0.012972619114029	0.00397120993286601	5579/5290	2
neuron	hsa04072	Phospholipase D signaling pathway	3/22	148/8150	0.00701580421472994	0.012972619114029	0.00397120993286601	5594/5290/3643	3
neuron	hsa05022	Pathways of neurodegeneration - multiple diseases	5/22	476/8150	0.0076516031205848	0.0140160206694824	0.00429061857229054	5579/5594/4790/598/2891	5
neuron	hsa04913	Ovarian steroidogenesis	2/22	51/8150	0.00818719065482826	0.0148582348920957	0.00454843925268237	3480/3643	2
neuron	hsa04630	JAK-STAT signaling pathway	3/22	162/8150	0.00899503498260946	0.0161745583173528	0.00495139540327127	6774/5290/598	3
neuron	hsa04923	Regulation of lipolysis in adipocytes	2/22	56/8150	0.00980867345089027	0.0174772726943136	0.00535018551866742	5290/3643	2
neuron	hsa05134	Legionellosis	2/22	57/8150	0.0101488227206206	0.0179204437228976	0.00548585011925436	4790/1915	2
neuron	hsa05213	Endometrial cancer	2/22	58/8150	0.0104941904725322	0.0183648333269314	0.00562188775314225	5594/5290	2
neuron	hsa05165	Human papillomavirus infection	4/22	331/8150	0.0109420769663885	0.0189791777470101	0.0058099523715337	5594/4790/1021/5290	4
neuron	hsa05321	Inflammatory bowel disease	2/22	65/8150	0.0130555448495109	0.0224463753552994	0.0068713393944794	4790/6774	2
neuron	hsa04664	Fc epsilon RI signaling pathway	2/22	68/8150	0.0142287793257822	0.0242507891117679	0.00742371095258201	5594/5290	2
neuron	hsa05211	Renal cell carcinoma	2/22	69/8150	0.0146297259774822	0.0247191921688492	0.00756709964352528	5594/5290	2
neuron	hsa05230	Central carbon metabolism in cancer	2/22	70/8150	0.0150355619911443	0.0251877790620878	0.00771054461084322	5594/5290	2
neuron	hsa00982	Drug metabolism - cytochrome P450	2/22	72/8150	0.015861795066631	0.0263467104496583	0.00806531952540561	2950/4129	2
neuron	hsa04115	p53 signaling pathway	2/22	73/8150	0.0162821388530921	0.0268176404639165	0.00820948177466831	1021/598	2
neuron	hsa03320	PPAR signaling pathway	2/22	75/8150	0.0171371484624514	0.0279906758220039	0.0085685742312257	5468/5465	2
neuron	hsa05133	Pertussis	2/22	76/8150	0.0175717615906852	0.0284633493535067	0.00871327021025714	5594/4790	2
neuron	hsa05010	Alzheimer disease	4/22	384/8150	0.0180800954846246	0.0290467107785772	0.00889185023833995	5594/4790/5290/3643	4
neuron	hsa04810	Regulation of actin cytoskeleton	3/22	218/8150	0.0199778186514848	0.0318345728104961	0.00974527739096818	5594/5290/1129	3
neuron	hsa05208	Chemical carcinogenesis - reactive oxygen species	3/22	223/8150	0.0212055675677074	0.0335184777683117	0.0102607585005036	5594/4790/5290	3
neuron	hsa05210	Colorectal cancer	2/22	86/8150	0.022172331742894	0.0347662161728579	0.0106427192365891	5594/5290	2
neuron	hsa04540	Gap junction	2/22	88/8150	0.0231466255270944	0.0360058619310358	0.0110222026319497	5579/5594	2
neuron	hsa04727	GABAergic synapse	2/22	89/8150	0.02364038024994	0.0364843663699861	0.0111686835826488	5579/2554	2
neuron	hsa05032	Morphine addiction	2/22	91/8150	0.0246409804540836	0.0377315013203155	0.0115504595878517	5579/2554	2
neuron	hsa04658	Th1 and Th2 cell differentiation	2/22	92/8150	0.025147776250174	0.0382090243801093	0.01169664011636	5594/4790	2
neuron	hsa04912	GnRH signaling pathway	2/22	93/8150	0.025658869538157	0.0386856802267598	0.0118425551714571	5579/5594	2
neuron	hsa04070	Phosphatidylinositol signaling system	2/22	97/8150	0.0277457266916501	0.041512690317278	0.0127079664236565	5579/5290	2
neuron	hsa04750	Inflammatory mediator regulation of TRP channels	2/22	98/8150	0.0282779400439305	0.0419884564288665	0.0128536091108775	5579/5290	2
neuron	hsa04916	Melanogenesis	2/22	101/8150	0.0298993908996216	0.0440622602731266	0.0134884470223857	5579/5594	2
neuron	hsa04922	Glucagon signaling pathway	2/22	107/8150	0.0332517926976487	0.0482766768054752	0.0147785745322883	31/5465	2
neuron	hsa04670	Leukocyte transendothelial migration	2/22	114/8150	0.037341753902654	0.0538160570950014	0.0164743031923474	5579/5290	2
neuron	hsa00360	Phenylalanine metabolism	1/22	16/8150	0.0423649145646473	0.060609658793218	0.0185539771815974	4129	1
neuron	hsa04611	Platelet activation	2/22	124/8150	0.0435036800595741	0.0617878354469313	0.0189146435041626	5594/5290	2
neuron	hsa00061	Fatty acid biosynthesis	1/22	18/8150	0.0475384509203206	0.0670326358300924	0.020520194641865	31	1
neuron	hsa04270	Vascular smooth muscle contraction	2/22	134/8150	0.0500210350462659	0.0700294490647723	0.0214375864483997	5579/5594	2
neuron	hsa00340	Histidine metabolism	1/22	22/8150	0.0578055977170804	0.0803538805145231	0.0245981266881193	4129	1
neuron	hsa05226	Gastric cancer	2/22	149/8150	0.0604167475576456	0.0833921304316798	0.0255282031933714	5594/5290	2
neuron	hsa04921	Oxytocin signaling pathway	2/22	154/8150	0.0640369473300827	0.0877709208160573	0.0268686492294053	5579/5594	2
neuron	hsa04934	Cushing syndrome	2/22	155/8150	0.0647698657041619	0.0881589838751092	0.0269874440434008	5594/1021	2
neuron	hsa04217	Necroptosis	2/22	159/8150	0.0677304842373889	0.091552930417436	0.0280264072706437	6774/3320	2
neuron	hsa04080	Neuroactive ligand-receptor interaction	3/22	362/8150	0.0716482542972904	0.0961853276867734	0.0294444880673796	2554/1129/2891	3
neuron	hsa04022	cGMP-PKG signaling pathway	2/22	167/8150	0.0737866733035117	0.0983822310713489	0.0301170095116374	5594/3643	2
neuron	hsa01523	Antifolate resistance	1/22	30/8150	0.0780238377886517	0.103328866260647	0.031631285589994	4790	1
neuron	hsa00640	Propanoate metabolism	1/22	32/8150	0.0830133066817358	0.108470720730801	0.0332053226726943	31	1
neuron	hsa04215	Apoptosis - multiple species	1/22	32/8150	0.0830133066817358	0.108470720730801	0.0332053226726943	598	1
neuron	hsa05152	Tuberculosis	2/22	180/8150	0.083990503548682	0.10902078606319	0.0333737100193438	5594/4790	2
neuron	hsa04360	Axon guidance	2/22	182/8150	0.0855980691450527	0.110376457581779	0.0337887115046261	5594/5290	2
neuron	hsa05034	Alcoholism	2/22	187/8150	0.0896589547907494	0.114857223130633	0.0351603744277449	5594/4129	2
neuron	hsa00350	Tyrosine metabolism	1/22	36/8150	0.0929150296670478	0.118255492303515	0.0362006609092394	4129	1
neuron	hsa05143	African trypanosomiasis	1/22	37/8150	0.0953744663625522	0.120602551013292	0.036919148269375	5579	1
neuron	hsa05130	Pathogenic Escherichia coli infection	2/22	197/8150	0.0979533023123752	0.123069533674523	0.0376743470432212	5594/4790	2
neuron	hsa05219	Bladder cancer	1/22	41/8150	0.105148708914342	0.130437638906399	0.0399298894611425	5594	1
neuron	hsa00380	Tryptophan metabolism	1/22	42/8150	0.107576471696915	0.132609990267895	0.0405948949799679	4129	1
neuron	hsa00620	Pyruvate metabolism	1/22	47/8150	0.119621275473037	0.146536062454471	0.044857978302389	31	1
neuron	hsa00330	Arginine and proline metabolism	1/22	51/8150	0.129145231098881	0.157220281337768	0.0481286575523778	4129	1
neuron	hsa04961	Endocrine and other factor-regulated calcium reabsorption	1/22	53/8150	0.133870249815818	0.161966475085804	0.0495815740058584	5579	1
neuron	hsa04020	Calcium signaling pathway	2/22	240/8150	0.135884226295769	0.163394529778961	0.0500187336058044	5579/1129	2
neuron	hsa01212	Fatty acid metabolism	1/22	57/8150	0.143246975873992	0.17119760531282	0.0524074301978019	31	1
neuron	hsa00480	Glutathione metabolism	1/22	58/8150	0.145575972109105	0.172399748033705	0.0527754330715425	2950	1
neuron	hsa05168	Herpes simplex virus 1 infection	3/22	495/8150	0.146012031497934	0.172399748033705	0.0527754330715425	4790/5290/598	3
neuron	hsa04623	Cytosolic DNA-sensing pathway	1/22	63/8150	0.157130589947134	0.184416740297235	0.0564541041726229	4790	1
neuron	hsa05012	Parkinson disease	2/22	266/8150	0.16025073599652	0.186959191995941	0.057232405713043	4129/598	2
neuron	hsa05020	Prion disease	2/22	273/8150	0.166955418925028	0.193628769877548	0.0592741132278207	5594/5290	2
neuron	hsa05204	Chemical carcinogenesis - DNA adducts	1/22	69/8150	0.170799289139539	0.19692153336088	0.0602821020492491	2950	1
neuron	hsa04622	RIG-I-like receptor signaling pathway	1/22	70/8150	0.17305673446053	0.197204185780604	0.060368628300185	4790	1
neuron	hsa05120	Epithelial cell signaling in Helicobacter pylori infection	1/22	70/8150	0.17305673446053	0.197204185780604	0.060368628300185	4790	1
neuron	hsa04137	Mitophagy - animal	1/22	72/8150	0.177554038258671	0.201159488431789	0.0615794352342211	598	1
neuron	hsa00562	Inositol phosphate metabolism	1/22	73/8150	0.179793925750415	0.20252649107518	0.0619979054311774	5290	1
neuron	hsa04918	Thyroid hormone synthesis	1/22	75/8150	0.184256244199978	0.206366993503975	0.0631735694399923	5579	1
neuron	hsa04971	Gastric acid secretion	1/22	76/8150	0.186478703968102	0.207669465782659	0.063572285443671	5579	1
neuron	hsa05100	Bacterial invasion of epithelial cells	1/22	77/8150	0.188695383248842	0.208950819868775	0.0639645366945228	5290	1
neuron	hsa00980	Metabolism of xenobiotics by cytochrome P450	1/22	78/8150	0.190906296362744	0.209037061939094	0.0639909373282939	2950	1
neuron	hsa04612	Antigen processing and presentation	1/22	78/8150	0.190906296362744	0.209037061939094	0.0639909373282939	3320	1
neuron	hsa00983	Drug metabolism - other enzymes	1/22	80/8150	0.195310881203737	0.212671848421847	0.0651036270679124	2950	1
neuron	hsa05016	Huntington disease	2/22	306/8150	0.199212484021421	0.21572180590165	0.0660372875209131	5468/2891	2
neuron	hsa04742	Taste transduction	1/22	86/8150	0.208387726643996	0.223191226350946	0.06832384480131	2554	1
neuron	hsa04911	Insulin secretion	1/22	86/8150	0.208387726643996	0.223191226350946	0.06832384480131	5579	1
neuron	hsa04970	Salivary secretion	1/22	92/8150	0.221261572181955	0.235691674715561	0.0721505126680287	5579	1
neuron	hsa04350	TGF-beta signaling pathway	1/22	94/8150	0.225508263276448	0.238916862714507	0.0731378151166859	5594	1
neuron	hsa04925	Aldosterone synthesis and secretion	1/22	98/8150	0.233935421271503	0.246512594458143	0.0754630391198398	5579	1
neuron	hsa04972	Pancreatic secretion	1/22	102/8150	0.242275008905952	0.253935303452228	0.0777352969751719	5579	1
neuron	hsa03013	Nucleocytoplasmic transport	1/22	108/8150	0.254622090434905	0.265457073006603	0.0812623692877356	1915	1
neuron	hsa05014	Amyotrophic lateral sclerosis	2/22	364/8150	0.257586730557433	0.267126979837338	0.0817735652563279	598/2891	2
neuron	hsa04110	Cell cycle	1/22	126/8150	0.290521546446228	0.299695911070846	0.0917436462461774	1021	1
neuron	hsa04371	Apelin signaling pathway	1/22	139/8150	0.315416002213857	0.323672965622597	0.0990835609048765	5594	1
neuron	hsa04261	Adrenergic signaling in cardiomyocytes	1/22	150/8150	0.335827164941613	0.34282356421123	0.104945989044254	5594	1
neuron	hsa04310	Wnt signaling pathway	1/22	170/8150	0.371459134837433	0.377039293999892	0.115420192040783	5579	1
neuron	hsa04141	Protein processing in endoplasmic reticulum	1/22	171/8150	0.373191954265199	0.377039293999892	0.115420192040783	3320	1
neuron	hsa04714	Thermogenesis	1/22	232/8150	0.470687396628484	0.473101178149656	0.144826891270303	5468	1
neuron	hsa04144	Endocytosis	1/22	251/8150	0.497972781061384	0.497972781061384	0.152440647263689	3480	1
astrocyte	hsa05215	Prostate cancer	6/13	97/8146	3.91338920347816e-09	5.67441434504333e-07	1.85371067533176e-07	1956/3551/5290/5925/4792/3320	6
astrocyte	hsa05160	Hepatitis C	6/13	157/8146	7.15105574465285e-08	3.63132273092117e-06	1.18627602825011e-06	1956/3551/5290/5925/6774/4792	6
astrocyte	hsa05212	Pancreatic cancer	5/13	76/8146	7.51308151225071e-08	3.63132273092117e-06	1.18627602825011e-06	1956/3551/5290/5925/6774	5
astrocyte	hsa05235	PD-L1 expression and PD-1 checkpoint pathway in cancer	5/13	89/8146	1.66997883422545e-07	6.05367327406726e-06	1.97760651421435e-06	1956/3551/5290/6774/4792	5
astrocyte	hsa05207	Chemical carcinogenesis - receptor activation	6/13	212/8146	4.26648846343581e-07	1.1203659513867e-05	3.65999766333224e-06	1956/5290/2052/5925/6774/3320	6
astrocyte	hsa05417	Lipid and atherosclerosis	6/13	215/8146	4.63599704022084e-07	1.1203659513867e-05	3.65999766333224e-06	3551/5290/3309/6774/4792/3320	6
astrocyte	hsa05163	Human cytomegalovirus infection	6/13	225/8146	6.0633234730181e-07	1.25597414798232e-05	4.10300084640323e-06	1956/3551/5290/5925/6774/4792	6
astrocyte	hsa05161	Hepatitis B	5/13	162/8146	3.3089313957105e-06	5.99743815472528e-05	1.95923569482858e-05	3551/5290/5925/6774/4792	5
astrocyte	hsa05223	Non-small cell lung cancer	4/13	72/8146	3.77748084294925e-06	6.0859413580849e-05	1.98814781207855e-05	1956/5290/5925/6774	4
astrocyte	hsa05220	Chronic myeloid leukemia	4/13	76/8146	4.69407345491231e-06	6.80640650962285e-05	2.22350847864268e-05	3551/5290/5925/4792	4
astrocyte	hsa05167	Kaposi sarcoma-associated herpesvirus infection	5/13	194/8146	8.01812559893999e-06	0.000105693473804209	3.45278135839521e-05	3551/5290/5925/6774/4792	5
astrocyte	hsa05169	Epstein-Barr virus infection	5/13	202/8146	9.76854373691028e-06	0.000112415820467788	3.6723861495829e-05	3551/5290/5925/6774/4792	5
astrocyte	hsa05222	Small cell lung cancer	4/13	92/8146	1.00786597660775e-05	0.000112415820467788	3.6723861495829e-05	3551/5290/5925/4792	4
astrocyte	hsa05208	Chemical carcinogenesis - reactive oxygen species	5/13	223/8146	1.58143705302275e-05	0.000163452457392355	5.33964470610235e-05	1956/3551/5290/2052/4792	5
astrocyte	hsa04659	Th17 cell differentiation	4/13	108/8146	1.90571500497043e-05	0.000163452457392355	5.33964470610235e-05	3551/6774/4792/3320	4
astrocyte	hsa04931	Insulin resistance	4/13	108/8146	1.90571500497043e-05	0.000163452457392355	5.33964470610235e-05	3551/5290/6774/4792	4
astrocyte	hsa05171	Coronavirus disease - COVID-19	5/13	232/8146	1.91633915563451e-05	0.000163452457392355	5.33964470610235e-05	1956/3551/5290/6774/4792	5
astrocyte	hsa04068	FoxO signaling pathway	4/13	131/8146	4.08193721091114e-05	0.000328822719767842	0.000107419400287135	1956/3551/5290/6774	4
astrocyte	hsa05162	Measles	4/13	139/8146	5.15116520599675e-05	0.000393115239405015	0.000128422401257537	3551/5290/6774/4792	4
astrocyte	hsa05221	Acute myeloid leukemia	3/13	67/8146	0.000143411411979209	0.00103973273684927	0.00033965860731918	3551/5290/6774	3
astrocyte	hsa04920	Adipocytokine signaling pathway	3/13	69/8146	0.000156560496957652	0.00107708409504468	0.000351860502918408	3551/6774/4792	3
astrocyte	hsa05120	Epithelial cell signaling in Helicobacter pylori infection	3/13	70/8146	0.000163419655799883	0.00107708409504468	0.000351860502918408	1956/3551/4792	3
astrocyte	hsa05218	Melanoma	3/13	72/8146	0.000177719391139347	0.00109365930763738	0.000357275272912392	1956/5290/5925	3
astrocyte	hsa04062	Chemokine signaling pathway	4/13	192/8146	0.000181019471608945	0.00109365930763738	0.000357275272912392	3551/5290/6774/4792	4
astrocyte	hsa05214	Glioma	3/13	75/8146	0.0002006587925041	0.00116382099652378	0.000380195606849874	1956/5290/5925	3
astrocyte	hsa05203	Viral carcinogenesis	4/13	204/8146	0.000228654818855067	0.00125734378089167	0.000410747514628857	5290/5925/6774/4792	4
astrocyte	hsa01521	EGFR tyrosine kinase inhibitor resistance	3/13	79/8146	0.000234126083338448	0.00125734378089167	0.000410747514628857	1956/5290/6774	3
astrocyte	hsa04662	B cell receptor signaling pathway	3/13	82/8146	0.000261470299279533	0.00135404262126901	0.000442336972465376	3551/5290/4792	3
astrocyte	hsa05166	Human T-cell leukemia virus 1 infection	4/13	222/8146	0.000316307327547191	0.00158153663773596	0.000516654437009931	3551/5290/5925/4792	4
astrocyte	hsa04657	IL-17 signaling pathway	3/13	94/8146	0.000391395094949936	0.00189174295892469	0.00061799225518411	3551/4792/3320	3
astrocyte	hsa01522	Endocrine resistance	3/13	98/8146	0.000442465855040322	0.00206461117063111	0.000674464629244282	1956/5290/5925	3
astrocyte	hsa05131	Shigellosis	4/13	247/8146	0.000475265720494509	0.00206461117063111	0.000674464629244282	1956/3551/5290/4792	4
astrocyte	hsa05132	Salmonella infection	4/13	249/8146	0.000490062023363432	0.00206461117063111	0.000674464629244282	3551/5290/4792/3320	4
astrocyte	hsa05142	Chagas disease	3/13	102/8146	0.000497652296977289	0.00206461117063111	0.000674464629244282	3551/5290/4792	3
astrocyte	hsa04620	Toll-like receptor signaling pathway	3/13	104/8146	0.000526831815954145	0.00206461117063111	0.000674464629244282	3551/5290/4792	3
astrocyte	hsa04625	C-type lectin receptor signaling pathway	3/13	104/8146	0.000526831815954145	0.00206461117063111	0.000674464629244282	3551/5290/4792	3
astrocyte	hsa04660	T cell receptor signaling pathway	3/13	104/8146	0.000526831815954145	0.00206461117063111	0.000674464629244282	3551/5290/4792	3
astrocyte	hsa04066	HIF-1 signaling pathway	3/13	109/8146	0.00060454276451946	0.00230680791724531	0.000753585163528413	1956/5290/6774	3
astrocyte	hsa04668	TNF signaling pathway	3/13	112/8146	0.000654517949359697	0.0023726275664289	0.000775087045294378	3551/5290/4792	3
astrocyte	hsa05145	Toxoplasmosis	3/13	112/8146	0.000654517949359697	0.0023726275664289	0.000775087045294378	3551/6774/4792	3
astrocyte	hsa04722	Neurotrophin signaling pathway	3/13	119/8146	0.000781250439062492	0.00276295886985516	0.000902599993782084	3551/5290/4792	3
astrocyte	hsa04380	Osteoclast differentiation	3/13	128/8146	0.000965923466794625	0.00333165080843705	0.00108837957444405	3551/5290/4792	3
astrocyte	hsa04926	Relaxin signaling pathway	3/13	129/8146	0.000988006791467539	0.00333165080843705	0.00108837957444405	1956/5290/4792	3
astrocyte	hsa05206	MicroRNAs in cancer	4/13	310/8146	0.00111975510830419	0.00369010206145699	0.00120547798740882	1956/3551/5290/6774	4
astrocyte	hsa04210	Apoptosis	3/13	136/8146	0.00115164853235582	0.00370576163045019	0.00121059363608173	3551/5290/4792	3
astrocyte	hsa05135	Yersinia infection	3/13	137/8146	0.00117634217208006	0.00370576163045019	0.00121059363608173	3551/5290/4792	3
astrocyte	hsa04915	Estrogen signaling pathway	3/13	138/8146	0.00120137035436492	0.00370576163045019	0.00121059363608173	1956/5290/3320	3
astrocyte	hsa05418	Fluid shear stress and atherosclerosis	3/13	139/8146	0.00122673488456282	0.00370576163045019	0.00121059363608173	3551/5290/3320	3
astrocyte	hsa05165	Human papillomavirus infection	4/13	331/8146	0.00142985611307377	0.00418172309636155	0.00136608014037219	1956/3551/5290/5925	4
astrocyte	hsa05224	Breast cancer	3/13	147/8146	0.00144197348150398	0.00418172309636155	0.00136608014037219	1956/5290/5925	3
astrocyte	hsa05226	Gastric cancer	3/13	149/8146	0.00149927041291531	0.00426263156613176	0.00139251121942598	1956/5290/5925	3
astrocyte	hsa04151	PI3K-Akt signaling pathway	4/13	354/8146	0.00183433592698546	0.00509263884235207	0.00166365697209323	1956/3551/5290/3320	4
astrocyte	hsa05219	Bladder cancer	2/13	41/8146	0.00186144730099765	0.00509263884235207	0.00166365697209323	1956/5925	2
astrocyte	hsa04630	JAK-STAT signaling pathway	3/13	162/8146	0.00190697694629484	0.00512058624468058	0.00167278679499547	1956/5290/6774	3
astrocyte	hsa05225	Hepatocellular carcinoma	3/13	168/8146	0.00211642933893804	0.00557967734810937	0.00182276211009017	1956/5290/5925	3
astrocyte	hsa05164	Influenza A	3/13	171/8146	0.00222635375714001	0.00576466597830897	0.00188319396750565	3551/5290/4792	3
astrocyte	hsa04930	Type II diabetes mellitus	2/13	46/8146	0.00233895991099136	0.00594998573848679	0.00194373399805376	3551/5290	2
astrocyte	hsa04621	NOD-like receptor signaling pathway	3/13	184/8146	0.00274390389819964	0.0068597597454991	0.00224093784789444	3551/4792/3320	3
astrocyte	hsa05134	Legionellosis	2/13	57/8146	0.0035712173587025	0.00877672062731969	0.00286716826300825	4792/1915	2
astrocyte	hsa05213	Endometrial cancer	2/13	58/8146	0.00369543428772433	0.00886109817870866	0.00289473261736399	1956/5290	2
astrocyte	hsa05205	Proteoglycans in cancer	3/13	205/8146	0.00372777233724985	0.00886109817870866	0.00289473261736399	1956/5290/6774	3
astrocyte	hsa04370	VEGF signaling pathway	2/13	59/8146	0.00382165855731832	0.00893774985179284	0.00291977309132978	3315/5290	2
astrocyte	hsa05170	Human immunodeficiency virus 1 infection	3/13	212/8146	0.00409813171442736	0.00943220791415821	0.00308130204092283	3551/5290/4792	3
astrocyte	hsa04623	Cytosolic DNA-sensing pathway	2/13	63/8146	0.00434651497288979	0.00984757298545342	0.0032169929898033	3551/4792	2
astrocyte	hsa04622	RIG-I-like receptor signaling pathway	2/13	70/8146	0.00534098418186993	0.0115588463637483	0.00377602966510835	3551/4792	2
astrocyte	hsa04917	Prolactin signaling pathway	2/13	70/8146	0.00534098418186993	0.0115588463637483	0.00377602966510835	5290/6774	2
astrocyte	hsa05230	Central carbon metabolism in cancer	2/13	70/8146	0.00534098418186993	0.0115588463637483	0.00377602966510835	1956/5290	2
astrocyte	hsa04014	Ras signaling pathway	3/13	235/8146	0.00547160264997222	0.0116673880036172	0.00381148791406733	1956/3551/5290	3
astrocyte	hsa05140	Leishmaniasis	2/13	77/8146	0.00643049139205355	0.0135133514760546	0.00441452498310312	4792/1915	2
astrocyte	hsa04612	Antigen processing and presentation	2/13	78/8146	0.00659378212815361	0.0136585486940325	0.00446195783108139	3309/3320	2
astrocyte	hsa04012	ErbB signaling pathway	2/13	85/8146	0.00778957382301015	0.0159082845681193	0.00519689876998453	1956/5290	2
astrocyte	hsa05210	Colorectal cancer	2/13	86/8146	0.0079678722374502	0.0160464093670872	0.00524202120884882	1956/5290	2
astrocyte	hsa04540	Gap junction	2/13	88/8146	0.00833001794083599	0.016545926046866	0.00540520270133554	2697/1956	2
astrocyte	hsa04658	Th1 and Th2 cell differentiation	2/13	92/8146	0.00907635354435889	0.0177847468098924	0.0058098991393478	3551/4792	2
astrocyte	hsa04010	MAPK signaling pathway	3/13	294/8146	0.0101684498708273	0.0195565373227925	0.00638870547750028	3315/1956/3551	3
astrocyte	hsa05231	Choline metabolism in cancer	2/13	98/8146	0.0102503230105671	0.0195565373227925	0.00638870547750028	1956/5290	2
astrocyte	hsa04933	AGE-RAGE signaling pathway in diabetic complications	2/13	100/8146	0.0106559997450383	0.0200664930263708	0.00655529717739882	5290/6774	2
astrocyte	hsa04914	Progesterone-mediated oocyte maturation	2/13	102/8146	0.0110687826169814	0.0203161199931937	0.00663684500685094	5290/3320	2
astrocyte	hsa05146	Amoebiasis	2/13	102/8146	0.0110687826169814	0.0203161199931937	0.00663684500685094	3315/5290	2
astrocyte	hsa04064	NF-kappa B signaling pathway	2/13	104/8146	0.0114886294780306	0.0208231409289305	0.00680247798041285	3551/4792	2
astrocyte	hsa04910	Insulin signaling pathway	2/13	137/8146	0.0193991341647563	0.0343033469986544	0.0112061750630813	3551/5290	2
astrocyte	hsa04936	Alcoholic liver disease	2/13	142/8146	0.0207529871044687	0.0358720922691918	0.0117186508320409	3551/4792	2
astrocyte	hsa05010	Alzheimer disease	3/13	384/8146	0.0208852596888138	0.0358720922691918	0.0117186508320409	3551/5290/351	3
astrocyte	hsa04550	Signaling pathways regulating pluripotency of stem cells	2/13	143/8146	0.02102846788194	0.0358720922691918	0.0117186508320409	5290/6774	2
astrocyte	hsa04072	Phospholipase D signaling pathway	2/13	148/8146	0.0224291552710866	0.0378165990035763	0.0123538798922754	1956/5290	2
astrocyte	hsa04932	Non-alcoholic fatty liver disease	2/13	155/8146	0.024454434148796	0.0398746811714674	0.0130262116349621	3551/5290	2
astrocyte	hsa04934	Cushing syndrome	2/13	155/8146	0.024454434148796	0.0398746811714674	0.0130262116349621	1956/5925	2
astrocyte	hsa04150	mTOR signaling pathway	2/13	156/8146	0.024749802106428	0.0398746811714674	0.0130262116349621	3551/5290	2
astrocyte	hsa04218	Cellular senescence	2/13	156/8146	0.024749802106428	0.0398746811714674	0.0130262116349621	5290/5925	2
astrocyte	hsa04217	Necroptosis	2/13	159/8146	0.0256448650850674	0.040862697113569	0.0133489754635979	6774/3320	2
astrocyte	hsa04141	Protein processing in endoplasmic reticulum	2/13	171/8146	0.0293572491366402	0.0462695774436178	0.0151152884570802	3309/3320	2
astrocyte	hsa03060	Protein export	1/13	23/8146	0.0361158682295638	0.0563096870245887	0.018395179064294	3309	1
astrocyte	hsa05130	Pathogenic Escherichia coli infection	2/13	197/8146	0.0380949434221538	0.05876347655545	0.0191967799999655	3551/4792	2
astrocyte	hsa04510	Focal adhesion	2/13	201/8146	0.0395197394077233	0.0603196022538935	0.0197051332226875	1956/5290	2
astrocyte	hsa05168	Herpes simplex virus 1 infection	3/13	495/8146	0.0404018524742472	0.0610236313413109	0.0199351245761088	3551/5290/4792	3
astrocyte	hsa04015	Rap1 signaling pathway	2/13	210/8146	0.0428007158666054	0.063980451553173	0.0209010549538496	1956/5290	2
astrocyte	hsa04810	Regulation of actin cytoskeleton	2/13	218/8146	0.0458024947378151	0.067768997316155	0.0221386924081813	1956/5290	2
astrocyte	hsa01523	Antifolate resistance	1/13	30/8146	0.0468662746018185	0.0680751905991112	0.0222387192519783	3551	1
astrocyte	hsa04024	cAMP signaling pathway	2/13	221/8146	0.0469484073097319	0.0680751905991112	0.0222387192519783	5290/4792	2
astrocyte	hsa04960	Aldosterone-regulated sodium reabsorption	1/13	37/8146	0.0575059074557432	0.0825579859513146	0.0269699409641318	5290	1
astrocyte	hsa05020	Prion disease	2/13	273/8146	0.068442869022181	0.0972962353746691	0.0317846140969881	5290/3309	2
astrocyte	hsa04973	Carbohydrate digestion and absorption	1/13	47/8146	0.0725152989947772	0.102084644215948	0.0333488855877871	5290	1
astrocyte	hsa04923	Regulation of lipolysis in adipocytes	1/13	56/8146	0.0858347866218993	0.11967350057861	0.0390947914775857	5290	1
astrocyte	hsa04213	Longevity regulating pathway - multiple species	1/13	62/8146	0.0946161110282161	0.13066034380087	0.0426839598623531	5290	1
astrocyte	hsa04929	GnRH secretion	1/13	64/8146	0.0975258719655034	0.133408032405642	0.0435815713847831	5290	1
astrocyte	hsa05321	Inflammatory bowel disease	1/13	65/8146	0.0989775131019115	0.134128405605394	0.0438169020126514	6774	1
astrocyte	hsa04664	Fc epsilon RI signaling pathway	1/13	68/8146	0.103319514430766	0.138096089449683	0.0451130600743067	5290	1
astrocyte	hsa05204	Chemical carcinogenesis - DNA adducts	1/13	69/8146	0.104762550617001	0.138096089449683	0.0451130600743067	2052	1
astrocyte	hsa05211	Renal cell carcinoma	1/13	69/8146	0.104762550617001	0.138096089449683	0.0451130600743067	5290	1
astrocyte	hsa04520	Adherens junction	1/13	71/8146	0.107642194152441	0.140613677045982	0.0459355024832609	1956	1
astrocyte	hsa00562	Inositol phosphate metabolism	1/13	73/8146	0.110513285354749	0.141809082977333	0.0463260162176406	5290	1
astrocyte	hsa01524	Platinum drug resistance	1/13	73/8146	0.110513285354749	0.141809082977333	0.0463260162176406	5290	1
astrocyte	hsa04918	Thyroid hormone synthesis	1/13	75/8146	0.11337584751285	0.14420612183652	0.0471090779139266	3309	1
astrocyte	hsa05100	Bacterial invasion of epithelial cells	1/13	77/8146	0.116229903858001	0.145287379822502	0.0474623019383853	5290	1
astrocyte	hsa05412	Arrhythmogenic right ventricular cardiomyopathy	1/13	77/8146	0.116229903858001	0.145287379822502	0.0474623019383853	2697	1
astrocyte	hsa00980	Metabolism of xenobiotics by cytochrome P450	1/13	78/8146	0.117653749594753	0.145810202489223	0.0476330970019242	2052	1
astrocyte	hsa04211	Longevity regulating pathway	1/13	89/8146	0.133176913573701	0.162274390488964	0.0530115976188993	5290	1
astrocyte	hsa04976	Bile secretion	1/13	89/8146	0.133176913573701	0.162274390488964	0.0530115976188993	2052	1
astrocyte	hsa04912	GnRH signaling pathway	1/13	93/8146	0.138758914175403	0.167667021295279	0.054773255595554	1956	1
astrocyte	hsa04070	Phosphatidylinositol signaling system	1/13	97/8146	0.14430771749861	0.171513270797528	0.056029743636216	5290	1
astrocyte	hsa04666	Fc gamma R-mediated phagocytosis	1/13	97/8146	0.14430771749861	0.171513270797528	0.056029743636216	5290	1
astrocyte	hsa04750	Inflammatory mediator regulation of TRP channels	1/13	98/8146	0.145689752493332	0.171748082207586	0.0561064515378684	5290	1
astrocyte	hsa03013	Nucleocytoplasmic transport	1/13	108/8146	0.159397228215171	0.184900784729598	0.0604031601657488	1915	1
astrocyte	hsa04725	Cholinergic synapse	1/13	113/8146	0.166174565918454	0.191232635382347	0.0624716413227269	5290	1
astrocyte	hsa04670	Leukocyte transendothelial migration	1/13	114/8146	0.167523965973609	0.191267520206089	0.0624830374538947	5290	1
astrocyte	hsa04726	Serotonergic synapse	1/13	115/8146	0.168871349992825	0.191299576163747	0.0624935094545815	351	1
astrocyte	hsa05022	Pathways of neurodegeneration - multiple diseases	2/13	476/8146	0.173937182566944	0.194336768208532	0.0634856956035134	3309/351	2
astrocyte	hsa04071	Sphingolipid signaling pathway	1/13	119/8146	0.174240780885724	0.194336768208532	0.0634856956035134	5290	1
astrocyte	hsa04152	AMPK signaling pathway	1/13	120/8146	0.175578126076765	0.194336768208532	0.0634856956035134	5290	1
astrocyte	hsa04919	Thyroid hormone signaling pathway	1/13	121/8146	0.176913471748457	0.194336768208532	0.0634856956035134	5290	1
astrocyte	hsa04611	Platelet activation	1/13	124/8146	0.180907539038109	0.197230023763352	0.0644308607575378	5290	1
astrocyte	hsa04110	Cell cycle	1/13	126/8146	0.183560303124315	0.198628686216609	0.064887774081651	5925	1
astrocyte	hsa04650	Natural killer cell mediated cytotoxicity	1/13	131/8146	0.190157556183773	0.204243301086274	0.0667219495381659	5290	1
astrocyte	hsa04140	Autophagy - animal	1/13	141/8146	0.203204682025948	0.216652050689429	0.0707756245446412	5290	1
astrocyte	hsa05017	Spinocerebellar ataxia	1/13	143/8146	0.205790709324323	0.217807685051291	0.0711531457517829	5290	1
astrocyte	hsa04921	Oxytocin signaling pathway	1/13	154/8146	0.219875909317308	0.231029035152244	0.0754722800860325	1956	1
astrocyte	hsa04360	Axon guidance	1/13	182/8146	0.25469529756623	0.265689339187794	0.0867950654333991	5290	1
astrocyte	hsa04613	Neutrophil extracellular trap formation	1/13	190/8146	0.264376863328194	0.273818894161344	0.0894508184193138	5290	1
astrocyte	hsa05415	Diabetic cardiomyopathy	1/13	203/8146	0.279862130527999	0.287801481748651	0.0940186328761473	5290	1
astrocyte	hsa04020	Calcium signaling pathway	1/13	240/8146	0.322304055963324	0.329113296582267	0.107514325562265	1956	1
astrocyte	hsa04144	Endocytosis	1/13	251/8146	0.334469249433042	0.339147141033504	0.110792169484629	1956	1
astrocyte	hsa05012	Parkinson disease	1/13	266/8146	0.350733446074329	0.353169095005401	0.115372844103398	3309	1
astrocyte	hsa05014	Amyotrophic lateral sclerosis	1/13	364/8146	0.448286063890855	0.448286063890855	0.146445538113165	3309	1
microglia	hsa05235	PD-L1 expression and PD-1 checkpoint pathway in cancer	6/17	89/8146	1.61206483551044e-08	2.3492e-06	7.57575e-07	5728/5290/1432/5894/4792/3725	6
microglia	hsa05215	Prostate cancer	6/17	97/8146	2.71583465601684e-08	2.3492e-06	7.57575e-07	5728/5290/3480/5894/4792/2932	6
microglia	hsa04660	T cell receptor signaling pathway	6/17	104/8146	4.13632259050158e-08	2.38528e-06	7.69211e-07	5290/1432/5894/4792/3725/2932	6
microglia	hsa04510	Focal adhesion	7/17	201/8146	7.91491469803072e-08	3.21605e-06	1.03712e-06	5728/5290/3480/5894/6696/3725/2932	7
microglia	hsa04722	Neurotrophin signaling pathway	6/17	119/8146	9.29493397742589e-08	3.21605e-06	1.03712e-06	5290/1432/5894/4792/3725/2932	6
microglia	hsa05417	Lipid and atherosclerosis	7/17	215/8146	1.25747217563064e-07	3.62571e-06	1.16923e-06	5290/3309/5468/1432/4792/3725/2932	7
microglia	hsa05224	Breast cancer	6/17	147/8146	3.27607145959507e-07	8.09658e-06	2.611e-06	5728/5290/3480/5894/3725/2932	6
microglia	hsa01521	EGFR tyrosine kinase inhibitor resistance	5/17	79/8146	4.2642933293078e-07	9.22153e-06	2.97378e-06	5728/5290/3480/5894/2932	5
microglia	hsa04662	B cell receptor signaling pathway	5/17	82/8146	5.1435215580303e-07	9.88699e-06	3.18838e-06	5290/5894/4792/3725/2932	5
microglia	hsa01522	Endocrine resistance	5/17	98/8146	1.25510293360953e-06	2.08471e-05	6.72281e-06	5290/3480/1432/5894/3725	5
microglia	hsa05142	Chagas disease	5/17	102/8146	1.53176583705437e-06	2.08471e-05	6.72281e-06	5290/1432/8837/4792/3725	5
microglia	hsa05167	Kaposi sarcoma-associated herpesvirus infection	6/17	194/8146	1.67979318940512e-06	2.08471e-05	6.72281e-06	5290/1432/5894/4792/3725/2932	6
microglia	hsa04620	Toll-like receptor signaling pathway	5/17	104/8146	1.68704555667217e-06	2.08471e-05	6.72281e-06	5290/1432/6696/4792/3725	5
microglia	hsa04625	C-type lectin receptor signaling pathway	5/17	104/8146	1.68704555667217e-06	2.08471e-05	6.72281e-06	5290/1432/5894/4792/3725	5
microglia	hsa04668	TNF signaling pathway	5/17	112/8146	2.43678776367497e-06	2.81043e-05	9.06314e-06	5290/1432/8837/4792/3725	5
microglia	hsa05208	Chemical carcinogenesis - reactive oxygen species	6/17	223/8146	3.78334930568445e-06	4.09075e-05	1.31919e-05	5728/5290/1432/5894/4792/3725	6
microglia	hsa04380	Osteoclast differentiation	5/17	128/8146	4.71129940234225e-06	4.56713e-05	1.47282e-05	5290/5468/1432/4792/3725	5
microglia	hsa04926	Relaxin signaling pathway	5/17	129/8146	4.89519900994666e-06	4.56713e-05	1.47282e-05	5290/1432/5894/4792/3725	5
microglia	hsa05213	Endometrial cancer	4/17	58/8146	5.13995408101187e-06	4.56713e-05	1.47282e-05	5728/5290/5894/2932	4
microglia	hsa04068	FoxO signaling pathway	5/17	131/8146	5.27992284847853e-06	4.56713e-05	1.47282e-05	5728/5290/3480/1432/5894	5
microglia	hsa04210	Apoptosis	5/17	136/8146	6.34628779638341e-06	5.1731e-05	1.66824e-05	5290/5894/8837/4792/3725	5
microglia	hsa05135	Yersinia infection	5/17	137/8146	6.57851282019649e-06	5.1731e-05	1.66824e-05	5290/1432/4792/3725/2932	5
microglia	hsa04140	Autophagy - animal	5/17	141/8146	7.57503388773981e-06	5.69774e-05	1.83742e-05	5728/5290/3480/5894/8837	5
microglia	hsa04550	Signaling pathways regulating pluripotency of stem cells	5/17	143/8146	8.11580407774658e-06	5.85014e-05	1.88657e-05	5290/3480/1432/5894/2932	5
microglia	hsa04917	Prolactin signaling pathway	4/17	70/8146	1.09384612367998e-05	7.27828e-05	2.34712e-05	5290/1432/5894/2932	4
microglia	hsa05230	Central carbon metabolism in cancer	4/17	70/8146	1.09384612367998e-05	7.27828e-05	2.34712e-05	5728/5290/5894/5315	4
microglia	hsa04932	Non-alcoholic fatty liver disease	5/17	155/8146	1.20292895400723e-05	7.38397e-05	2.3812e-05	5290/5468/1432/3725/2932	5
microglia	hsa05218	Melanoma	4/17	72/8146	1.22419220480727e-05	7.38397e-05	2.3812e-05	5728/5290/3480/5894	4
microglia	hsa04150	mTOR signaling pathway	5/17	156/8146	1.24121853790323e-05	7.38397e-05	2.3812e-05	5728/5290/3480/5894/2932	5
microglia	hsa05160	Hepatitis C	5/17	157/8146	1.2804567228468e-05	7.38397e-05	2.3812e-05	5290/5894/8837/4792/2932	5
microglia	hsa05214	Glioma	4/17	75/8146	1.44075172166083e-05	8.04032e-05	2.59286e-05	5728/5290/3480/5894	4
microglia	hsa05161	Hepatitis B	5/17	162/8146	1.49146913183345e-05	8.06325e-05	2.60026e-05	5290/1432/5894/4792/3725	5
microglia	hsa05225	Hepatocellular carcinoma	5/17	168/8146	1.77960024541931e-05	9.32942e-05	3.00857e-05	5728/5290/3480/5894/2932	5
microglia	hsa04012	ErbB signaling pathway	4/17	85/8146	2.36951700610541e-05	0.000120567	3.88806e-05	5290/5894/3725/2932	4
microglia	hsa05210	Colorectal cancer	4/17	86/8146	2.48191652589427e-05	0.000122678	3.95614e-05	5290/5894/3725/2932	4
microglia	hsa04657	IL-17 signaling pathway	4/17	94/8146	3.52771449214368e-05	0.000169526	5.46693e-05	1432/4792/3725/2932	4
microglia	hsa05165	Human papillomavirus infection	6/17	331/8146	3.63987356132038e-05	0.000170189	5.48829e-05	5728/5290/5894/5315/6696/2932	6
microglia	hsa04914	Progesterone-mediated oocyte maturation	4/17	102/8146	4.86574636000154e-05	0.00022152	7.14362e-05	5290/3480/1432/5894	4
microglia	hsa04151	PI3K-Akt signaling pathway	6/17	354/8146	5.31529177984229e-05	0.000235781	7.60352e-05	5728/5290/3480/5894/6696/2932	6
microglia	hsa05170	Human immunodeficiency virus 1 infection	5/17	212/8146	5.45908121835005e-05	0.000236105	7.61398e-05	5290/1432/5894/4792/3725	5
microglia	hsa04931	Insulin resistance	4/17	108/8146	6.08903988768925e-05	0.000256928	8.28547e-05	5728/5290/4792/2932	4
microglia	hsa05163	Human cytomegalovirus infection	5/17	225/8146	7.25288743776277e-05	0.00029875	9.63416e-05	5290/1432/5894/4792/2932	5
microglia	hsa04071	Sphingolipid signaling pathway	4/17	119/8146	8.89571937029384e-05	0.000349764	0.000112793	5728/5290/1432/5894	4
microglia	hsa04935	Growth hormone synthesis
microglia	hsa05131	Shigellosis	5/17	247/8146	0.00011295179751622	0.000434237	0.000140034	5290/1432/4792/3725/2932	5
microglia	hsa05132	Salmonella infection	5/17	249/8146	0.000117344442370103	0.000441317	0.000142317	5290/1432/5894/4792/3725	5
microglia	hsa05162	Measles	4/17	139/8146	0.000162590013813731	0.00059847	0.000192996	5290/4792/3725/2932	4
microglia	hsa04370	VEGF signaling pathway	3/17	59/8146	0.000228349701915631	0.00082301	0.000265406	5290/1432/5894	3
microglia	hsa04218	Cellular senescence	4/17	156/8146	0.000253576106686084	0.000895279	0.000288712	5728/5290/1432/5894	4
microglia	hsa04929	GnRH secretion	3/17	64/8146	0.000290773104600799	0.00100607	0.000324442	5290/5894/6696	3
microglia	hsa05221	Acute myeloid leukemia	3/17	67/8146	0.000333036560242709	0.00112971	0.000364312	5467/5290/5894	3
microglia	hsa04664	Fc epsilon RI signaling pathway	3/17	68/8146	0.000347957918122689	0.00115763	0.000373315	5290/1432/5894	3
microglia	hsa05211	Renal cell carcinoma	3/17	69/8146	0.000363304794480103	0.00118588	0.000382426	5290/5894/3725	3
microglia	hsa05120	Epithelial cell signaling in Helicobacter pylori infection	3/17	70/8146	0.000379082391490997	0.00121447	0.000391645	1432/4792/3725	3
microglia	hsa04621	NOD-like receptor signaling pathway	4/17	184/8146	0.000476205881721005	0.00149237	0.000481264	1432/7226/4792/3725	4
microglia	hsa05220	Chronic myeloid leukemia	3/17	76/8146	0.000483080503703423	0.00149237	0.000481264	5290/5894/4792	3
microglia	hsa05140	Leishmaniasis	3/17	77/8146	0.00050201619366192	0.00152366	0.000491355	1432/4792/3725	3
microglia	hsa04062	Chemokine signaling pathway	4/17	192/8146	0.000559560242267104	0.00166903	0.000538234	5290/5894/4792/2932	4
microglia	hsa05169	Epstein-Barr virus infection	4/17	202/8146	0.000677838647523489	0.00198756	0.000640954	5290/1432/4792/3725	4
microglia	hsa05415	Diabetic cardiomyopathy	4/17	203/8146	0.000690572135175871	0.00199115	0.000642111	5728/5290/1432/2932	4
microglia	hsa05203	Viral carcinogenesis	4/17	204/8146	0.000703475472131636	0.0019951	0.000643386	5290/5315/4792/3725	4
microglia	hsa05205	Proteoglycans in cancer	4/17	205/8146	0.000716549959916425	0.00199941	0.000644773	5290/3480/1432/5894	4
microglia	hsa04211	Longevity regulating pathway	3/17	89/8146	0.00076738664228471	0.00210727	0.000679557	5290/3480/5468	3
microglia	hsa04015	Rap1 signaling pathway	4/17	210/8146	0.000784535312808173	0.0021207	0.000683888	5290/3480/1432/5894	4
microglia	hsa04658	Th1 and Th2 cell differentiation	3/17	92/8146	0.000845301168579932	0.00221571	0.000714529	1432/4792/3725	3
microglia	hsa05222	Small cell lung cancer	3/17	92/8146	0.000845301168579932	0.00221571	0.000714529	5728/5290/4792	3
microglia	hsa04912	GnRH signaling pathway	3/17	93/8146	0.000872350561763273	0.00225249	0.000726388	1432/5894/3725	3
microglia	hsa04024	cAMP signaling pathway	4/17	221/8146	0.000950085455491851	0.00241713	0.000779482	5290/5894/4792/3725	4
microglia	hsa05166	Human T-cell leukemia virus 1 infection	4/17	222/8146	0.000966269890305409	0.00242268	0.000781271	5728/5290/4792/3725	4
microglia	hsa05231	Choline metabolism in cancer	3/17	98/8146	0.00101588263688936	0.00251068	0.000809651	5290/5894/3725	3
microglia	hsa04933	AGE-RAGE signaling pathway in diabetic complications	3/17	100/8146	0.00107724374744668	0.00262483	0.000846463	5290/1432/3725	3
microglia	hsa05171	Coronavirus disease - COVID-19	4/17	232/8146	0.00113904612535023	0.00273687	0.000882594	5290/1432/4792/3725	4
microglia	hsa04659	Th17 cell differentiation	3/17	108/8146	0.00134610461570482	0.00319008	0.00102875	1432/4792/3725	3
microglia	hsa04152	AMPK signaling pathway	3/17	120/8146	0.00182324156640933	0.00426244	0.00137456	5290/3480/5468	3
microglia	hsa04919	Thyroid hormone signaling pathway	3/17	121/8146	0.00186718177963472	0.00430697	0.00138892	5290/5894/2932	3
microglia	hsa05020	Prion disease	4/17	273/8146	0.00207932865050894	0.00473321	0.00152638	5290/3309/1432/2932	4
microglia	hsa04910	Insulin signaling pathway	3/17	137/8146	0.00266250350534751	0.00596984	0.00192517	5290/5894/2932	3
microglia	hsa04915	Estrogen signaling pathway	3/17	138/8146	0.00271815659623088	0.00596984	0.00192517	5290/5894/3725	3
microglia	hsa04010	MAPK signaling pathway	4/17	294/8146	0.00272611029355866	0.00596984	0.00192517	3480/1432/5894/3725	4
microglia	hsa05418	Fluid shear stress and atherosclerosis	3/17	139/8146	0.00277452938849008	0.00599992	0.00193487	5290/1432/3725	3
microglia	hsa04936	Alcoholic liver disease	3/17	142/8146	0.00294799839139213	0.00629634	0.00203046	1432/4792/2932	3
microglia	hsa05226	Gastric cancer	3/17	149/8146	0.00337854471165927	0.00712791	0.00229862	5290/5894/2932	3
microglia	hsa04921	Oxytocin signaling pathway	3/17	154/8146	0.00370864039069638	0.00773006	0.00249281	5894/7226/3725	3
microglia	hsa04930	Type II diabetes mellitus	2/17	46/8146	0.00402001103195356	0.00827931	0.00266993	5290/5315	2
microglia	hsa04630	JAK-STAT signaling pathway	3/17	162/8146	0.00427692006274918	0.00870479	0.00280714	5290/2670/5894	3
microglia	hsa04310	Wnt signaling pathway	3/17	167/8146	0.00465771843797929	0.0093696	0.00302153	5467/3725/2932	3
microglia	hsa05164	Influenza A	3/17	171/8146	0.00497682074264397	0.00989644	0.00319143	5290/5894/4792	3
microglia	hsa04360	Axon guidance	3/17	182/8146	0.00592202555816419	0.0116422	0.00375439	5290/5894/2932	3
microglia	hsa04613	Neutrophil extracellular trap formation	3/17	190/8146	0.00667316506550216	0.0129714	0.00418306	5290/1432/5894	3
microglia	hsa04730	Long-term depression	2/17	60/8146	0.00675793323908709	0.0129902	0.00418913	3480/5894	2
microglia	hsa05202	Transcriptional misregulation in cancer	3/17	193/8146	0.00696894509310882	0.0132487	0.00427246	3480/5468/860	3
microglia	hsa04213	Longevity regulating pathway - multiple species	2/17	62/8146	0.00720226296514358	0.0135434	0.00436751	5290/3480	2
microglia	hsa05130	Pathogenic Escherichia coli infection	3/17	197/8146	0.00737543079667735	0.0137199	0.00442442	1432/4792/3725	3
microglia	hsa05207	Chemical carcinogenesis - receptor activation	3/17	212/8146	0.00902506758512064	0.0165869	0.00534899	5290/5894/3725	3
microglia	hsa04622	RIG-I-like receptor signaling pathway	2/17	70/8146	0.00910842464357732	0.0165869	0.00534899	1432/4792	2
microglia	hsa05223	Non-small cell lung cancer	2/17	72/8146	0.00961666563479063	0.01733	0.00558863	5290/5894	2
microglia	hsa00562	Inositol phosphate metabolism	2/17	73/8146	0.00987547167915242	0.017613	0.00567987	5728/5290	2
microglia	hsa03320	PPAR signaling pathway	2/17	75/8146	0.0104023921961724	0.0183634	0.00592188	5467/5468	2
microglia	hsa05133	Pertussis	2/17	76/8146	0.0106704817013743	0.0184599	0.00595301	1432/3725	2
microglia	hsa05212	Pancreatic cancer	2/17	76/8146	0.0106704817013743	0.0184599	0.00595301	5290/5894	2
microglia	hsa04014	Ras signaling pathway	3/17	235/8146	0.0119493724596863	0.0204677	0.00660049	5290/3480/5894	3
microglia	hsa05022	Pathways of neurodegeneration - multiple diseases	4/17	476/8146	0.0149025860302075	0.025276	0.00815105	3309/1432/5894/2932	4
microglia	hsa04070	Phosphatidylinositol signaling system	2/17	97/8146	0.0169905767531376	0.0282632	0.00911438	5728/5290	2
microglia	hsa04666	Fc gamma R-mediated phagocytosis	2/17	97/8146	0.0169905767531376	0.0282632	0.00911438	5290/5894	2
microglia	hsa04750	Inflammatory mediator regulation of TRP channels	2/17	98/8146	0.0173233828805595	0.0285423	0.0092044	5290/1432	2
microglia	hsa04916	Melanogenesis	2/17	101/8146	0.0183385803812429	0.0299299	0.00965188	5894/2932	2
microglia	hsa04064	NF-kappa B signaling pathway	2/17	104/8146	0.0193787021035388	0.0313319	0.010104	8837/4792	2
microglia	hsa04928	Parathyroid hormone synthesis
microglia	hsa04066	HIF-1 signaling pathway	2/17	109/8146	0.0211667787153951	0.033595	0.0108338	5290/3480	2
microglia	hsa05145	Toxoplasmosis	2/17	112/8146	0.0222718456783039	0.0350275	0.0112958	1432/4792	2
microglia	hsa04670	Leukocyte transendothelial migration	2/17	114/8146	0.0230217934542438	0.0358808	0.0115709	5290/1432	2
microglia	hsa05206	MicroRNAs in cancer	3/17	310/8146	0.0249740107706656	0.0385759	0.0124401	5728/5290/5894	3
microglia	hsa04611	Platelet activation	2/17	124/8146	0.0269270148593851	0.0412245	0.0132942	5290/1432	2
microglia	hsa04114	Oocyte meiosis	2/17	131/8146	0.0298107050962152	0.0448457	0.0144619	3480/1432	2
microglia	hsa04650	Natural killer cell mediated cytotoxicity	2/17	131/8146	0.0298107050962152	0.0448457	0.0144619	5290/5894	2
microglia	hsa04728	Dopaminergic synapse	2/17	132/8146	0.0302324864368685	0.0450881	0.0145401	1432/2932	2
microglia	hsa04371	Apelin signaling pathway	2/17	139/8146	0.0332522394932902	0.0491678	0.0158558	5894/6696	2
microglia	hsa04072	Phospholipase D signaling pathway	2/17	148/8146	0.0373035074868339	0.0546907	0.0176368	5290/5894	2
microglia	hsa05010	Alzheimer disease	3/17	384/8146	0.0432211106395262	0.0628341	0.0202629	5290/5894/2932	3
microglia	hsa03060	Protein export	1/17	23/8146	0.04697509642913	0.0677224	0.0218393	3309	1
microglia	hsa05152	Tuberculosis	2/17	180/8146	0.0531386986633093	0.0759752	0.0245007	1432/5894	2
microglia	hsa04810	Regulation of actin cytoskeleton	2/17	218/8146	0.0745084622630809	0.104	0.0335382	5290/5894	2
microglia	hsa04960	Aldosterone-regulated sodium reabsorption	1/17	37/8146	0.0745433490926782	0.104	0.0335382	5290	1
microglia	hsa05216	Thyroid cancer	1/17	37/8146	0.0745433490926782	0.104	0.0335382	5468	1
microglia	hsa05219	Bladder cancer	1/17	41/8146	0.0822810483822135	0.113877	0.0367233	5894	1
microglia	hsa04714	Thermogenesis	2/17	232/8146	0.0829923388449455	0.11395	0.0367468	5468/1432	2
microglia	hsa00620	Pyruvate metabolism	1/17	47/8146	0.0937735149718946	0.126741	0.0408717	5315	1
microglia	hsa04973	Carbohydrate digestion and absorption	1/17	47/8146	0.0937735149718946	0.126741	0.0408717	5290	1
microglia	hsa05030	Cocaine addiction	1/17	49/8146	0.0975741399460978	0.130855	0.0421985	3725	1
microglia	hsa04913	Ovarian steroidogenesis	1/17	51/8146	0.101359759383723	0.134886	0.0434985	3480	1
microglia	hsa04340	Hedgehog signaling pathway	1/17	56/8146	0.110758522865388	0.145161	0.0468118	2932	1
microglia	hsa04923	Regulation of lipolysis in adipocytes	1/17	56/8146	0.110758522865388	0.145161	0.0468118	5290	1
microglia	hsa05134	Legionellosis	1/17	57/8146	0.112627139071975	0.1465	0.0472437	4792	1
microglia	hsa04623	Cytosolic DNA-sensing pathway	1/17	63/8146	0.12376145743864	0.158598	0.0511451	4792	1
microglia	hsa05217	Basal cell carcinoma	1/17	63/8146	0.12376145743864	0.158598	0.0511451	2932	1
microglia	hsa05321	Inflammatory bowel disease	1/17	65/8146	0.127443582962269	0.162116	0.0522795	3725	1
microglia	hsa00010	Glycolysis / Gluconeogenesis	1/17	67/8146	0.13111114205062	0.164364	0.0530045	5315	1
microglia	hsa04720	Long-term potentiation	1/17	67/8146	0.13111114205062	0.164364	0.0530045	5894	1
microglia	hsa04920	Adipocytokine signaling pathway	1/17	69/8146	0.134764188740127	0.16653	0.053703	4792	1
microglia	hsa05031	Amphetamine addiction	1/17	69/8146	0.134764188740127	0.16653	0.053703	3725	1
microglia	hsa04520	Adherens junction	1/17	71/8146	0.138402776880084	0.169813	0.0547618	3480	1
microglia	hsa04137	Mitophagy - animal	1/17	72/8146	0.140216665770862	0.17063	0.0550251	3725	1
microglia	hsa01524	Platinum drug resistance	1/17	73/8146	0.142026960133247	0.17063	0.0550251	5290	1
microglia	hsa04115	p53 signaling pathway	1/17	73/8146	0.142026960133247	0.17063	0.0550251	5728	1
microglia	hsa01230	Biosynthesis of amino acids	1/17	75/8146	0.145636791976438	0.17257	0.0556507	5315	1
microglia	hsa04918	Thyroid hormone synthesis	1/17	75/8146	0.145636791976438	0.17257	0.0556507	3309	1
microglia	hsa05100	Bacterial invasion of epithelial cells	1/17	77/8146	0.149232325701139	0.175627	0.0566367	5290	1
microglia	hsa04612	Antigen processing and presentation	1/17	78/8146	0.151024747372112	0.176536	0.0569297	3309	1
microglia	hsa04512	ECM-receptor interaction	1/17	88/8146	0.168754546289564	0.19463	0.0627648	6696	1
microglia	hsa04540	Gap junction	1/17	88/8146	0.168754546289564	0.19463	0.0627648	5894	1
microglia	hsa05014	Amyotrophic lateral sclerosis	2/17	364/8146	0.174612918135645	0.200053	0.0645137	3309/1432	2
microglia	hsa05323	Rheumatoid arthritis	1/17	93/8146	0.177488197520103	0.20201	0.0651446	3725	1
microglia	hsa05146	Amoebiasis	1/17	102/8146	0.192991536652868	0.218219	0.0703719	5290	1
microglia	hsa04922	Glucagon signaling pathway	1/17	107/8146	0.201485235314249	0.226344	0.0729919	5315	1
microglia	hsa04725	Cholinergic synapse	1/17	113/8146	0.211566613102063	0.236136	0.0761496	5290	1
microglia	hsa01200	Carbon metabolism	1/17	115/8146	0.214900365774679	0.236801	0.0763642	5315	1
microglia	hsa04726	Serotonergic synapse	1/17	115/8146	0.214900365774679	0.236801	0.0763642	5894	1
microglia	hsa04110	Cell cycle	1/17	126/8146	0.233000122890476	0.25512	0.0822719	2932	1
microglia	hsa04270	Vascular smooth muscle contraction	1/17	134/8146	0.24591611405121	0.267569	0.0862864	5894	1
microglia	hsa05017	Spinocerebellar ataxia	1/17	143/8146	0.260201825515389	0.281343	0.0907283	5290	1
microglia	hsa04723	Retrograde endocannabinoid signaling	1/17	148/8146	0.268027871666976	0.288005	0.0928766	1432	1
microglia	hsa04261	Adrenergic signaling in cardiomyocytes	1/17	150/8146	0.271136418300486	0.289547	0.0933738	1432	1
microglia	hsa05168	Herpes simplex virus 1 infection	2/17	495/8146	0.276646186142492	0.293618	0.0946868	5290/4792	2
microglia	hsa04934	Cushing syndrome	1/17	155/8146	0.278853514439686	0.294156	0.0948603	2932	1
microglia	hsa04390	Hippo signaling pathway	1/17	157/8146	0.281918766703665	0.295588	0.0953218	2932	1
microglia	hsa04217	Necroptosis	1/17	159/8146	0.284971753371957	0.296989	0.0957736	8837	1
microglia	hsa04022	cGMP-PKG signaling pathway	1/17	167/8146	0.297061962167065	0.307735	0.0992391	5894	1
microglia	hsa04530	Tight junction	1/17	169/8146	0.300054308010791	0.308984	0.0996421	3725	1
microglia	hsa04141	Protein processing in endoplasmic reticulum	1/17	171/8146	0.303034661999109	0.310207	0.100036	3309	1
microglia	hsa05034	Alcoholism	1/17	187/8146	0.326451161859991	0.332212	0.107133	5894	1
microglia	hsa04144	Endocytosis	1/17	251/8146	0.412915582042957	0.417745	0.134715	3480	1
microglia	hsa05012	Parkinson disease	1/17	266/8146	0.431610945023148	0.43412	0.139996	3309	1
microglia	hsa05016	Huntington disease	1/17	306/8146	0.478763548937681	0.478764	0.154393	5468	1
