# Supplementary material for: Uncovering the pharmacology of Ginkgo biloba folium in the cell-type-specific targets of Parkinson’s disease
Source: Front Pharmacol. 2022 Sep 29;13:1007556. doi: 10.3389/fphar.2022.1007556 (PMC9556873; doi:10.3389/fphar.2022.1007556)
Supplement: Supplementary file 4 [file Table2.XLS]

## Sheet: Sheet1
Table 2. GBF targets for PD by cell types.
cell type	microglia	astrocyte	neuron	oligodendrocyte	OPC	Ependymal	Pericyte	Endothelial
Num. of targets	17	14	25	21	15	9	14	20
GBF targets	PPARD PTEN PIK3CA HSPA5 IGF1R PPARG RUNX2 GFAP MAPK14 RAF1 PKM CFLAR SPP1 TRPM2 NFKBIA JUN GSK3B	HSPB1 GJA1 NPEPPS EGFR IKBKB PIK3CA HSPA5 EPHX1 RB1 STAT3 NFKBIA APP EEF1A1 HSP90AA1	PRKCB GSTP1 ECE1 RUNX1T1 GABRA1 MAPK1 NFKB1 SREBF1 ACACA KCNH2 PPARG CDK6 STAT3 EEF1A1 HSP90AA1 PPARA MAOB AHSA1 PIK3CA IGF1R BCL2L1 CHRM2 INSR AR GRIA2	DCAF5 FASN BCL2 CDK6 SPP1 HSP90AA1 AHSA1 NPEPPS IKBKB SOD1 PIK3CA HSPA5 EPHX1 IGF1R BCL2L1 CA2 INSR PKM NFKB1 ABCC1 PRKCA	RXRA SMAD3 PLAT EGFR SOD1 PIK3CA ERBB3 MAPK8 SPP1 NFKBIA STAT1 EEF1A1 HSP90AA1 TOP1 SPOCK1	HSPA5 PIM1 DUSP1 JUN PRKCA APP HSP90AA1	HSPB1 ABCG2 PTEN IRF1 PRKCB HIF1A ABCB1 GFAP RASA1 STAT3 AKR1C3 NFKBIA PRKCA HSP90AA1	HSPB1 ABCG2 IRF1 AHSA1 EGFR HSPA5 IGF1R CAV1 BCL2L1 RELA HIF1A ABCB1 GFAP STAT3 DUSP1 RUNX1T1 NFKBIA MCL1 PRKCA HSP90AA1
