# Supplementary material for: Uncovering the pharmacology of Ginkgo biloba folium in the cell-type-specific targets of Parkinson’s disease
Source: Front Pharmacol. 2022 Sep 29;13:1007556. doi: 10.3389/fphar.2022.1007556 (PMC9556873; doi:10.3389/fphar.2022.1007556)
Supplement: Supplementary file 6 [file Table5.XLS]

## Sheet: 已恢复_Sheet1
Table 5. Predicted binding scores by DeepPurpose.
Compound	APP	AR	BCL2L1	CDK6	CFLAR	CHRM2	ECE1	EEF1A1	EGFR	GABRA1	GFAP	GRIA2	GSK3B	GSTP1	h-ERN1	h-XBP1s	h-XBP1u	HSP90AA1	HSPA5	HSPB1	IGF1R	IKBKB	INSR	JUN	m-ERN1	m-XBP1s	m-XBP1u	MAOB	MAPK1	MAPK14	NFKBIA	PIK3CA	PKM	PPARA	PPARD	PPARG	PRKCB	PTEN	RAF1	RB1	RUNX1T1	RUNX2	SPP1	SREBF1	STAT3	TRPM2
Fluoranthene	5.72	6.32	5.4	4.92	5.29	7.07	6.04	5.36	6.07	6.79	4.68	5.23	5.73	5.6	5.91	5.2	5.06	5.59	5.75	5.22	5.42	5.79	5.93	5.02	5.93	5.44	5.24	5.71	5.15	6.16	4.57	5.37	5.72	5.36	6	7.05	5.9	5.39	4.72	5.45	5.49	5.62	5.51	5.67	4.44	6.06
Pyrene	6.67	7.62	7.16	6	6.7	8.33	7.35	6.79	7.16	7.78	5.78	6.83	6.11	7.06	7.12	6.51	6.38	7.19	7.04	6.44	6.79	7.11	7.43	6.11	7.09	6.54	6.4	7.04	6.29	7.71	5.87	5.29	7.03	6.62	7.19	7.63	6.93	6.67	5.87	6.87	6.79	7.07	7.18	6.89	5.47	7.06
Sesamin	5.87	6.7	5.63	5.03	5.42	7.39	6.4	5.5	7.12	7.18	4.91	5.33	5.48	5.84	6.27	5.41	5.28	5.38	5.97	5.44	5.77	6.06	6.25	5.22	6.26	5.53	5.41	6.22	5.44	6.62	4.63	5.4	5.86	5.61	6.33	7.15	6.23	5.55	4.95	5.54	5.75	5.9	5.69	5.77	4.61	6.27
Catechin	6.69	7.45	7.37	6.13	6.86	8	7.09	6.82	7.42	7.59	5.92	6.84	6.13	6.85	6.94	6.6	6.51	6.95	6.87	6.46	6.95	6.96	7.11	6.31	6.87	6.6	6.53	6.91	6.55	8.07	6.02	6.02	7.13	6.75	7.32	6.93	7.13	6.6	6.23	6.87	6.84	7.05	7.14	6.74	5.69	6.76
Bilobalide	5.15	5.71	5.58	5.15	5.15	6.43	5.38	5.27	6.54	5.68	4.79	5.18	5.33	5.17	5.14	5.06	5.05	4.58	5.23	5.01	5.41	5.23	5.49	4.98	5.32	5.04	5.04	5.48	5.28	6.37	4.65	4.99	5.14	4.8	5.47	5.91	5.55	5.04	4.9	5.29	5.23	5.28	5.4	5.14	4.83	5.29
Cyanidol	5.57	6.29	5.45	5.12	5.28	6.9	5.88	5.52	7.04	6.32	4.84	5.43	5.38	5.64	5.73	5.3	5.24	4.83	5.69	5.23	5.61	5.73	6.06	5.04	5.64	5.36	5.32	5.87	5.44	6.91	4.68	5.59	5.75	5.43	5.92	6.04	5.85	5.34	5.05	5.5	5.51	5.84	5.69	5.48	4.92	5.67
Quercetin	4.69	5.26	4.71	4.45	4.64	5.68	5.02	4.87	6.54	4.95	4.28	4.78	4.71	4.93	4.81	4.59	4.57	4.32	5.05	4.56	4.53	4.96	4.81	4.44	5.05	4.66	4.63	5.19	4.64	5.94	4.29	5.47	5.05	4.29	4.72	5.37	4.86	4.68	5.16	5.08	4.71	4.8	5.05	4.92	4.32	4.94
Apigenin	4.97	5.56	5.45	4.68	5.1	6.35	5.23	5.37	6.49	5.47	4.41	5.07	4.71	5.24	5.07	4.94	4.84	4.8	5.28	4.94	5.01	5.28	5.43	4.61	5.19	4.91	4.82	5.43	4.79	5.9	4.47	5.08	5.31	4.76	5.36	6.2	5.03	5.22	5.3	5.2	5.08	5.24	5.4	5.12	4.74	5.18
Luteolin	5.21	5.94	5.94	5.3	5.46	6.7	5.51	5.81	6.7	5.9	5.08	5.47	5.02	5.63	5.43	5.52	5.48	5.31	5.62	5.43	5.49	5.5	5.9	5.25	5.43	5.41	5.4	5.65	5.27	6.35	5.2	5.12	5.55	5.37	5.7	6.08	5.44	5.45	5.76	5.55	5.62	5.73	5.77	5.4	5.1	5.39
Chryseriol	5.87	6.47	6.19	5.43	5.76	7.37	6.09	5.97	6.39	6.62	5.27	5.85	5.18	6.13	6.03	5.75	5.7	5.66	5.92	5.7	6.12	5.96	6.47	5.47	5.96	5.8	5.73	6.07	5.63	6.76	5.28	5.27	5.95	5.72	6.3	6.7	6.03	5.71	5.36	5.9	5.91	6.03	6.17	5.76	5.03	6.03
Cosmetin	5.38	5.89	5.9	5.29	5.18	6.81	5.52	5.52	6.69	6.03	4.97	5.46	5.09	5.44	5.47	5.23	5.21	5.27	5.46	5.18	5.65	5.51	6	5.05	5.39	5.21	5.19	5.63	5.17	6.26	4.79	5.11	5.56	5.66	5.81	6.56	5.52	5.26	5.36	5.33	5.49	5.76	5.67	5.29	4.74	5.42
Kaempferol	4.51	4.78	4.03	4.32	4.3	5.33	4.75	4.3	6.22	4.75	4.04	4.33	4.42	4.41	4.59	4.27	4.23	3.95	4.72	4.28	4.25	4.59	4.5	4.2	4.89	4.34	4.27	5	4.38	5.19	4.03	5.03	4.69	4.17	4.42	5.56	4.48	4.53	4.71	4.48	4.34	4.56	4.39	4.59	4.28	4.88
Diosmetin	5.94	6.56	6.49	6.03	6.08	7.22	6.14	6.35	6.13	6.6	5.95	6.07	5.78	6.24	6.01	6.12	6.11	5.77	6.13	6.1	6.1	6.05	6.36	5.9	6.03	6.06	6.05	6.07	5.94	6.69	5.8	5.52	6.06	6.18	6.39	6.6	6.01	5.95	5.79	6.17	6.29	6.2	6.37	5.98	5.47	6.03
Genkwanin	6.57	7.25	7.32	6.14	6.8	7.77	6.92	6.84	6.98	7.36	5.86	6.86	6.22	6.81	6.72	6.62	6.46	6.94	6.85	6.44	6.82	6.74	6.94	6.19	6.65	6.52	6.38	6.69	6.35	7.78	5.97	6.14	6.86	6.68	7.1	6.85	6.9	6.59	6.42	6.79	6.92	6.93	7.14	6.67	5.56	6.63
Isorhamnetin	5.26	5.81	5.13	4.81	4.85	6.61	5.35	5.28	6.45	6	4.61	4.94	4.74	5.33	5.37	5.09	5.11	4.81	5.41	5.06	5.38	5.12	5.84	4.87	5.43	5.17	5.16	5.48	5.07	5.91	4.67	5.34	5.22	4.96	5.52	6.46	5.32	5.07	4.78	5.1	5.13	5.36	5.28	5.02	4.79	5.44
Tricin	5.17	5.91	6	5.35	5.45	6.56	5.51	5.81	6.48	5.77	5.33	5.48	5.07	5.64	5.34	5.57	5.54	5.18	5.59	5.43	5.48	5.52	5.85	5.29	5.4	5.46	5.48	5.61	5.35	6.6	5.46	5.12	5.58	5.29	5.56	5.84	5.37	5.42	5.86	5.57	5.63	5.61	5.78	5.4	5.28	5.35
Syringetin	5.1	5.65	5.64	5.14	5.17	6.31	5.23	5.53	6.46	5.53	4.92	5.28	5.03	5.4	5.21	5.44	5.36	4.73	5.33	5.3	5.24	5.24	5.61	5.15	5.22	5.34	5.35	5.37	5.09	6.37	5.04	5.6	5.35	5.01	5.31	5.64	5.18	5.2	5.56	5.41	5.44	5.36	5.49	5.22	5.18	5.13
Laricitrin	5.3	6.04	5.77	5.46	5.51	6.69	5.63	5.91	6.58	5.97	5.29	5.57	5.16	5.74	5.53	5.71	5.7	5.16	5.71	5.56	5.57	5.63	5.84	5.46	5.51	5.61	5.63	5.73	5.48	6.83	5.44	5.51	5.71	5.42	5.73	5.69	5.52	5.53	5.92	5.7	5.76	5.79	5.88	5.49	5.39	5.47
Isogoycyrol	5.31	5.57	5.92	5.26	5.36	6.53	5.5	5.44	6.2	5.67	5.1	5.39	5.22	5.38	5.29	5.39	5.34	4.95	5.3	5.25	5.46	5.51	5.68	5.2	5.28	5.28	5.28	5.52	5.08	5.96	5.2	5.7	5.47	5.54	5.51	6.14	5.05	5.33	5.51	5.35	5.38	5.53	5.49	5.34	5.61	5.25
Ginkgolide B	6.23	6.89	7.19	5.99	6.32	7.68	6.5	6.37	7.12	6.98	5.86	6.38	6.17	6.41	6.46	6.16	6.11	6.41	6.43	6.01	6.71	6.39	6.95	5.95	6.31	6.1	6.07	6.54	6	7.71	5.68	5.21	6.61	6.47	6.76	6.77	6.56	6.16	6.06	6.31	6.47	6.7	6.67	6.2	5.19	6.29
Dihydrokaempferol	4.76	5.13	4.48	4.48	4.34	5.82	5	4.5	6.38	5.52	4.24	4.32	4.92	4.5	4.64	4.37	4.35	4.18	4.79	4.45	4.52	4.83	4.95	4.29	4.93	4.54	4.45	4.84	4.7	5.58	4.04	4.93	4.82	4.22	4.84	5.67	4.88	4.54	4.47	4.57	4.54	4.6	4.45	4.66	4.26	4.98
Ginkgolide A	7.17	7.92	8.12	6.79	7.23	8.46	7.59	7.29	7.77	8.1	6.65	7.38	7.43	7.38	7.5	7.13	7.04	7.22	7.34	6.92	7.54	7.39	7.71	6.92	7.36	7.08	7.05	7.36	6.94	8.41	6.5	6.46	7.64	7.34	7.81	7.47	7.57	7.06	6.6	7.38	7.42	7.61	7.63	7.17	5.92	7.3
Ginkgolide M	6.06	6.97	6.35	5.31	5.88	7.81	6.7	5.91	6.99	7.15	5.15	5.99	5.95	6.13	6.54	5.7	5.61	5.95	6.2	5.64	6.05	6.34	6.54	5.41	6.5	5.77	5.67	6.58	5.79	7.36	5.03	4.88	6.21	5.94	6.55	7.01	6.4	5.78	5.11	5.99	6	6.19	6.23	6.07	4.76	6.46
Ginkgolide J	7.36	8.06	7.89	6.69	7.22	8.82	7.99	7.23	7.8	8.65	6.48	7.33	7.88	7.51	8.09	7.04	6.93	7.47	7.42	6.95	7.38	7.5	7.68	6.78	7.98	7.14	7.03	7.47	7.08	8.43	6.37	5.74	7.46	7.31	8.07	8.12	8.03	7.09	6.07	7.36	7.34	7.49	7.52	7.35	5.95	7.7
Ginkgolide K	6.77	7.41	7.64	6.69	6.93	8.1	7.14	7.1	7.16	7.67	6.6	7.05	7.23	7.19	7.12	6.93	6.83	6.94	7.06	6.74	7.13	6.84	7.25	6.73	6.98	6.89	6.85	6.85	6.67	7.85	6.46	5.44	7.13	7.14	7.44	7.22	7.23	6.88	6.29	6.97	7.21	7.28	7.3	6.81	5.96	6.92

## Sheet: Sheet1
5280443	Apigenin
73581	Bilobalide
73160	Catechin
5280666	Chryseriol
5280704	Cosmetin
128861	Cyanidol
9838882	Dihydrokaempferol
5281612	Diosmetin
9154	Fluoranthene
5281617	Genkwanin
9909368	Ginkgolide A
6324617	Ginkgolide B
24721483	Ginkgolide J
101553595	Ginkgolide K
12310208	Ginkgolide M
5318570	Isogoycyrol
5281654	Isorhamnetin
5280863	Kaempferol
5282154	Laricitrin
5280445	Luteolin
31423	Pyrene
5280343	Quercetin
72307	Sesamin
5281953	Syringetin
5281702	Tricin
