# Supplementary material for: Uncovering the pharmacology of Ginkgo biloba folium in the cell-type-specific targets of Parkinson’s disease
Source: Front Pharmacol. 2022 Sep 29;13:1007556. doi: 10.3389/fphar.2022.1007556 (PMC9556873; doi:10.3389/fphar.2022.1007556)
Supplement: Supplementary file 8 [file Table3.XLS]

## Sheet: GO_Result_neuron
Table 3. GO analysis results of cell-specific GBF targets.
Cell type	ONTOLOGY	ID	Description	GeneRatio	BgRatio	pvalue	p.adjust	qvalue	geneID	Count
neuron	BP	GO:0043434	response to peptide hormone	9/25	404/18800	1.34760679545514e-09	2.27526955235614e-06	1.17242e-06	PRKCB/NFKB1/SREBF1/PPARG/STAT3/PPARA/PIK3CA/IGF1R/INSR	9
neuron	BP	GO:0071375	cellular response to peptide hormone stimulus	8/25	294/18800	2.7928199452206e-09	2.27526955235614e-06	1.17242e-06	PRKCB/NFKB1/SREBF1/PPARG/STAT3/PIK3CA/IGF1R/INSR	8
neuron	BP	GO:1901654	response to ketone	7/25	190/18800	3.97311330446357e-09	2.27526955235614e-06	1.17242e-06	SREBF1/ACACA/MAOB/PIK3CA/IGF1R/BCL2L1/AR	7
neuron	BP	GO:1901652	response to peptide	9/25	491/18800	7.4015787361849e-09	3.17897806719141e-06	1.63809e-06	PRKCB/NFKB1/SREBF1/PPARG/STAT3/PPARA/PIK3CA/IGF1R/INSR	9
neuron	BP	GO:1901653	cellular response to peptide	8/25	361/18800	1.39132301169971e-08	4.78058586820022e-06	2.46337e-06	PRKCB/NFKB1/SREBF1/PPARG/STAT3/PIK3CA/IGF1R/INSR	8
neuron	BP	GO:0032868	response to insulin	7/25	259/18800	3.37824473805753e-08	9.67304076663805e-06	4.98439e-06	PRKCB/SREBF1/PPARG/PPARA/PIK3CA/IGF1R/INSR	7
neuron	BP	GO:0032869	cellular response to insulin stimulus	6/25	205/18800	2.32778558134831e-07	5.71305089822342e-05	2.94386e-05	PRKCB/SREBF1/PPARG/PIK3CA/IGF1R/INSR	6
neuron	BP	GO:0008286	insulin receptor signaling pathway	5/25	118/18800	4.29857020349911e-07	8.92510432176132e-05	4.59899e-05	PRKCB/SREBF1/PIK3CA/IGF1R/INSR	5
neuron	BP	GO:0035094	response to nicotine	4/25	49/18800	4.94780289238164e-07	8.92510432176132e-05	4.59899e-05	MAPK1/NFKB1/PPARA/IGF1R	4
neuron	BP	GO:0097305	response to alcohol	6/25	235/18800	5.19505490207294e-07	8.92510432176132e-05	4.59899e-05	SREBF1/ACACA/PPARA/MAOB/IGF1R/BCL2L1	6
neuron	BP	GO:0010883	regulation of lipid storage	4/25	55/18800	7.92180595537227e-07	0.00012372420573936	6.37535e-05	NFKB1/SREBF1/PPARG/PPARA	4
neuron	BP	GO:1902893	regulation of miRNA transcription	4/25	59/18800	1.05336159015896e-06	0.000149015696029377	7.67859e-05	SREBF1/PPARG/STAT3/PPARA	4
neuron	BP	GO:0061614	miRNA transcription	4/25	60/18800	1.12759257763789e-06	0.000149015696029377	7.67859e-05	SREBF1/PPARG/STAT3/PPARA	4
neuron	BP	GO:0097284	hepatocyte apoptotic process	3/25	18/18800	1.67280294240141e-06	0.000205276818217545	0.000105776	PPARA/IGF1R/BCL2L1	3
neuron	BP	GO:0048545	response to steroid hormone	6/25	330/18800	3.73517600195236e-06	0.000427802158090277	0.000220441	SREBF1/PPARA/MAOB/PIK3CA/IGF1R/AR	6
neuron	BP	GO:0051896	regulation of protein kinase B signaling	5/25	187/18800	4.17184995140882e-06	0.000447952388532522	0.000230824	HSP90AA1/PPARA/PIK3CA/IGF1R/INSR	5
neuron	BP	GO:0062012	regulation of small molecule metabolic process	6/25	342/18800	4.58695835684331e-06	0.000457899138914785	0.000235949	NFKB1/SREBF1/PPARG/STAT3/PPARA/INSR	6
neuron	BP	GO:0019915	lipid storage	4/25	86/18800	4.79754627500939e-06	0.000457899138914785	0.000235949	NFKB1/SREBF1/PPARG/PPARA	4
neuron	BP	GO:0043491	protein kinase B signaling	5/25	216/18800	8.42051582607223e-06	0.000761391904694321	0.000392335	HSP90AA1/PPARA/PIK3CA/IGF1R/INSR	5
neuron	BP	GO:0010743	regulation of macrophage derived foam cell differentiation	3/25	32/18800	1.00438147220131e-05	0.000862763684620921	0.000444571	NFKB1/PPARG/PPARA	3
neuron	BP	GO:0042789	mRNA transcription by RNA polymerase II	3/25	36/18800	1.44075595674044e-05	0.00115091536980754	0.000593052	SREBF1/PPARG/STAT3	3
neuron	BP	GO:0042593	glucose homeostasis	5/25	244/18800	1.51887393920668e-05	0.00115091536980754	0.000593052	PPARG/STAT3/PIK3CA/IGF1R/INSR	5
neuron	BP	GO:0033500	carbohydrate homeostasis	5/25	245/18800	1.54913581574357e-05	0.00115091536980754	0.000593052	PPARG/STAT3/PIK3CA/IGF1R/INSR	5
neuron	BP	GO:0010742	macrophage derived foam cell differentiation	3/25	38/18800	1.6992857644205e-05	0.00115091536980754	0.000593052	NFKB1/PPARG/PPARA	3
neuron	BP	GO:0045471	response to ethanol	4/25	119/18800	1.74178111845146e-05	0.00115091536980754	0.000593052	SREBF1/PPARA/MAOB/IGF1R	4
neuron	BP	GO:0051897	positive regulation of protein kinase B signaling	4/25	119/18800	1.74178111845146e-05	0.00115091536980754	0.000593052	HSP90AA1/PIK3CA/IGF1R/INSR	4
neuron	BP	GO:0090077	foam cell differentiation	3/25	39/18800	1.83927790186983e-05	0.00117032571681939	0.000603054	NFKB1/PPARG/PPARA	3
neuron	BP	GO:0009299	mRNA transcription	3/25	41/18800	2.14162562537931e-05	0.00131404029442916	0.000677108	SREBF1/PPARG/STAT3	3
neuron	BP	GO:0030522	intracellular receptor signaling pathway	5/25	264/18800	2.21928907085659e-05	0.00131473745645918	0.000677467	SREBF1/PPARG/STAT3/PPARA/AR	5
neuron	BP	GO:0043467	regulation of generation of precursor metabolites and energy	4/25	134/18800	2.7790264620836e-05	0.00152516683241207	0.000785899	STAT3/PPARA/PIK3CA/INSR	4
neuron	BP	GO:0006110	regulation of glycolytic process	3/25	45/18800	2.84082297073261e-05	0.00152516683241207	0.000785899	STAT3/PPARA/INSR	3
neuron	BP	GO:1902895	positive regulation of miRNA transcription	3/25	45/18800	2.84082297073261e-05	0.00152516683241207	0.000785899	SREBF1/PPARG/STAT3	3
neuron	BP	GO:1905953	negative regulation of lipid localization	3/25	47/18800	3.24053323421861e-05	0.00168704124132957	0.000869311	NFKB1/PPARG/PPARA	3
neuron	BP	GO:0062013	positive regulation of small molecule metabolic process	4/25	146/18800	3.88907449048662e-05	0.00196512646313412	0.0010126	SREBF1/PPARG/PPARA/INSR	4
neuron	BP	GO:0045834	positive regulation of lipid metabolic process	4/25	153/18800	4.6699175237784e-05	0.00224748380716309	0.0011581	SREBF1/PPARG/PPARA/IGF1R	4
neuron	BP	GO:0071496	cellular response to external stimulus	5/25	309/18800	4.7095120522626e-05	0.00224748380716309	0.0011581	MAPK1/NFKB1/SREBF1/PPARA/IGF1R	5
neuron	BP	GO:0043470	regulation of carbohydrate catabolic process	3/25	55/18800	5.20633200079828e-05	0.00241742658847877	0.00124567	STAT3/PPARA/INSR	3
neuron	BP	GO:0048638	regulation of developmental growth	5/25	329/18800	6.34268904220646e-05	0.00286756309855545	0.00147762	STAT3/PPARA/PIK3CA/INSR/AR	5
neuron	BP	GO:0019216	regulation of lipid metabolic process	5/25	339/18800	7.3081634237443e-05	0.00321933968256223	0.00165888	NFKB1/SREBF1/PPARG/PPARA/IGF1R	5
neuron	BP	GO:0046890	regulation of lipid biosynthetic process	4/25	175/18800	7.87618341801404e-05	0.00338282077803703	0.00174312	NFKB1/SREBF1/PPARA/IGF1R	4
neuron	BP	GO:0050728	negative regulation of inflammatory response	4/25	182/18800	9.16870878342098e-05	0.0035754286788275	0.00184237	GSTP1/NFKB1/PPARG/PPARA	4
neuron	BP	GO:0010887	negative regulation of cholesterol storage	2/25	11/18800	9.26899377733705e-05	0.0035754286788275	0.00184237	PPARG/PPARA	2
neuron	BP	GO:0071394	cellular response to testosterone stimulus	2/25	11/18800	9.26899377733705e-05	0.0035754286788275	0.00184237	IGF1R/AR	2
neuron	BP	GO:0006109	regulation of carbohydrate metabolic process	4/25	183/18800	9.36520899576471e-05	0.0035754286788275	0.00184237	NFKB1/STAT3/PPARA/INSR	4
neuron	BP	GO:0008217	regulation of blood pressure	4/25	183/18800	9.36520899576471e-05	0.0035754286788275	0.00184237	ECE1/PPARG/PPARA/AR	4
neuron	BP	GO:0050810	regulation of steroid biosynthetic process	3/25	72/18800	0.000116603409242451	0.00435488384953327	0.00224402	NFKB1/SREBF1/IGF1R	3
neuron	BP	GO:0010745	negative regulation of macrophage derived foam cell differentiation	2/25	13/18800	0.000131236952026183	0.00469718924127046	0.0024204	PPARG/PPARA	2
neuron	BP	GO:0045820	negative regulation of glycolytic process	2/25	13/18800	0.000131236952026183	0.00469718924127046	0.0024204	STAT3/PPARA	2
neuron	BP	GO:0045913	positive regulation of carbohydrate metabolic process	3/25	77/18800	0.000142391234636076	0.00497141121998314	0.0025617	NFKB1/PPARA/INSR	3
neuron	BP	GO:0009615	response to virus	5/25	392/18800	0.000144686007566448	0.00497141121998314	0.0025617	NFKB1/CDK6/HSP90AA1/BCL2L1/CHRM2	5
neuron	BP	GO:0006631	fatty acid metabolic process	5/25	395/18800	0.000149934686632161	0.00498098868540032	0.00256664	GSTP1/SREBF1/ACACA/PPARG/PPARA	5
neuron	BP	GO:0030238	male sex determination	2/25	14/18800	0.00015298497293013	0.00498098868540032	0.00256664	INSR/AR	2
neuron	BP	GO:0048708	astrocyte differentiation	3/25	79/18800	0.000153662631156122	0.00498098868540032	0.00256664	MAPK1/CDK6/STAT3	3
neuron	BP	GO:0006096	glycolytic process	3/25	81/18800	0.000165499292458449	0.00526532934154843	0.00271316	STAT3/PPARA/INSR	3
neuron	BP	GO:0006757	ATP generation from ADP	3/25	82/18800	0.00017163348134465	0.00536120583545654	0.00276256	STAT3/PPARA/INSR	3
neuron	BP	GO:0010889	regulation of sequestering of triglyceride	2/25	15/18800	0.000176377243881045	0.00541100187477922	0.00278822	PPARG/PPARA	2
neuron	BP	GO:0046889	positive regulation of lipid biosynthetic process	3/25	85/18800	0.000190917977596999	0.00575433483353762	0.00296513	SREBF1/PPARA/IGF1R	3
neuron	BP	GO:1900542	regulation of purine nucleotide metabolic process	3/25	86/18800	0.000197645222102613	0.00585438778572912	0.00301669	STAT3/PPARA/INSR	3
neuron	BP	GO:0061684	chaperone-mediated autophagy	2/25	16/18800	0.00020140970448303	0.00586477749664146	0.00302204	EEF1A1/HSP90AA1	2
neuron	BP	GO:0009743	response to carbohydrate	4/25	226/18800	0.000210944964568961	0.00595829017426197	0.00307023	PRKCB/SREBF1/PIK3CA/IGF1R	4
neuron	BP	GO:0006140	regulation of nucleotide metabolic process	3/25	88/18800	0.000211557450890559	0.00595829017426197	0.00307023	STAT3/PPARA/INSR	3
neuron	BP	GO:1903578	regulation of ATP metabolic process	3/25	89/18800	0.000218745454480404	0.00606136598060217	0.00312334	STAT3/PPARA/INSR	3
neuron	BP	GO:0046031	ADP metabolic process	3/25	90/18800	0.000226090053741313	0.00616543987821548	0.00317697	STAT3/PPARA/INSR	3
neuron	BP	GO:0048608	reproductive structure development	5/25	433/18800	0.000229918763477541	0.00617188180710023	0.00318029	MAPK1/PPARG/BCL2L1/INSR/AR	5
neuron	BP	GO:0061458	reproductive system development	5/25	436/18800	0.00023739507201087	0.00627453436484114	0.00323319	MAPK1/PPARG/BCL2L1/INSR/AR	5
neuron	BP	GO:0019217	regulation of fatty acid metabolic process	3/25	92/18800	0.000241255012022817	0.00627994107053334	0.00323597	SREBF1/PPARG/PPARA	3
neuron	BP	GO:0050673	epithelial cell proliferation	5/25	443/18800	0.000255562655525047	0.00634815898739744	0.00327112	MAPK1/PPARG/CDK6/STAT3/AR	5
neuron	BP	GO:0030730	sequestering of triglyceride	2/25	18/18800	0.000256378988812354	0.00634815898739744	0.00327112	PPARG/PPARA	2
neuron	BP	GO:1901655	cellular response to ketone	3/25	94/18800	0.000257064211659398	0.00634815898739744	0.00327112	ACACA/IGF1R/AR	3
neuron	BP	GO:0031667	response to nutrient levels	5/25	446/18800	0.000263665965477059	0.00634815898739744	0.00327112	MAPK1/SREBF1/PPARG/PPARA/IGF1R	5
neuron	BP	GO:0003012	muscle system process	5/25	449/18800	0.000271964084455418	0.00634815898739744	0.00327112	KCNH2/PPARG/PPARA/PIK3CA/CHRM2	5
neuron	BP	GO:2001237	negative regulation of extrinsic apoptotic signaling pathway	3/25	97/18800	0.000282011730437674	0.00634815898739744	0.00327112	GSTP1/BCL2L1/AR	3
neuron	BP	GO:0010885	regulation of cholesterol storage	2/25	19/18800	0.000286307727471611	0.00634815898739744	0.00327112	PPARG/PPARA	2
neuron	BP	GO:1902894	negative regulation of miRNA transcription	2/25	19/18800	0.000286307727471611	0.00634815898739744	0.00327112	PPARG/PPARA	2
neuron	BP	GO:0051403	stress-activated MAPK cascade	4/25	245/18800	0.000287021591302644	0.00634815898739744	0.00327112	GSTP1/MAPK1/NFKB1/IGF1R	4
neuron	BP	GO:0060047	heart contraction	4/25	247/18800	0.0002960378476529	0.00634815898739744	0.00327112	SREBF1/KCNH2/PIK3CA/CHRM2	4
neuron	BP	GO:0006165	nucleoside diphosphate phosphorylation	3/25	99/18800	0.000299482912042147	0.00634815898739744	0.00327112	STAT3/PPARA/INSR	3
neuron	BP	GO:0022411	cellular component disassembly	5/25	460/18800	0.000304108171874181	0.00634815898739744	0.00327112	PRKCB/SREBF1/PIK3CA/IGF1R/INSR	5
neuron	BP	GO:0046939	nucleotide phosphorylation	3/25	100/18800	0.000308474695619868	0.00634815898739744	0.00327112	STAT3/PPARA/INSR	3
neuron	BP	GO:0051051	negative regulation of transport	5/25	464/18800	0.000316487431231626	0.00634815898739744	0.00327112	PRKCB/NFKB1/SREBF1/KCNH2/MAOB	5
neuron	BP	GO:0042953	lipoprotein transport	2/25	20/18800	0.000317860485624462	0.00634815898739744	0.00327112	PRKCB/PPARG	2
neuron	BP	GO:0097062	dendritic spine maintenance	2/25	20/18800	0.000317860485624462	0.00634815898739744	0.00327112	IGF1R/INSR	2
neuron	BP	GO:0031098	stress-activated protein kinase signaling cascade	4/25	252/18800	0.00031946882207656	0.00634815898739744	0.00327112	GSTP1/MAPK1/NFKB1/IGF1R	4
neuron	BP	GO:0071560	cellular response to transforming growth factor beta stimulus	4/25	252/18800	0.00031946882207656	0.00634815898739744	0.00327112	PPARG/STAT3/PPARA/IGF1R	4
neuron	BP	GO:0043255	regulation of carbohydrate biosynthetic process	3/25	102/18800	0.000326977826584744	0.00634815898739744	0.00327112	NFKB1/PPARA/INSR	3
neuron	BP	GO:0062014	negative regulation of small molecule metabolic process	3/25	102/18800	0.000326977826584744	0.00634815898739744	0.00327112	NFKB1/STAT3/PPARA	3
neuron	BP	GO:0009135	purine nucleoside diphosphate metabolic process	3/25	103/18800	0.000336492027801894	0.00634815898739744	0.00327112	STAT3/PPARA/INSR	3
neuron	BP	GO:0009179	purine ribonucleoside diphosphate metabolic process	3/25	103/18800	0.000336492027801894	0.00634815898739744	0.00327112	STAT3/PPARA/INSR	3
neuron	BP	GO:0003015	heart process	4/25	257/18800	0.000344205182098048	0.00634815898739744	0.00327112	SREBF1/KCNH2/PIK3CA/CHRM2	4
neuron	BP	GO:0019218	regulation of steroid metabolic process	3/25	104/18800	0.000346183212386608	0.00634815898739744	0.00327112	NFKB1/SREBF1/IGF1R	3
neuron	BP	GO:0071559	response to transforming growth factor beta	4/25	258/18800	0.00034931280038426	0.00634815898739744	0.00327112	PPARG/STAT3/PPARA/IGF1R	4
neuron	BP	GO:0010878	cholesterol storage	2/25	21/18800	0.000351033238534783	0.00634815898739744	0.00327112	PPARG/PPARA	2
neuron	BP	GO:0038083	peptidyl-tyrosine autophosphorylation	2/25	21/18800	0.000351033238534783	0.00634815898739744	0.00327112	IGF1R/INSR	2
neuron	BP	GO:0044872	lipoprotein localization	2/25	21/18800	0.000351033238534783	0.00634815898739744	0.00327112	PRKCB/PPARG	2
neuron	BP	GO:1900543	negative regulation of purine nucleotide metabolic process	2/25	21/18800	0.000351033238534783	0.00634815898739744	0.00327112	STAT3/PPARA	2
neuron	BP	GO:1903522	regulation of blood circulation	4/25	260/18800	0.000359691086222411	0.00642253801292913	0.00330945	ECE1/SREBF1/KCNH2/CHRM2	4
neuron	BP	GO:0006090	pyruvate metabolic process	3/25	106/18800	0.000366102175574313	0.00642253801292913	0.00330945	STAT3/PPARA/INSR	3
neuron	BP	GO:0009991	response to extracellular stimulus	5/25	479/18800	0.000366361306907482	0.00642253801292913	0.00330945	MAPK1/SREBF1/PPARG/PPARA/IGF1R	5
neuron	BP	GO:0007530	sex determination	2/25	22/18800	0.000385821968566482	0.00644840052130241	0.00332278	INSR/AR	2
neuron	BP	GO:0010888	negative regulation of lipid storage	2/25	22/18800	0.000385821968566482	0.00644840052130241	0.00332278	PPARG/PPARA	2
neuron	BP	GO:0045980	negative regulation of nucleotide metabolic process	2/25	22/18800	0.000385821968566482	0.00644840052130241	0.00332278	STAT3/PPARA	2
neuron	BP	GO:0046885	regulation of hormone biosynthetic process	2/25	22/18800	0.000385821968566482	0.00644840052130241	0.00332278	NFKB1/IGF1R	2
neuron	BP	GO:0051091	positive regulation of DNA-binding transcription factor activity	4/25	265/18800	0.000386603756515802	0.00644840052130241	0.00332278	PRKCB/PPARG/STAT3/AR	4
neuron	BP	GO:0031348	negative regulation of defense response	4/25	268/18800	0.000403428034084285	0.00666432079381539	0.00343404	GSTP1/NFKB1/PPARG/PPARA	4
neuron	BP	GO:0006091	generation of precursor metabolites and energy	5/25	494/18800	0.000422000354324415	0.00684319376195312	0.00352621	STAT3/PPARA/MAOB/PIK3CA/INSR	5
neuron	BP	GO:0010893	positive regulation of steroid biosynthetic process	2/25	23/18800	0.000422222665172893	0.00684319376195312	0.00352621	SREBF1/IGF1R	2
neuron	BP	GO:0010817	regulation of hormone levels	5/25	496/18800	0.000429877332854359	0.00684419977090566	0.00352673	ECE1/NFKB1/SREBF1/PPARG/IGF1R	5
neuron	BP	GO:0009185	ribonucleoside diphosphate metabolic process	3/25	112/18800	0.000430252372094186	0.00684419977090566	0.00352673	STAT3/PPARA/INSR	3
neuron	BP	GO:0043200	response to amino acid	3/25	114/18800	0.000453137029546453	0.00714210474092483	0.00368023	PIK3CA/IGF1R/BCL2L1	3
neuron	BP	GO:0035994	response to muscle stretch	2/25	24/18800	0.000460231324886187	0.00718797651049518	0.00370387	NFKB1/PIK3CA	2
neuron	BP	GO:0032368	regulation of lipid transport	3/25	118/18800	0.000501223559293054	0.00768841138272738	0.00396174	NFKB1/PPARG/PPARA	3
neuron	BP	GO:1904019	epithelial cell apoptotic process	3/25	118/18800	0.000501223559293054	0.00768841138272738	0.00396174	PPARA/IGF1R/BCL2L1	3
neuron	BP	GO:1904385	cellular response to angiotensin	2/25	26/18800	0.000541056555092789	0.0082259748818532	0.00423874	NFKB1/IGF1R	2
neuron	BP	GO:0043244	regulation of protein-containing complex disassembly	3/25	125/18800	0.000593031982894437	0.00887679848807909	0.0045741	PIK3CA/IGF1R/INSR	3
neuron	BP	GO:0048511	rhythmic process	4/25	297/18800	0.000594197803334747	0.00887679848807909	0.0045741	SREBF1/PPARG/PPARA/IGF1R	4
neuron	BP	GO:0001101	response to acid chemical	3/25	129/18800	0.000650013533213226	0.00962692456948554	0.00496063	PIK3CA/IGF1R/BCL2L1	3
neuron	BP	GO:0009132	nucleoside diphosphate metabolic process	3/25	130/18800	0.000664785396478985	0.00976154966795638	0.00503	STAT3/PPARA/INSR	3
neuron	BP	GO:0010565	regulation of cellular ketone metabolic process	3/25	132/18800	0.000694969779653528	0.0100332611886114	0.00517001	SREBF1/PPARG/PPARA	3
neuron	BP	GO:0035270	endocrine system development	3/25	132/18800	0.000694969779653528	0.0100332611886114	0.00517001	MAPK1/CDK6/INSR	3
neuron	BP	GO:1903579	negative regulation of ATP metabolic process	2/25	30/18800	0.000721827203481794	0.0102487531866258	0.00528105	STAT3/PPARA	2
neuron	BP	GO:1990776	response to angiotensin	2/25	30/18800	0.000721827203481794	0.0102487531866258	0.00528105	NFKB1/IGF1R	2
neuron	BP	GO:0018105	peptidyl-serine phosphorylation	4/25	315/18800	0.000740715363445795	0.0104307294622941	0.00537482	PRKCB/MAPK1/HSP90AA1/PIK3CA	4
neuron	BP	GO:0051384	response to glucocorticoid	3/25	139/18800	0.000807473312787542	0.0111525607261423	0.00574677	MAOB/PIK3CA/IGF1R	3
neuron	BP	GO:0071214	cellular response to abiotic stimulus	4/25	323/18800	0.000813418033434225	0.0111525607261423	0.00574677	NFKB1/PIK3CA/IGF1R/BCL2L1	4
neuron	BP	GO:0104004	cellular response to environmental stimulus	4/25	323/18800	0.000813418033434225	0.0111525607261423	0.00574677	NFKB1/PIK3CA/IGF1R/BCL2L1	4
neuron	BP	GO:0051385	response to mineralocorticoid	2/25	32/18800	0.000821709185949569	0.0111525607261423	0.00574677	MAOB/IGF1R	2
neuron	BP	GO:0008584	male gonad development	3/25	140/18800	0.000824432603154875	0.0111525607261423	0.00574677	BCL2L1/INSR/AR	3
neuron	BP	GO:0046546	development of primary male sexual characteristics	3/25	141/18800	0.000841617395682208	0.0112960834826721	0.00582073	BCL2L1/INSR/AR	3
neuron	BP	GO:0045940	positive regulation of steroid metabolic process	2/25	33/18800	0.000874010520354254	0.0115855089316541	0.00596986	SREBF1/IGF1R	2
neuron	BP	GO:0035264	multicellular organism growth	3/25	143/18800	0.000876668312639716	0.0115855089316541	0.00596986	STAT3/PIK3CA/AR	3
neuron	BP	GO:0051235	maintenance of location	4/25	331/18800	0.000891046076800087	0.0116425324639288	0.00599925	NFKB1/SREBF1/PPARG/PPARA	4
neuron	BP	GO:0014065	phosphatidylinositol 3-kinase signaling	3/25	144/18800	0.000894536836576603	0.0116425324639288	0.00599925	PIK3CA/IGF1R/INSR	3
neuron	BP	GO:0032496	response to lipopolysaccharide	4/25	333/18800	0.000911244143207067	0.0117708078047349	0.00606534	GSTP1/MAPK1/NFKB1/MAOB	4
neuron	BP	GO:0051973	positive regulation of telomerase activity	2/25	34/18800	0.000927880170202869	0.0118962547194666	0.00612999	MAPK1/HSP90AA1	2
neuron	BP	GO:0010506	regulation of autophagy	4/25	336/18800	0.000942146183906363	0.0119896825477862	0.00617813	SREBF1/STAT3/EEF1A1/PIK3CA	4
neuron	BP	GO:0071322	cellular response to carbohydrate stimulus	3/25	147/18800	0.000949528956765866	0.0119947849097335	0.00618076	PRKCB/PIK3CA/IGF1R	3
neuron	BP	GO:0018209	peptidyl-serine modification	4/25	338/18800	0.000963155025106586	0.0120549543279197	0.00621176	PRKCB/MAPK1/HSP90AA1/PIK3CA	4
neuron	BP	GO:0010821	regulation of mitochondrion organization	3/25	148/18800	0.000968325784198439	0.0120549543279197	0.00621176	SREBF1/PPARG/BCL2L1	3
neuron	BP	GO:0010614	negative regulation of cardiac muscle hypertrophy	2/25	35/18800	0.000983314209199618	0.0120666700814639	0.0062178	PPARG/PPARA	2
neuron	BP	GO:0043243	positive regulation of protein-containing complex disassembly	2/25	35/18800	0.000983314209199618	0.0120666700814639	0.0062178	IGF1R/INSR	2
neuron	BP	GO:0010675	regulation of cellular carbohydrate metabolic process	3/25	150/18800	0.00100662565355846	0.0122651267575421	0.00632006	STAT3/PPARA/INSR	3
neuron	BP	GO:0030224	monocyte differentiation	2/25	36/18800	0.00104030871800151	0.0124778684542049	0.00642968	PPARG/CDK6	2
neuron	BP	GO:0032350	regulation of hormone metabolic process	2/25	36/18800	0.00104030871800151	0.0124778684542049	0.00642968	NFKB1/IGF1R	2
neuron	BP	GO:0016052	carbohydrate catabolic process	3/25	152/18800	0.0010458748878961	0.0124778684542049	0.00642968	STAT3/PPARA/INSR	3
neuron	BP	GO:2001236	regulation of extrinsic apoptotic signaling pathway	3/25	153/18800	0.00106585840214927	0.0125856073951286	0.0064852	GSTP1/BCL2L1/AR	3
neuron	BP	GO:0051092	positive regulation of NF-kappaB transcription factor activity	3/25	154/18800	0.00108608270959559	0.0125856073951286	0.0064852	PRKCB/STAT3/AR	3
neuron	BP	GO:0014741	negative regulation of muscle hypertrophy	2/25	37/18800	0.00109885978420797	0.0125856073951286	0.0064852	PPARG/PPARA	2
neuron	BP	GO:0032094	response to food	2/25	37/18800	0.00109885978420797	0.0125856073951286	0.0064852	SREBF1/PPARA	2
neuron	BP	GO:0048009	insulin-like growth factor receptor signaling pathway	2/25	37/18800	0.00109885978420797	0.0125856073951286	0.0064852	IGF1R/AR	2
neuron	BP	GO:1903580	positive regulation of ATP metabolic process	2/25	37/18800	0.00109885978420797	0.0125856073951286	0.0064852	PPARA/INSR	2
neuron	BP	GO:1905952	regulation of lipid localization	3/25	155/18800	0.00110654895016417	0.012589742360146	0.00648733	NFKB1/PPARG/PPARA	3
neuron	BP	GO:0002237	response to molecule of bacterial origin	4/25	354/18800	0.00114332342753532	0.0128929922345554	0.00664359	GSTP1/MAPK1/NFKB1/MAOB	4
neuron	BP	GO:0031960	response to corticosteroid	3/25	157/18800	0.00114821176477705	0.0128929922345554	0.00664359	MAOB/PIK3CA/IGF1R	3
neuron	BP	GO:0009267	cellular response to starvation	3/25	160/18800	0.00121254868937362	0.013272267361576	0.00683903	MAPK1/SREBF1/PPARA	3
neuron	BP	GO:0032570	response to progesterone	2/25	39/18800	0.00122061597388184	0.013272267361576	0.00683903	SREBF1/IGF1R	2
neuron	BP	GO:0032885	regulation of polysaccharide biosynthetic process	2/25	39/18800	0.00122061597388184	0.013272267361576	0.00683903	NFKB1/INSR	2
neuron	BP	GO:0045923	positive regulation of fatty acid metabolic process	2/25	39/18800	0.00122061597388184	0.013272267361576	0.00683903	PPARG/PPARA	2
neuron	BP	GO:0097242	amyloid-beta clearance	2/25	39/18800	0.00122061597388184	0.013272267361576	0.00683903	IGF1R/INSR	2
neuron	BP	GO:0050680	negative regulation of epithelial cell proliferation	3/25	163/18800	0.00127912357340037	0.0137849453857012	0.0071032	PPARG/CDK6/AR	3
neuron	BP	GO:0097009	energy homeostasis	2/25	40/18800	0.00128381330716658	0.0137849453857012	0.0071032	STAT3/PIK3CA	2
neuron	BP	GO:0009150	purine ribonucleotide metabolic process	4/25	366/18800	0.0012931682150192	0.0137991490273477	0.00711052	ACACA/STAT3/PPARA/INSR	4
neuron	BP	GO:0046661	male sex differentiation	3/25	164/18800	0.00130181766749545	0.013805696004674	0.0071139	BCL2L1/INSR/AR	3
neuron	BP	GO:0033574	response to testosterone	2/25	41/18800	0.0013485516174698	0.0140412829018977	0.00723529	IGF1R/AR	2
neuron	BP	GO:0045429	positive regulation of nitric oxide biosynthetic process	2/25	41/18800	0.0013485516174698	0.0140412829018977	0.00723529	HSP90AA1/INSR	2
neuron	BP	GO:0071548	response to dexamethasone	2/25	41/18800	0.0013485516174698	0.0140412829018977	0.00723529	PIK3CA/IGF1R	2
neuron	BP	GO:0010907	positive regulation of glucose metabolic process	2/25	42/18800	0.00141482702694723	0.0144682906684247	0.00745532	PPARA/INSR	2
neuron	BP	GO:0060964	regulation of miRNA-mediated gene silencing	2/25	42/18800	0.00141482702694723	0.0144682906684247	0.00745532	PPARG/STAT3	2
neuron	BP	GO:0071354	cellular response to interleukin-6	2/25	42/18800	0.00141482702694723	0.0144682906684247	0.00745532	NFKB1/STAT3	2
neuron	BP	GO:0048660	regulation of smooth muscle cell proliferation	3/25	170/18800	0.00144333411137872	0.0146724733925955	0.00756054	PPARG/PIK3CA/IGF1R	3
neuron	BP	GO:1904407	positive regulation of nitric oxide metabolic process	2/25	43/18800	0.00148263566463484	0.0149284556752208	0.00769244	HSP90AA1/INSR	2
neuron	BP	GO:0042326	negative regulation of phosphorylation	4/25	382/18800	0.00151376897436999	0.0149284556752208	0.00769244	GSTP1/PPARG/STAT3/PPARA	4
neuron	BP	GO:0050678	regulation of epithelial cell proliferation	4/25	382/18800	0.00151376897436999	0.0149284556752208	0.00769244	PPARG/CDK6/STAT3/AR	4
neuron	BP	GO:0048659	smooth muscle cell proliferation	3/25	173/18800	0.00151758094703636	0.0149284556752208	0.00769244	PPARG/PIK3CA/IGF1R	3
neuron	BP	GO:0009259	ribonucleotide metabolic process	4/25	384/18800	0.00154308091169969	0.0149284556752208	0.00769244	ACACA/STAT3/PPARA/INSR	4
neuron	BP	GO:0045981	positive regulation of nucleotide metabolic process	2/25	44/18800	0.00155197366643849	0.0149284556752208	0.00769244	PPARA/INSR	2
neuron	BP	GO:0060147	regulation of post-transcriptional gene silencing	2/25	44/18800	0.00155197366643849	0.0149284556752208	0.00769244	PPARG/STAT3	2
neuron	BP	GO:1900368	regulation of post-transcriptional gene silencing by RNA	2/25	44/18800	0.00155197366643849	0.0149284556752208	0.00769244	PPARG/STAT3	2
neuron	BP	GO:1900544	positive regulation of purine nucleotide metabolic process	2/25	44/18800	0.00155197366643849	0.0149284556752208	0.00769244	PPARA/INSR	2
neuron	BP	GO:0006694	steroid biosynthetic process	3/25	175/18800	0.0015683902492779	0.0149284556752208	0.00769244	NFKB1/SREBF1/IGF1R	3
neuron	BP	GO:0007254	JNK cascade	3/25	175/18800	0.0015683902492779	0.0149284556752208	0.00769244	GSTP1/NFKB1/IGF1R	3
neuron	BP	GO:0002253	activation of immune response	4/25	386/18800	0.00157278840350114	0.0149284556752208	0.00769244	PRKCB/MAPK1/HSP90AA1/PIK3CA	4
neuron	BP	GO:0048015	phosphatidylinositol-mediated signaling	3/25	177/18800	0.0016202583741879	0.0151523601459915	0.00780782	PIK3CA/IGF1R/INSR	3
neuron	BP	GO:0010677	negative regulation of cellular carbohydrate metabolic process	2/25	45/18800	0.00162283717512366	0.0151523601459915	0.00780782	STAT3/PPARA	2
neuron	BP	GO:0032881	regulation of polysaccharide metabolic process	2/25	45/18800	0.00162283717512366	0.0151523601459915	0.00780782	NFKB1/INSR	2
neuron	BP	GO:0043409	negative regulation of MAPK cascade	3/25	179/18800	0.0016731935425629	0.0153320773475845	0.00790042	GSTP1/PPARG/IGF1R	3
neuron	BP	GO:0060966	regulation of gene silencing by RNA	2/25	46/18800	0.00169522234030516	0.0153320773475845	0.00790042	PPARG/STAT3	2
neuron	BP	GO:0070741	response to interleukin-6	2/25	46/18800	0.00169522234030516	0.0153320773475845	0.00790042	NFKB1/STAT3	2
neuron	BP	GO:0006163	purine nucleotide metabolic process	4/25	394/18800	0.00169563137138595	0.0153320773475845	0.00790042	ACACA/STAT3/PPARA/INSR	4
neuron	BP	GO:0019693	ribose phosphate metabolic process	4/25	394/18800	0.00169563137138595	0.0153320773475845	0.00790042	ACACA/STAT3/PPARA/INSR	4
neuron	BP	GO:0050727	regulation of inflammatory response	4/25	394/18800	0.00169563137138595	0.0153320773475845	0.00790042	GSTP1/NFKB1/PPARG/PPARA	4
neuron	BP	GO:0048017	inositol lipid-mediated signaling	3/25	181/18800	0.00172720389767783	0.0154282096298198	0.00794996	PIK3CA/IGF1R/INSR	3
neuron	BP	GO:0006839	mitochondrial transport	3/25	182/18800	0.0017546147939322	0.0154282096298198	0.00794996	SREBF1/HSP90AA1/BCL2L1	3
neuron	BP	GO:0045646	regulation of erythrocyte differentiation	2/25	47/18800	0.00176912531843685	0.0154282096298198	0.00794996	CDK6/STAT3	2
neuron	BP	GO:0051972	regulation of telomerase activity	2/25	47/18800	0.00176912531843685	0.0154282096298198	0.00794996	MAPK1/HSP90AA1	2
neuron	BP	GO:0070849	response to epidermal growth factor	2/25	47/18800	0.00176912531843685	0.0154282096298198	0.00794996	MAPK1/EEF1A1	2
neuron	BP	GO:0101023	vascular endothelial cell proliferation	2/25	47/18800	0.00176912531843685	0.0154282096298198	0.00794996	PPARG/STAT3	2
neuron	BP	GO:1905562	regulation of vascular endothelial cell proliferation	2/25	47/18800	0.00176912531843685	0.0154282096298198	0.00794996	PPARG/STAT3	2
neuron	BP	GO:0043405	regulation of MAP kinase activity	3/25	183/18800	0.0017822975056651	0.0154645813875386	0.0079687	GSTP1/PPARG/INSR	3
neuron	BP	GO:0009749	response to glucose	3/25	189/18800	0.00195415735896825	0.0168705645362184	0.00869318	SREBF1/PIK3CA/IGF1R	3
neuron	BP	GO:0009410	response to xenobiotic stimulus	4/25	411/18800	0.0019786771139373	0.0169558087627176	0.00873711	GSTP1/SREBF1/KCNH2/MAOB	4
neuron	BP	GO:0009755	hormone-mediated signaling pathway	3/25	190/18800	0.00198377040821085	0.0169558087627176	0.00873711	PPARG/PPARA/AR	3
neuron	BP	GO:0072521	purine-containing compound metabolic process	4/25	416/18800	0.0020678176860131	0.0173454511421363	0.00893789	ACACA/STAT3/PPARA/INSR	4
neuron	BP	GO:0009746	response to hexose	3/25	193/18800	0.00207429130081218	0.0173454511421363	0.00893789	SREBF1/PIK3CA/IGF1R	3
neuron	BP	GO:0010823	negative regulation of mitochondrion organization	2/25	51/18800	0.00207983872833532	0.0173454511421363	0.00893789	PPARG/BCL2L1	2
neuron	BP	GO:0045668	negative regulation of osteoblast differentiation	2/25	51/18800	0.00207983872833532	0.0173454511421363	0.00893789	PPARG/CDK6	2
neuron	BP	GO:0045912	negative regulation of carbohydrate metabolic process	2/25	51/18800	0.00207983872833532	0.0173454511421363	0.00893789	STAT3/PPARA	2
neuron	BP	GO:1902930	regulation of alcohol biosynthetic process	2/25	52/18800	0.00216127335667527	0.0178158637768099	0.00918028	NFKB1/SREBF1	2
neuron	BP	GO:1904036	negative regulation of epithelial cell apoptotic process	2/25	52/18800	0.00216127335667527	0.0178158637768099	0.00918028	PPARA/IGF1R	2
neuron	BP	GO:0042594	response to starvation	3/25	196/18800	0.00216735479007757	0.0178158637768099	0.00918028	MAPK1/SREBF1/PPARA	3
neuron	BP	GO:0032872	regulation of stress-activated MAPK cascade	3/25	198/18800	0.00223082221558929	0.0182502503161066	0.00940412	GSTP1/MAPK1/IGF1R	3
neuron	BP	GO:0007179	transforming growth factor beta receptor signaling pathway	3/25	200/18800	0.00229543839446813	0.0185176504430252	0.00954191	PPARG/STAT3/PPARA	3
neuron	BP	GO:0034284	response to monosaccharide	3/25	200/18800	0.00229543839446813	0.0185176504430252	0.00954191	SREBF1/PIK3CA/IGF1R	3
neuron	BP	GO:0032102	negative regulation of response to external stimulus	4/25	429/18800	0.00231260230447235	0.0185176504430252	0.00954191	GSTP1/NFKB1/PPARG/PPARA	4
neuron	BP	GO:0006006	glucose metabolic process	3/25	201/18800	0.00232817956675986	0.0185176504430252	0.00954191	PPARA/PIK3CA/INSR	3
neuron	BP	GO:0009612	response to mechanical stimulus	3/25	201/18800	0.00232817956675986	0.0185176504430252	0.00954191	NFKB1/PIK3CA/IGF1R	3
neuron	BP	GO:0070302	regulation of stress-activated protein kinase signaling cascade	3/25	201/18800	0.00232817956675986	0.0185176504430252	0.00954191	GSTP1/MAPK1/IGF1R	3
neuron	BP	GO:0048732	gland development	4/25	431/18800	0.00235196600814306	0.018620634110552	0.00959497	MAPK1/PIK3CA/INSR/AR	4
neuron	BP	GO:0071383	cellular response to steroid hormone stimulus	3/25	203/18800	0.00239453263763074	0.0188706746396771	0.00972381	PPARA/IGF1R/AR	3
neuron	BP	GO:0007623	circadian rhythm	3/25	205/18800	0.00246205270443862	0.0193141851425824	0.00995235	SREBF1/PPARG/PPARA	3
neuron	CC	GO:1904813	ficolin-1-rich granule lumen	4/25	124/19594	1.74370878011552e-05	0.00158417090559121	0.000920487	GSTP1/MAPK1/EEF1A1/HSP90AA1	4
neuron	CC	GO:0034774	secretory granule lumen	5/25	322/19594	4.71133127444432e-05	0.00158417090559121	0.000920487	GSTP1/MAPK1/NFKB1/EEF1A1/HSP90AA1	5
neuron	CC	GO:0060205	cytoplasmic vesicle lumen	5/25	325/19594	4.92369631680728e-05	0.00158417090559121	0.000920487	GSTP1/MAPK1/NFKB1/EEF1A1/HSP90AA1	5
neuron	CC	GO:0031983	vesicle lumen	5/25	327/19594	5.06934689789188e-05	0.00158417090559121	0.000920487	GSTP1/MAPK1/NFKB1/EEF1A1/HSP90AA1	5
neuron	CC	GO:0101002	ficolin-1-rich granule	4/25	185/19594	8.33230146670236e-05	0.00208307536667559	0.00121038	GSTP1/MAPK1/EEF1A1/HSP90AA1	4
neuron	CC	GO:0005901	caveola	3/25	82/19594	0.000152027975531268	0.00281343285628571	0.00163475	MAPK1/IGF1R/INSR	3
neuron	CC	GO:0031252	cell leading edge	5/25	416/19594	0.000157552239952	0.00281343285628571	0.00163475	GABRA1/CDK6/EEF1A1/PIK3CA/INSR	5
neuron	CC	GO:0044853	plasma membrane raft	3/25	113/19594	0.000391586481352598	0.00515310350523926	0.00299422	MAPK1/IGF1R/INSR	3
neuron	CC	GO:1902911	protein kinase complex	3/25	115/19594	0.000412248280419141	0.00515310350523926	0.00299422	CDK6/IGF1R/INSR	3
neuron	CC	GO:0032590	dendrite membrane	2/25	41/19594	0.00124306881936519	0.0141257820382408	0.00820782	GABRA1/INSR	2
neuron	CC	GO:0031256	leading edge membrane	3/25	175/19594	0.00139382235551734	0.0145189828699723	0.00843629	GABRA1/EEF1A1/INSR	3
neuron	MF	GO:0004879	nuclear receptor activity	5/25	52/18410	7.51253564247637e-09	7.21203421677731e-07	3.28179e-07	SREBF1/PPARG/STAT3/PPARA/AR	5
neuron	MF	GO:0098531	ligand-activated transcription factor activity	5/25	52/18410	7.51253564247637e-09	7.21203421677731e-07	3.28179e-07	SREBF1/PPARG/STAT3/PPARA/AR	5
neuron	MF	GO:0043560	insulin receptor substrate binding	3/25	10/18410	2.63781022474825e-07	1.68819854383888e-05	7.68204e-06	PIK3CA/IGF1R/INSR	3
neuron	MF	GO:0042562	hormone binding	4/25	87/18410	5.4551575053313e-06	0.000261847560255902	0.000119152	ECE1/IGF1R/INSR/AR	4
neuron	MF	GO:0001221	transcription coregulator binding	4/25	108/18410	1.2884296891927e-05	0.000494757000649995	0.000225136	SREBF1/PPARG/PPARA/AR	4
neuron	MF	GO:0004712	protein serine/threonine/tyrosine kinase activity	6/25	446/18410	2.34077535256986e-05	0.000749048112822355	0.00034085	PRKCB/MAPK1/CDK6/PIK3CA/IGF1R/INSR	6
neuron	MF	GO:0140297	DNA-binding transcription factor binding	6/25	470/18410	3.14299860751544e-05	0.000862079618061378	0.000392284	PRKCB/RUNX1T1/PPARG/STAT3/PPARA/AR	6
neuron	MF	GO:0017046	peptide hormone binding	3/25	52/18410	4.67847297837542e-05	0.0011228335148101	0.000510938	ECE1/IGF1R/INSR	3
neuron	MF	GO:0042277	peptide binding	5/25	322/18410	6.32291495853989e-05	0.00134888852448851	0.000613803	ECE1/PPARG/IGF1R/INSR/GRIA2	5
neuron	MF	GO:0061629	RNA polymerase II-specific DNA-binding transcription factor binding	5/25	348/18410	9.12547316339113e-05	0.0017520908473711	0.000797278	PRKCB/PPARG/STAT3/PPARA/AR	5
neuron	MF	GO:0008353	RNA polymerase II CTD heptapeptide repeat kinase activity	2/25	12/18410	0.000115875915956007	0.00202256144214122	0.000920354	MAPK1/CDK6	2
neuron	MF	GO:0031994	insulin-like growth factor I binding	2/25	13/18410	0.000136830266274751	0.00218928426039601	0.00099622	IGF1R/INSR	2
neuron	MF	GO:0033218	amide binding	5/25	402/18410	0.000179382805931608	0.00264934605683606	0.00120557	ECE1/PPARG/IGF1R/INSR/GRIA2	5
neuron	MF	GO:0016500	protein-hormone receptor activity	2/25	20/18410	0.000331367637956912	0.00426449715027381	0.00194053	IGF1R/INSR	2
neuron	MF	GO:0001216	DNA-binding transcription activator activity	5/25	466/18410	0.000355374762522818	0.00426449715027381	0.00194053	NFKB1/SREBF1/STAT3/PPARA/AR	5
neuron	MF	GO:0030594	neurotransmitter receptor activity	3/25	111/18410	0.000445404490579376	0.00503045071713177	0.00228908	GABRA1/CHRM2/GRIA2	3
neuron	MF	GO:0005520	insulin-like growth factor binding	2/25	29/18410	0.000702797085342216	0.0071019494939845	0.0032317	IGF1R/INSR	2
neuron	MF	GO:0043548	phosphatidylinositol 3-kinase binding	2/25	29/18410	0.000702797085342216	0.0071019494939845	0.0032317	IGF1R/INSR	2
neuron	MF	GO:0015276	ligand-gated ion channel activity	3/25	145/18410	0.000969317307494741	0.00886232966852335	0.00403275	GABRA1/KCNH2/GRIA2	3
neuron	MF	GO:0022834	ligand-gated channel activity	3/25	145/18410	0.000969317307494741	0.00886232966852335	0.00403275	GABRA1/KCNH2/GRIA2	3
neuron	MF	GO:0042805	actinin binding	2/25	36/18410	0.00108421645257668	0.00946225267703285	0.00430574	NFKB1/PPARG	2
neuron	MF	GO:0106310	protein serine kinase activity	4/25	360/18410	0.00131413133721539	0.010703250883021	0.00487045	PRKCB/MAPK1/CDK6/PIK3CA	4
neuron	MF	GO:0001223	transcription coactivator binding	2/25	40/18410	0.00133790636037762	0.010703250883021	0.00487045	PPARA/AR	2
neuron	MF	GO:0005504	fatty acid binding	2/25	49/18410	0.00200211985120423	0.0153762804572485	0.00699688	GSTP1/PPARG	2
neuron	MF	GO:0019902	phosphatase binding	3/25	193/18410	0.0022011652538596	0.0162547587977325	0.00739663	MAPK1/STAT3/PPARA	3
neuron	MF	GO:0004674	protein serine/threonine kinase activity	4/25	430/18410	0.00251580108295174	0.0178901410343235	0.0081408	PRKCB/MAPK1/CDK6/PIK3CA	4
neuron	MF	GO:0004714	transmembrane receptor protein tyrosine kinase activity	2/25	60/18410	0.00298599023714439	0.0191103375177241	0.00869604	IGF1R/INSR	2
neuron	MF	GO:0022824	transmitter-gated ion channel activity	2/25	60/18410	0.00298599023714439	0.0191103375177241	0.00869604	GABRA1/GRIA2	2
neuron	MF	GO:0022835	transmitter-gated channel activity	2/25	60/18410	0.00298599023714439	0.0191103375177241	0.00869604	GABRA1/GRIA2	2
neuron	MF	GO:0098960	postsynaptic neurotransmitter receptor activity	2/25	64/18410	0.00338971807453834	0.0209943829132697	0.00955337	GABRA1/CHRM2	2
astrocyte	BP	GO:0042026	protein refolding	3/14	24/18800	6.59256838299942e-07	0.00041869	0.00017936	HSPB1/HSPA5/HSP90AA1	3
astrocyte	BP	GO:1901652	response to peptide	6/14	491/18800	7.7362498519579e-07	0.00041869	0.00017936	GJA1/PIK3CA/RB1/STAT3/NFKBIA/APP	6
astrocyte	BP	GO:0033138	positive regulation of peptidyl-serine phosphorylation	4/14	107/18800	9.50133562263413e-07	0.00041869	0.00017936	EGFR/PIK3CA/APP/HSP90AA1	4
astrocyte	BP	GO:0018105	peptidyl-serine phosphorylation	5/14	315/18800	2.2624897892527e-06	0.00070407	0.00030161	EGFR/IKBKB/PIK3CA/APP/HSP90AA1	5
astrocyte	BP	GO:0033135	regulation of peptidyl-serine phosphorylation	4/14	144/18800	3.11326216423055e-06	0.00070407	0.00030161	EGFR/PIK3CA/APP/HSP90AA1	4
astrocyte	BP	GO:0018209	peptidyl-serine modification	5/14	338/18800	3.19546182697668e-06	0.00070407	0.00030161	EGFR/IKBKB/PIK3CA/APP/HSP90AA1	5
astrocyte	BP	GO:1901653	cellular response to peptide	5/14	361/18800	4.40837062024595e-06	0.00083255	0.00035665	GJA1/PIK3CA/RB1/STAT3/APP	5
astrocyte	BP	GO:0072594	establishment of protein localization to organelle	5/14	431/18800	1.04424223197858e-05	0.00146901	0.00062929	NPEPPS/HSPA5/STAT3/NFKBIA/HSP90AA1	5
astrocyte	BP	GO:0032103	positive regulation of response to external stimulus	5/14	442/18800	1.17989634021147e-05	0.00146901	0.00062929	HSPB1/IKBKB/NFKBIA/APP/HSP90AA1	5
astrocyte	BP	GO:0032731	positive regulation of interleukin-1 beta production	3/14	62/18800	1.21148224028968e-05	0.00146901	0.00062929	HSPB1/STAT3/APP	3
astrocyte	BP	GO:0051090	regulation of DNA-binding transcription factor activity	5/14	452/18800	1.31487329222238e-05	0.00146901	0.00062929	IKBKB/RB1/STAT3/NFKBIA/APP	5
astrocyte	BP	GO:0040014	regulation of multicellular organism growth	3/14	64/18800	1.33344431736884e-05	0.00146901	0.00062929	PIK3CA/STAT3/APP	3
astrocyte	BP	GO:0016049	cell growth	5/14	484/18800	1.82988197503433e-05	0.00186085	0.00079715	GJA1/EGFR/RB1/APP/HSP90AA1	5
astrocyte	BP	GO:0032732	positive regulation of interleukin-1 production	3/14	73/18800	1.98270924688181e-05	0.00187224	0.00080203	HSPB1/STAT3/APP	3
astrocyte	BP	GO:0051402	neuron apoptotic process	4/14	241/18800	2.38336134881867e-05	0.00210054	0.00089982	PIK3CA/HSPA5/RB1/APP	4
astrocyte	BP	GO:0071287	cellular response to manganese ion	2/14	13/18800	3.99797443418149e-05	0.00330333	0.00141507	HSPA5/APP	2
astrocyte	BP	GO:1902947	regulation of tau-protein kinase activity	2/14	14/18800	4.66231877763406e-05	0.00336709	0.00144239	RB1/HSP90AA1	2
astrocyte	BP	GO:0007249	I-kappaB kinase/NF-kappaB signaling	4/14	288/18800	4.78324750418626e-05	0.00336709	0.00144239	HSPB1/GJA1/IKBKB/NFKBIA	4
astrocyte	BP	GO:0031349	positive regulation of defense response	4/14	289/18800	4.84830092420794e-05	0.00336709	0.00144239	IKBKB/NFKBIA/APP/HSP90AA1	4
astrocyte	BP	GO:1901992	positive regulation of mitotic cell cycle phase transition	3/14	100/18800	5.09393463443209e-05	0.00336709	0.00144239	EGFR/RB1/APP	3
astrocyte	BP	GO:0032760	positive regulation of tumor necrosis factor production	3/14	103/18800	5.56388540766184e-05	0.00344179	0.00147439	HSPB1/STAT3/APP	3
astrocyte	BP	GO:0061684	chaperone-mediated autophagy	2/14	16/18800	6.14288167004008e-05	0.00344179	0.00147439	EEF1A1/HSP90AA1	2
astrocyte	BP	GO:1903557	positive regulation of tumor necrosis factor superfamily cytokine production	3/14	107/18800	6.2335396550311e-05	0.00344179	0.00147439	HSPB1/STAT3/APP	3
astrocyte	BP	GO:0032611	interleukin-1 beta production	3/14	110/18800	6.76902286702855e-05	0.00344179	0.00147439	HSPB1/STAT3/APP	3
astrocyte	BP	GO:0032651	regulation of interleukin-1 beta production	3/14	110/18800	6.76902286702855e-05	0.00344179	0.00147439	HSPB1/STAT3/APP	3
astrocyte	BP	GO:1901222	regulation of NIK/NF-kappaB signaling	3/14	110/18800	6.76902286702855e-05	0.00344179	0.00147439	EGFR/NFKBIA/APP	3
astrocyte	BP	GO:0051897	positive regulation of protein kinase B signaling	3/14	119/18800	8.55420229440076e-05	0.00411092	0.00176103	EGFR/PIK3CA/HSP90AA1	3
astrocyte	BP	GO:0010506	regulation of autophagy	4/14	336/18800	8.70694969809719e-05	0.00411092	0.00176103	HSPB1/PIK3CA/STAT3/EEF1A1	4
astrocyte	BP	GO:1901989	positive regulation of cell cycle phase transition	3/14	123/18800	9.43737520078078e-05	0.00430214	0.00184294	EGFR/RB1/APP	3
astrocyte	BP	GO:0070997	neuron death	4/14	353/18800	0.000105393210063041	0.00435488	0.00186553	PIK3CA/HSPA5/RB1/APP	4
astrocyte	BP	GO:0045931	positive regulation of mitotic cell cycle	3/14	128/18800	0.000106225887830578	0.00435488	0.00186553	EGFR/RB1/APP	3
astrocyte	BP	GO:0032612	interleukin-1 production	3/14	129/18800	0.000108707265791514	0.00435488	0.00186553	HSPB1/STAT3/APP	3
astrocyte	BP	GO:0032652	regulation of interleukin-1 production	3/14	129/18800	0.000108707265791514	0.00435488	0.00186553	HSPB1/STAT3/APP	3
astrocyte	BP	GO:0010042	response to manganese ion	2/14	22/18800	0.000117948911704759	0.00458613	0.0019646	HSPA5/APP	2
astrocyte	BP	GO:0043467	regulation of generation of precursor metabolites and energy	3/14	134/18800	0.000121683220319892	0.00459615	0.00196889	PIK3CA/STAT3/APP	3
astrocyte	BP	GO:0006986	response to unfolded protein	3/14	139/18800	0.000135631283197437	0.00479614	0.00205456	HSPB1/HSPA5/HSP90AA1	3
astrocyte	BP	GO:0035994	response to muscle stretch	2/14	24/18800	0.000140806081223919	0.00479614	0.00205456	PIK3CA/NFKBIA	2
astrocyte	BP	GO:2000637	positive regulation of miRNA-mediated gene silencing	2/14	24/18800	0.000140806081223919	0.00479614	0.00205456	EGFR/STAT3	2
astrocyte	BP	GO:0038061	NIK/NF-kappaB signaling	3/14	141/18800	0.000141489882415192	0.00479614	0.00205456	EGFR/NFKBIA/APP	3
astrocyte	BP	GO:0035264	multicellular organism growth	3/14	143/18800	0.000147511181763842	0.00480632	0.00205892	PIK3CA/STAT3/APP	3
astrocyte	BP	GO:0060148	positive regulation of post-transcriptional gene silencing	2/14	25/18800	0.00015298497293013	0.00480632	0.00205892	EGFR/STAT3	2
astrocyte	BP	GO:1900370	positive regulation of post-transcriptional gene silencing by RNA	2/14	25/18800	0.00015298497293013	0.00480632	0.00205892	EGFR/STAT3	2
astrocyte	BP	GO:0030099	myeloid cell differentiation	4/14	391/18800	0.00015633252130879	0.00480632	0.00205892	RB1/STAT3/NFKBIA/APP	4
astrocyte	BP	GO:0051092	positive regulation of NF-kappaB transcription factor activity	3/14	154/18800	0.00018362680416269	0.00551715	0.00236343	IKBKB/STAT3/APP	3
astrocyte	BP	GO:0035966	response to topologically incorrect protein	3/14	160/18800	0.000205545677368152	0.00603848	0.00258675	HSPB1/HSPA5/HSP90AA1	3
astrocyte	BP	GO:0071466	cellular response to xenobiotic stimulus	3/14	168/18800	0.000237322885098369	0.00682045	0.00292173	HSPA5/EPHX1/RB1	3
astrocyte	BP	GO:0045936	negative regulation of phosphate metabolic process	4/14	440/18800	0.000245890842221007	0.00683129	0.00292637	HSPB1/IKBKB/RB1/STAT3	4
astrocyte	BP	GO:0010563	negative regulation of phosphorus metabolic process	4/14	441/18800	0.000248034738099055	0.00683129	0.00292637	HSPB1/IKBKB/RB1/STAT3	4
astrocyte	BP	GO:0001659	temperature homeostasis	3/14	177/18800	0.000276700636434783	0.00746527	0.00319796	GJA1/RB1/STAT3	3
astrocyte	BP	GO:0009266	response to temperature stimulus	3/14	180/18800	0.000290708995254841	0.00747099	0.00320041	HSPB1/NFKBIA/HSP90AA1	3
astrocyte	BP	GO:0007219	Notch signaling pathway	3/14	182/18800	0.000300298543383632	0.00747099	0.00320041	STAT3/NFKBIA/APP	3
astrocyte	BP	GO:0032640	tumor necrosis factor production	3/14	182/18800	0.000300298543383632	0.00747099	0.00320041	HSPB1/STAT3/APP	3
astrocyte	BP	GO:0032680	regulation of tumor necrosis factor production	3/14	182/18800	0.000300298543383632	0.00747099	0.00320041	HSPB1/STAT3/APP	3
astrocyte	BP	GO:0048469	cell maturation	3/14	183/18800	0.000305169214420707	0.00747099	0.00320041	GJA1/RB1/APP	3
astrocyte	BP	GO:0051896	regulation of protein kinase B signaling	3/14	187/18800	0.000325163328592996	0.00750586	0.00321535	EGFR/PIK3CA/HSP90AA1	3
astrocyte	BP	GO:0071706	tumor necrosis factor superfamily cytokine production	3/14	187/18800	0.000325163328592996	0.00750586	0.00321535	HSPB1/STAT3/APP	3
astrocyte	BP	GO:1903555	regulation of tumor necrosis factor superfamily cytokine production	3/14	187/18800	0.000325163328592996	0.00750586	0.00321535	HSPB1/STAT3/APP	3
astrocyte	BP	GO:0001819	positive regulation of cytokine production	4/14	475/18800	0.000329303961248136	0.00750586	0.00321535	HSPB1/STAT3/APP/HSP90AA1	4
astrocyte	BP	GO:0071248	cellular response to metal ion	3/14	191/18800	0.000345986880244431	0.00775245	0.00332098	EGFR/HSPA5/APP	3
astrocyte	BP	GO:0097009	energy homeostasis	2/14	40/18800	0.000395230332282093	0.00870824	0.00373042	PIK3CA/STAT3	2
astrocyte	BP	GO:0060964	regulation of miRNA-mediated gene silencing	2/14	42/18800	0.000435902418613609	0.00919107	0.00393725	EGFR/STAT3	2
astrocyte	BP	GO:0045637	regulation of myeloid cell differentiation	3/14	208/18800	0.000444081360210792	0.00919107	0.00393725	RB1/STAT3/NFKBIA	3
astrocyte	BP	GO:0017038	protein import	3/14	210/18800	0.000456676069861901	0.00919107	0.00393725	STAT3/NFKBIA/HSP90AA1	3
astrocyte	BP	GO:0071364	cellular response to epidermal growth factor stimulus	2/14	43/18800	0.000456971497277529	0.00919107	0.00393725	EGFR/EEF1A1	2
astrocyte	BP	GO:0006457	protein folding	3/14	212/18800	0.000469498961592265	0.00919107	0.00393725	HSPB1/HSPA5/HSP90AA1	3
astrocyte	BP	GO:0060147	regulation of post-transcriptional gene silencing	2/14	44/18800	0.000478528420560612	0.00919107	0.00393725	EGFR/STAT3	2
astrocyte	BP	GO:1900368	regulation of post-transcriptional gene silencing by RNA	2/14	44/18800	0.000478528420560612	0.00919107	0.00393725	EGFR/STAT3	2
astrocyte	BP	GO:0043491	protein kinase B signaling	3/14	216/18800	0.000495836340721777	0.00919107	0.00393725	EGFR/PIK3CA/HSP90AA1	3
astrocyte	BP	GO:0006110	regulation of glycolytic process	2/14	45/18800	0.000500572554878928	0.00919107	0.00393725	STAT3/APP	2
astrocyte	BP	GO:0042551	neuron maturation	2/14	45/18800	0.000500572554878928	0.00919107	0.00393725	RB1/APP	2
astrocyte	BP	GO:1904646	cellular response to amyloid-beta	2/14	45/18800	0.000500572554878928	0.00919107	0.00393725	GJA1/APP	2
astrocyte	BP	GO:1990090	cellular response to nerve growth factor stimulus	2/14	45/18800	0.000500572554878928	0.00919107	0.00393725	HSPA5/APP	2
astrocyte	BP	GO:0046677	response to antibiotic	2/14	46/18800	0.000523103267208695	0.00934342	0.00400252	HSPA5/HSP90AA1	2
astrocyte	BP	GO:0060966	regulation of gene silencing by RNA	2/14	46/18800	0.000523103267208695	0.00934342	0.00400252	EGFR/STAT3	2
astrocyte	BP	GO:0071241	cellular response to inorganic substance	3/14	221/18800	0.000530072858096211	0.00934342	0.00400252	EGFR/HSPA5/APP	3
astrocyte	BP	GO:0070849	response to epidermal growth factor	2/14	47/18800	0.000546119925085873	0.00937624	0.00401658	EGFR/EEF1A1	2
astrocyte	BP	GO:1990089	response to nerve growth factor	2/14	47/18800	0.000546119925085873	0.00937624	0.00401658	HSPA5/APP	2
astrocyte	BP	GO:0030225	macrophage differentiation	2/14	49/18800	0.00059360855042264	0.0100609	0.00430987	RB1/APP	2
astrocyte	BP	GO:0038084	vascular endothelial growth factor signaling pathway	2/14	50/18800	0.000618079255749293	0.010343	0.00443073	HSPB1/PIK3CA	2
astrocyte	BP	GO:0009409	response to cold	2/14	51/18800	0.000643033382356684	0.0106261	0.004552	NFKBIA/HSP90AA1	2
astrocyte	BP	GO:0035196	production of miRNAs involved in gene silencing by miRNA	2/14	52/18800	0.000668470300573526	0.0109101	0.00467365	EGFR/STAT3	2
astrocyte	BP	GO:0051403	stress-activated MAPK cascade	3/14	245/18800	0.000715566002979686	0.0113612	0.00486688	EGFR/IKBKB/APP	3
astrocyte	BP	GO:0071320	cellular response to cAMP	2/14	54/18800	0.000720789995936779	0.0113612	0.00486688	HSPA5/APP	2
astrocyte	BP	GO:0071695	anatomical structure maturation	3/14	246/18800	0.000724081240702559	0.0113612	0.00486688	GJA1/RB1/APP	3
astrocyte	BP	GO:0090068	positive regulation of cell cycle process	3/14	247/18800	0.000732661185697284	0.0113612	0.00486688	EGFR/RB1/APP	3
astrocyte	BP	GO:0043470	regulation of carbohydrate catabolic process	2/14	55/18800	0.000747671516525799	0.0113612	0.00486688	STAT3/APP	2
astrocyte	BP	GO:1904645	response to amyloid-beta	2/14	55/18800	0.000747671516525799	0.0113612	0.00486688	GJA1/APP	2
astrocyte	BP	GO:0070918	primary sncRNA processing	2/14	56/18800	0.00077503331560869	0.0115347	0.00494119	EGFR/STAT3	2
astrocyte	BP	GO:0031098	stress-activated protein kinase signaling cascade	3/14	252/18800	0.000776538663710827	0.0115347	0.00494119	EGFR/IKBKB/APP	3
astrocyte	BP	GO:0043122	regulation of I-kappaB kinase/NF-kappaB signaling	3/14	254/18800	0.00079454973131456	0.0116711	0.00499962	HSPB1/GJA1/IKBKB	3
astrocyte	BP	GO:0090150	establishment of protein localization to membrane	3/14	259/18800	0.000840741710284463	0.0122139	0.00523215	EGFR/HSPA5/HSP90AA1	3
astrocyte	BP	GO:0002218	activation of innate immune response	2/14	59/18800	0.000859994117712208	0.0123577	0.00529379	IKBKB/HSP90AA1	2
astrocyte	BP	GO:0051205	protein insertion into membrane	2/14	60/18800	0.000889270767437462	0.0126349	0.00541251	EGFR/HSP90AA1	2
astrocyte	BP	GO:0051091	positive regulation of DNA-binding transcription factor activity	3/14	265/18800	0.000898396203191568	0.0126349	0.00541251	IKBKB/STAT3/APP	3
astrocyte	BP	GO:0001894	tissue homeostasis	3/14	272/18800	0.000968780301000511	0.0134813	0.00577511	HSPB1/GJA1/RB1	3
astrocyte	BP	GO:1901224	positive regulation of NIK/NF-kappaB signaling	2/14	67/18800	0.00110753259258941	0.0152517	0.00653347	EGFR/APP	2
astrocyte	BP	GO:0061077	chaperone-mediated protein folding	2/14	70/18800	0.00120817769611868	0.0163575	0.0070072	HSPB1/HSPA5	2
astrocyte	BP	GO:0071375	cellular response to peptide hormone stimulus	3/14	294/18800	0.00121258469936364	0.0163575	0.0070072	PIK3CA/RB1/STAT3	3
astrocyte	BP	GO:0021700	developmental maturation	3/14	296/18800	0.00123649579537017	0.0164281	0.00703743	GJA1/RB1/APP	3
astrocyte	BP	GO:0031507	heterochromatin assembly	2/14	71/18800	0.00124266875627848	0.0164281	0.00703743	PIK3CA/RB1	2
astrocyte	BP	GO:0035924	cellular response to vascular endothelial growth factor stimulus	2/14	74/18800	0.00134896135331308	0.0176567	0.00756374	HSPB1/PIK3CA	2
astrocyte	BP	GO:0086003	cardiac muscle cell contraction	2/14	75/18800	0.00138532996617284	0.017955	0.00769151	GJA1/PIK3CA	2
astrocyte	BP	GO:0008088	axo-dendritic transport	2/14	78/18800	0.00149724041663818	0.0188747	0.00808551	HSPB1/APP	2
astrocyte	BP	GO:0006605	protein targeting	3/14	317/18800	0.00150580817347872	0.0188747	0.00808551	NPEPPS/HSPA5/HSP90AA1	3
astrocyte	BP	GO:0060249	anatomical structure homeostasis	3/14	319/18800	0.00153322898172785	0.0188747	0.00808551	HSPB1/GJA1/RB1	3
astrocyte	BP	GO:0048708	astrocyte differentiation	2/14	79/18800	0.00153547671972616	0.0188747	0.00808551	STAT3/APP	2
astrocyte	BP	GO:0070828	heterochromatin organization	2/14	79/18800	0.00153547671972616	0.0188747	0.00808551	PIK3CA/RB1	2
astrocyte	BP	GO:1901990	regulation of mitotic cell cycle phase transition	3/14	321/18800	0.00156096384012009	0.0188747	0.00808551	EGFR/RB1/APP	3
astrocyte	BP	GO:0071214	cellular response to abiotic stimulus	3/14	323/18800	0.00158901413652866	0.0188747	0.00808551	GJA1/PIK3CA/HSPA5	3
astrocyte	BP	GO:0104004	cellular response to environmental stimulus	3/14	323/18800	0.00158901413652866	0.0188747	0.00808551	GJA1/PIK3CA/HSPA5	3
astrocyte	BP	GO:0009895	negative regulation of catabolic process	3/14	324/18800	0.00160315800592944	0.0188747	0.00808551	EGFR/PIK3CA/STAT3	3
astrocyte	BP	GO:0006096	glycolytic process	2/14	81/18800	0.00161334486919181	0.0188747	0.00808551	STAT3/APP	2
astrocyte	BP	GO:0006757	ATP generation from ADP	2/14	82/18800	0.0016529754887784	0.01909	0.00817775	STAT3/APP	2
astrocyte	BP	GO:0045787	positive regulation of cell cycle	3/14	329/18800	0.00167507143559976	0.01909	0.00817775	EGFR/RB1/APP	3
astrocyte	BP	GO:0048638	regulation of developmental growth	3/14	329/18800	0.00167507143559976	0.01909	0.00817775	PIK3CA/STAT3/APP	3
astrocyte	BP	GO:0062197	cellular response to chemical stress	3/14	332/18800	0.00171918090334719	0.0194253	0.00832136	HSPB1/EGFR/PIK3CA	3
astrocyte	BP	GO:0010507	negative regulation of autophagy	2/14	85/18800	0.00177464617766278	0.019715	0.00844546	PIK3CA/STAT3	2
astrocyte	BP	GO:0071229	cellular response to acid chemical	2/14	85/18800	0.00177464617766278	0.019715	0.00844546	EGFR/PIK3CA	2
astrocyte	BP	GO:1900542	regulation of purine nucleotide metabolic process	2/14	86/18800	0.00181612731237487	0.0200077	0.00857085	STAT3/APP	2
astrocyte	BP	GO:0006140	regulation of nucleotide metabolic process	2/14	88/18800	0.0019004722762155	0.0207638	0.00889477	STAT3/APP	2
astrocyte	BP	GO:0051591	response to cAMP	2/14	89/18800	0.00194333488617675	0.0208869	0.00894749	HSPA5/APP	2
astrocyte	BP	GO:1903578	regulation of ATP metabolic process	2/14	89/18800	0.00194333488617675	0.0208869	0.00894749	STAT3/APP	2
astrocyte	BP	GO:0046031	ADP metabolic process	2/14	90/18800	0.00198665676962536	0.0211803	0.00907319	STAT3/APP	2
astrocyte	BP	GO:0010038	response to metal ion	3/14	351/18800	0.00201560117758014	0.021317	0.00913173	EGFR/HSPA5/APP	3
astrocyte	BP	GO:0045185	maintenance of protein location	2/14	93/18800	0.0021193719813369	0.0222366	0.00952567	HSPA5/NFKBIA	2
astrocyte	BP	GO:0048661	positive regulation of smooth muscle cell proliferation	2/14	95/18800	0.00221013402020283	0.0230063	0.00985538	GJA1/PIK3CA	2
astrocyte	CC	GO:0045121	membrane raft	4/14	326/19594	6.60041485116951e-05	0.00300573	0.00161712	GJA1/EGFR/IKBKB/APP	4
astrocyte	CC	GO:0031983	vesicle lumen	4/14	327/19594	6.67940273979422e-05	0.00300573	0.00161712	EGFR/APP/EEF1A1/HSP90AA1	4
astrocyte	CC	GO:0098857	membrane microdomain	4/14	327/19594	6.67940273979422e-05	0.00300573	0.00161712	GJA1/EGFR/IKBKB/APP	4
astrocyte	CC	GO:0031252	cell leading edge	4/14	416/19594	0.000169317519893364	0.00393194	0.00211543	EGFR/PIK3CA/APP/EEF1A1	4
astrocyte	CC	GO:0005925	focal adhesion	4/14	419/19594	0.000174057228666549	0.00393194	0.00211543	HSPB1/GJA1/EGFR/HSPA5	4
astrocyte	CC	GO:0030055	cell-substrate junction	4/14	428/19594	0.000188855308500724	0.00393194	0.00211543	HSPB1/GJA1/EGFR/HSPA5	4
astrocyte	CC	GO:0005790	smooth endoplasmic reticulum	2/14	30/19594	0.000203878326491075	0.00393194	0.00211543	HSPA5/APP	2
astrocyte	CC	GO:0014704	intercalated disc	2/14	49/19594	0.00054691606728462	0.00922921	0.00496542	GJA1/PIK3CA	2
astrocyte	CC	GO:0044291	cell-cell contact zone	2/14	71/19594	0.00114535604971209	0.0171803	0.00924322	GJA1/PIK3CA	2
astrocyte	CC	GO:0034774	secretory granule lumen	3/14	322/19594	0.00139908150635225	0.0176341	0.00948735	APP/EEF1A1/HSP90AA1	3
astrocyte	CC	GO:0060205	cytoplasmic vesicle lumen	3/14	325/19594	0.00143685239190451	0.0176341	0.00948735	APP/EEF1A1/HSP90AA1	3
astrocyte	CC	GO:0005798	Golgi-associated vesicle	2/14	84/19594	0.00159822511613649	0.01798	0.00967347	GJA1/APP	2
astrocyte	MF	GO:0031625	ubiquitin protein ligase binding	5/14	298/18410	1.9086922652428e-06	0.00014863	8.03e-05	EGFR/HSPA5/RB1/NFKBIA/HSP90AA1	5
astrocyte	MF	GO:0044389	ubiquitin-like protein ligase binding	5/14	317/18410	2.58484358673087e-06	0.00014863	8.03e-05	EGFR/HSPA5/RB1/NFKBIA/HSP90AA1	5
astrocyte	MF	GO:0044183	protein folding chaperone	3/14	43/18410	4.24348415027746e-06	0.00016267	8.78e-05	HSPB1/HSPA5/HSP90AA1	3
astrocyte	MF	GO:0097110	scaffold protein binding	3/14	67/18410	1.62958564376589e-05	0.00046851	0.00025301	GJA1/IKBKB/HSP90AA1	3
astrocyte	MF	GO:0061629	RNA polymerase II-specific DNA-binding transcription factor binding	4/14	348/18410	0.000108122440894007	0.00248682	0.00134299	HSPB1/RB1/STAT3/NFKBIA	4
astrocyte	MF	GO:0097718	disordered domain specific binding	2/14	35/18410	0.000314974872802792	0.0056268	0.00303873	RB1/HSP90AA1	2
astrocyte	MF	GO:0140297	DNA-binding transcription factor binding	4/14	470/18410	0.000342500989836872	0.0056268	0.00303873	HSPB1/RB1/STAT3/NFKBIA	4
microglia	BP	GO:0033002	muscle cell proliferation	8/17	233/18800	1.09005912738005e-11	1.06687607685302e-08	4.14042e-09	PPARD/PTEN/PIK3CA/IGF1R/PPARG/MAPK14/CFLAR/JUN	8
microglia	BP	GO:0035994	response to muscle stretch	5/17	24/18800	1.33109928490708e-11	1.06687607685302e-08	4.14042e-09	PIK3CA/MAPK14/RAF1/NFKBIA/JUN	5
microglia	BP	GO:0031099	regeneration	7/17	188/18800	1.59786358876719e-10	8.53791777597936e-08	3.31346e-08	PPARD/PTEN/IGF1R/GFAP/CFLAR/SPP1/JUN	7
microglia	BP	GO:0032868	response to insulin	7/17	259/18800	1.50181942150532e-09	4.93366975801245e-07	1.9147e-07	PIK3CA/IGF1R/PPARG/MAPK14/PKM/CFLAR/GSK3B	7
microglia	BP	GO:0031102	neuron projection regeneration	5/17	59/18800	1.53888638740251e-09	4.93366975801245e-07	1.9147e-07	PTEN/IGF1R/GFAP/SPP1/JUN	5
microglia	BP	GO:1901652	response to peptide	8/17	491/18800	4.04280456536952e-09	1.08010261971456e-06	4.19175e-07	PIK3CA/IGF1R/PPARG/MAPK14/PKM/CFLAR/NFKBIA/GSK3B	8
microglia	BP	GO:0048660	regulation of smooth muscle cell proliferation	6/17	170/18800	5.70278625837732e-09	1.26921469023038e-06	4.92567e-07	PPARD/PTEN/PIK3CA/IGF1R/PPARG/JUN	6
microglia	BP	GO:0048659	smooth muscle cell proliferation	6/17	173/18800	6.33419683209174e-09	1.26921469023038e-06	4.92567e-07	PPARD/PTEN/PIK3CA/IGF1R/PPARG/JUN	6
microglia	BP	GO:0009612	response to mechanical stimulus	6/17	201/18800	1.55525165748091e-08	2.77007600771322e-06	1.07503e-06	PIK3CA/IGF1R/MAPK14/RAF1/NFKBIA/JUN	6
microglia	BP	GO:0032869	cellular response to insulin stimulus	6/17	205/18800	1.74949868400899e-08	2.80444639046641e-06	1.08837e-06	PIK3CA/IGF1R/PPARG/PKM/CFLAR/GSK3B	6
microglia	BP	GO:0043434	response to peptide hormone	7/17	404/18800	3.24559450932638e-08	4.72971636222745e-06	1.83555e-06	PIK3CA/IGF1R/PPARG/MAPK14/PKM/CFLAR/GSK3B	7
microglia	BP	GO:0042060	wound healing	7/17	429/18800	4.89796187960142e-08	6.2349599740909e-06	2.41971e-06	PPARD/PTEN/PIK3CA/PPARG/MAPK14/RAF1/CFLAR	7
microglia	BP	GO:0010975	regulation of neuron projection development	7/17	431/18800	5.0564241836046e-08	6.2349599740909e-06	2.41971e-06	PTEN/HSPA5/IGF1R/GFAP/CFLAR/SPP1/GSK3B	7
microglia	BP	GO:1902041	regulation of extrinsic apoptotic signaling pathway via death domain receptors	4/17	50/18800	1.02689787745024e-07	1.17579806968053e-05	4.56313e-06	PTEN/RAF1/CFLAR/GSK3B	4
microglia	BP	GO:0031103	axon regeneration	4/17	52/18800	1.20581442751326e-07	1.28861368486917e-05	5.00096e-06	PTEN/IGF1R/SPP1/JUN	4
microglia	BP	GO:0071375	cellular response to peptide hormone stimulus	6/17	294/18800	1.48825113391901e-07	1.48998374888331e-05	5.78245e-06	PIK3CA/IGF1R/PPARG/PKM/CFLAR/GSK3B	6
microglia	BP	GO:0048511	rhythmic process	6/17	297/18800	1.58014496138591e-07	1.48998374888331e-05	5.78245e-06	PTEN/HSPA5/IGF1R/PPARG/TRPM2/GSK3B	6
microglia	BP	GO:0048638	regulation of developmental growth	6/17	329/18800	2.88696272333952e-07	2.57100069195181e-05	9.97775e-06	PPARD/PTEN/PIK3CA/MAPK14/SPP1/GSK3B	6
microglia	BP	GO:0014855	striated muscle cell proliferation	4/17	72/18800	4.53174732134106e-07	3.82336366111038e-05	1.4838e-05	PPARD/PTEN/MAPK14/CFLAR	4
microglia	BP	GO:1901653	cellular response to peptide	6/17	361/18800	4.97764305085956e-07	3.98958090526394e-05	1.54831e-05	PIK3CA/IGF1R/PPARG/PKM/CFLAR/GSK3B	6
microglia	BP	GO:0048678	response to axon injury	4/17	83/18800	8.04538000347041e-07	6.14130673598241e-05	2.38337e-05	PTEN/IGF1R/SPP1/JUN	4
microglia	BP	GO:0008625	extrinsic apoptotic signaling pathway via death domain receptors	4/17	85/18800	8.85499314756106e-07	6.45207000706381e-05	2.50397e-05	PTEN/RAF1/CFLAR/GSK3B	4
microglia	BP	GO:0010888	negative regulation of lipid storage	3/17	22/18800	9.35762843928983e-07	6.52186016877461e-05	2.53106e-05	PPARD/PPARG/NFKBIA	3
microglia	BP	GO:0048608	reproductive structure development	6/17	433/18800	1.43887664636747e-06	9.60393236937886e-05	3.72717e-05	PPARD/PTEN/HSPA5/PPARG/MAPK14/SPP1	6
microglia	BP	GO:0061458	reproductive system development	6/17	436/18800	1.49780604637849e-06	9.60393236937886e-05	3.72717e-05	PPARD/PTEN/HSPA5/PPARG/MAPK14/SPP1	6
microglia	BP	GO:0031667	response to nutrient levels	6/17	446/18800	1.70871627027507e-06	0.000104364232971611	4.05025e-05	PPARD/HSPA5/IGF1R/PPARG/MAPK14/SPP1	6
microglia	BP	GO:0001649	osteoblast differentiation	5/17	241/18800	1.81218459489114e-06	0.000104364232971611	4.05025e-05	PPARG/RUNX2/MAPK14/SPP1/GSK3B	5
microglia	BP	GO:0023061	signal release	6/17	451/18800	1.82295603443861e-06	0.000104364232971611	4.05025e-05	PPARD/PPARG/RAF1/SPP1/TRPM2/GSK3B	6
microglia	BP	GO:0042593	glucose homeostasis	5/17	244/18800	1.92571640313539e-06	0.000104984851260548	4.07434e-05	PPARD/PIK3CA/IGF1R/PPARG/RAF1	5
microglia	BP	GO:0033500	carbohydrate homeostasis	5/17	245/18800	1.96478199489484e-06	0.000104984851260548	4.07434e-05	PPARD/PIK3CA/IGF1R/PPARG/RAF1	5
microglia	BP	GO:0048679	regulation of axon regeneration	3/17	29/18800	2.21164171340121e-06	0.00011301570684825	4.38601e-05	PTEN/IGF1R/SPP1	3
microglia	BP	GO:0071560	cellular response to transforming growth factor beta stimulus	5/17	252/18800	2.25608397950344e-06	0.00011301570684825	4.38601e-05	HSPA5/IGF1R/PPARG/CFLAR/JUN	5
microglia	BP	GO:0071216	cellular response to biotic stimulus	5/17	256/18800	2.43721258276647e-06	0.000117091084574244	4.54417e-05	PPARD/HSPA5/MAPK14/NFKBIA/GSK3B	5
microglia	BP	GO:0071559	response to transforming growth factor beta	5/17	258/18800	2.531974919588e-06	0.000117091084574244	4.54417e-05	HSPA5/IGF1R/PPARG/CFLAR/JUN	5
microglia	BP	GO:0009991	response to extracellular stimulus	6/17	479/18800	2.58450580374983e-06	0.000117091084574244	4.54417e-05	PPARD/HSPA5/IGF1R/PPARG/MAPK14/SPP1	6
microglia	BP	GO:0061448	connective tissue development	5/17	260/18800	2.62961886754385e-06	0.000117091084574244	4.54417e-05	PPARD/PIK3CA/RUNX2/MAPK14/CFLAR	5
microglia	BP	GO:1902042	negative regulation of extrinsic apoptotic signaling pathway via death domain receptors	3/17	31/18800	2.71763126185553e-06	0.000117739538182552	4.56933e-05	RAF1/CFLAR/GSK3B	3
microglia	BP	GO:0070570	regulation of neuron projection regeneration	3/17	32/18800	2.99709017786469e-06	0.000126429883029397	4.90659e-05	PTEN/IGF1R/SPP1	3
microglia	BP	GO:0010817	regulation of hormone levels	6/17	496/18800	3.16194752815371e-06	0.000129964150964882	5.04375e-05	PPARD/IGF1R/PPARG/RAF1/SPP1/TRPM2	6
microglia	BP	GO:0046887	positive regulation of hormone secretion	4/17	122/18800	3.76321819813564e-06	0.000150340859503156	5.83455e-05	PPARD/PPARG/SPP1/TRPM2	4
microglia	BP	GO:0046879	hormone secretion	5/17	281/18800	3.84527463482807e-06	0.000150340859503156	5.83455e-05	PPARD/PPARG/RAF1/SPP1/TRPM2	5
microglia	BP	GO:0009914	hormone transport	5/17	290/18800	4.48510598760431e-06	0.000171181545193565	6.64335e-05	PPARD/PPARG/RAF1/SPP1/TRPM2	5
microglia	BP	GO:0051222	positive regulation of protein transport	5/17	293/18800	4.71602788702821e-06	0.000175809132625726	6.82294e-05	PPARD/PPARG/MAPK14/TRPM2/GSK3B	5
microglia	BP	GO:0071333	cellular response to glucose stimulus	4/17	132/18800	5.14818842693175e-06	0.000187557864735718	7.2789e-05	PPARD/PIK3CA/IGF1R/RAF1	4
microglia	BP	GO:0071331	cellular response to hexose stimulus	4/17	134/18800	5.46507065836531e-06	0.000194677961452435	7.55522e-05	PPARD/PIK3CA/IGF1R/RAF1	4
microglia	BP	GO:0071326	cellular response to monosaccharide stimulus	4/17	136/18800	5.79617089880582e-06	0.000201983955451864	7.83876e-05	PPARD/PIK3CA/IGF1R/RAF1	4
microglia	BP	GO:1904951	positive regulation of establishment of protein localization	5/17	309/18800	6.11047216213111e-06	0.000208406103742472	8.08799e-05	PPARD/PPARG/MAPK14/TRPM2/GSK3B	5
microglia	BP	GO:0033574	response to testosterone	3/17	41/18800	6.40901054235921e-06	0.000209666202028608	8.1369e-05	IGF1R/CFLAR/SPP1	3
microglia	BP	GO:0071548	response to dexamethasone	3/17	41/18800	6.40901054235921e-06	0.000209666202028608	8.1369e-05	PIK3CA/IGF1R/CFLAR	3
microglia	BP	GO:0018105	peptidyl-serine phosphorylation	5/17	315/18800	6.70974202632155e-06	0.000215114329363869	8.34833e-05	PTEN/PIK3CA/MAPK14/RAF1/GSK3B	5
microglia	BP	GO:0071456	cellular response to hypoxia	4/17	143/18800	7.07287962161938e-06	0.000222310314381488	8.6276e-05	PPARD/PTEN/PPARG/CFLAR	4
microglia	BP	GO:0014065	phosphatidylinositol 3-kinase signaling	4/17	144/18800	7.27092485127183e-06	0.000224140241088245	8.69862e-05	PPARD/PTEN/PIK3CA/IGF1R	4
microglia	BP	GO:0071214	cellular response to abiotic stimulus	5/17	323/18800	7.57955699918007e-06	0.000225000553142327	8.732e-05	PTEN/PIK3CA/HSPA5/IGF1R/MAPK14	5
microglia	BP	GO:0104004	cellular response to environmental stimulus	5/17	323/18800	7.57955699918007e-06	0.000225000553142327	8.732e-05	PTEN/PIK3CA/HSPA5/IGF1R/MAPK14	5
microglia	BP	GO:0001890	placenta development	4/17	147/18800	7.88971151180221e-06	0.000225842992025338	8.7647e-05	PPARD/PPARG/MAPK14/SPP1	4
microglia	BP	GO:0071322	cellular response to carbohydrate stimulus	4/17	147/18800	7.88971151180221e-06	0.000225842992025338	8.7647e-05	PPARD/PIK3CA/IGF1R/RAF1	4
microglia	BP	GO:0048545	response to steroid hormone	5/17	330/18800	8.41114579781582e-06	0.00023220696992004	9.01168e-05	PPARD/PIK3CA/IGF1R/CFLAR/SPP1	5
microglia	BP	GO:0051235	maintenance of location	5/17	331/18800	8.53556264969295e-06	0.00023220696992004	9.01168e-05	PPARD/HSPA5/PPARG/TRPM2/NFKBIA	5
microglia	BP	GO:0007584	response to nutrient	4/17	150/18800	8.54660712743751e-06	0.00023220696992004	9.01168e-05	PPARD/IGF1R/PPARG/SPP1	4
microglia	BP	GO:0036294	cellular response to decreased oxygen levels	4/17	151/18800	8.77429539822994e-06	0.000234419925389376	9.09756e-05	PPARD/PTEN/PPARG/CFLAR	4
microglia	BP	GO:2001236	regulation of extrinsic apoptotic signaling pathway	4/17	153/18800	9.24308757561328e-06	0.000239501105830183	9.29475e-05	PTEN/RAF1/CFLAR/GSK3B	4
microglia	BP	GO:0018209	peptidyl-serine modification	5/17	338/18800	9.44747783460999e-06	0.000239501105830183	9.29475e-05	PTEN/PIK3CA/MAPK14/RAF1/GSK3B	5
microglia	BP	GO:0001678	cellular glucose homeostasis	4/17	154/18800	9.48430284262261e-06	0.000239501105830183	9.29475e-05	PPARD/PIK3CA/IGF1R/RAF1	4
microglia	BP	GO:1905953	negative regulation of lipid localization	3/17	47/18800	9.71615523367503e-06	0.000239501105830183	9.29475e-05	PPARD/PPARG/NFKBIA	3
microglia	BP	GO:1905952	regulation of lipid localization	4/17	155/18800	9.73013894929912e-06	0.000239501105830183	9.29475e-05	PPARD/PPARG/SPP1/NFKBIA	4
microglia	BP	GO:0031346	positive regulation of cell projection organization	5/17	341/18800	9.86093136917783e-06	0.000239501105830183	9.29475e-05	PIK3CA/HSPA5/IGF1R/CFLAR/GSK3B	5
microglia	BP	GO:0070997	neuron death	5/17	353/18800	1.16588071766881e-05	0.000278941312003448	0.000108254	PIK3CA/HSPA5/TRPM2/JUN/GSK3B	5
microglia	BP	GO:0010631	epithelial cell migration	5/17	358/18800	1.24796139300007e-05	0.000294188546026339	0.000114171	PPARD/PTEN/PIK3CA/PPARG/JUN	5
microglia	BP	GO:0071453	cellular response to oxygen levels	4/17	166/18800	1.27556449816934e-05	0.000296337665299341	0.000115005	PPARD/PTEN/PPARG/CFLAR	4
microglia	BP	GO:0090132	epithelium migration	5/17	361/18800	1.29934022664732e-05	0.000297548911902237	0.000115475	PPARD/PTEN/PIK3CA/PPARG/JUN	5
microglia	BP	GO:0090130	tissue migration	5/17	366/18800	1.38864064740024e-05	0.000313519853208814	0.000121673	PPARD/PTEN/PIK3CA/PPARG/JUN	5
microglia	BP	GO:0007178	transmembrane receptor protein serine/threonine kinase signaling pathway	5/17	368/18800	1.4256773636854e-05	0.000317411224164957	0.000123184	HSPA5/PPARG/RUNX2/MAPK14/JUN	5
microglia	BP	GO:0010883	regulation of lipid storage	3/17	55/18800	1.56500876581223e-05	0.000343658774191369	0.00013337	PPARD/PPARG/NFKBIA	3
microglia	BP	GO:0048015	phosphatidylinositol-mediated signaling	4/17	177/18800	1.64247551710709e-05	0.000355795709989549	0.00013808	PPARD/PTEN/PIK3CA/IGF1R	4
microglia	BP	GO:0050678	regulation of epithelial cell proliferation	5/17	382/18800	1.7071161075384e-05	0.000364867616051206	0.000141601	PPARD/PTEN/PPARG/CFLAR/JUN	5
microglia	BP	GO:0048017	inositol lipid-mediated signaling	4/17	181/18800	1.79343158778046e-05	0.000378272478317379	0.000146803	PPARD/PTEN/PIK3CA/IGF1R	4
microglia	BP	GO:1902893	regulation of miRNA transcription	3/17	59/18800	1.93494397635606e-05	0.000402820155077762	0.00015633	PPARD/PPARG/JUN	3
microglia	BP	GO:0061614	miRNA transcription	3/17	60/18800	2.03564506461748e-05	0.000418351158792542	0.000162357	PPARD/PPARG/JUN	3
microglia	BP	GO:0009749	response to glucose	4/17	189/18800	2.12571347053164e-05	0.000431331480159774	0.000167395	PPARD/PIK3CA/IGF1R/RAF1	4
microglia	BP	GO:1901654	response to ketone	4/17	190/18800	2.17022162451411e-05	0.000434858158012015	0.000168763	PIK3CA/IGF1R/CFLAR/SPP1	4
microglia	BP	GO:0009746	response to hexose	4/17	193/18800	2.30786721390145e-05	0.000456729770849879	0.000177251	PPARD/PIK3CA/IGF1R/RAF1	4
microglia	BP	GO:0034284	response to monosaccharide	4/17	200/18800	2.6539363019431e-05	0.000516455864792153	0.00020043	PPARD/PIK3CA/IGF1R/RAF1	4
microglia	BP	GO:0001503	ossification	5/17	420/18800	2.69365102254428e-05	0.000516455864792153	0.00020043	PPARG/RUNX2/MAPK14/SPP1/GSK3B	5
microglia	BP	GO:0006006	glucose metabolic process	4/17	201/18800	2.70631894214229e-05	0.000516455864792153	0.00020043	PPARD/PIK3CA/MAPK14/GSK3B	4
microglia	BP	GO:0045600	positive regulation of fat cell differentiation	3/17	67/18800	2.83859694342219e-05	0.000535325988271267	0.000207754	PPARD/PPARG/MAPK14	3
microglia	BP	GO:0032102	negative regulation of response to external stimulus	5/17	429/18800	2.9819019279408e-05	0.000555812650056872	0.000215704	PPARD/PTEN/PPARG/MAPK14/SPP1	5
microglia	BP	GO:0048732	gland development	5/17	431/18800	3.04910496067316e-05	0.000561806350799894	0.00021803	PTEN/PIK3CA/RAF1/CFLAR/JUN	5
microglia	BP	GO:0042698	ovulation cycle	3/17	70/18800	3.23816853489962e-05	0.000589861836527737	0.000228918	HSPA5/IGF1R/TRPM2	3
microglia	BP	GO:0050673	epithelial cell proliferation	5/17	443/18800	3.47752169047231e-05	0.000626344637059226	0.000243077	PPARD/PTEN/PPARG/CFLAR/JUN	5
microglia	BP	GO:1903829	positive regulation of protein localization	5/17	446/18800	3.59161134062756e-05	0.000639705886558441	0.000248262	PPARD/PPARG/MAPK14/TRPM2/GSK3B	5
microglia	BP	GO:0048662	negative regulation of smooth muscle cell proliferation	3/17	73/18800	3.67306715852802e-05	0.000647024907156091	0.000251103	PPARD/PTEN/PPARG	3
microglia	BP	GO:0071241	cellular response to inorganic substance	4/17	221/18800	3.92213203395188e-05	0.000676040607572567	0.000262363	HSPA5/CFLAR/TRPM2/JUN	4
microglia	BP	GO:0097191	extrinsic apoptotic signaling pathway	4/17	221/18800	3.92213203395188e-05	0.000676040607572567	0.000262363	PTEN/RAF1/CFLAR/GSK3B	4
microglia	BP	GO:0010887	negative regulation of cholesterol storage	2/17	11/18800	4.21268876645241e-05	0.000710835799223496	0.000275867	PPARD/PPARG	2
microglia	BP	GO:0071394	cellular response to testosterone stimulus	2/17	11/18800	4.21268876645241e-05	0.000710835799223496	0.000275867	IGF1R/SPP1	2
microglia	BP	GO:0009743	response to carbohydrate	4/17	226/18800	4.27999415785717e-05	0.000714669857817193	0.000277355	PPARD/PIK3CA/IGF1R/RAF1	4
microglia	BP	GO:0046883	regulation of hormone secretion	4/17	231/18800	4.66124629818112e-05	0.000770306991338592	0.000298947	PPARD/PPARG/SPP1/TRPM2	4
microglia	BP	GO:0021766	hippocampus development	3/17	80/18800	4.83311997154621e-05	0.000790560338202916	0.000306807	PTEN/IGF1R/GSK3B	3
microglia	BP	GO:0010660	regulation of muscle cell apoptotic process	3/17	81/18800	5.01620451370748e-05	0.000793679228526839	0.000308017	IGF1R/PPARG/CFLAR	3
microglia	BP	GO:0061564	axon development	5/17	479/18800	5.04935051182814e-05	0.000793679228526839	0.000308017	PTEN/IGF1R/SPP1/JUN/GSK3B	5
microglia	BP	GO:0006983	ER overload response	2/17	12/18800	5.05253792979944e-05	0.000793679228526839	0.000308017	HSPA5/GSK3B	2
microglia	BP	GO:0014842	regulation of skeletal muscle satellite cell proliferation	2/17	12/18800	5.05253792979944e-05	0.000793679228526839	0.000308017	PPARD/CFLAR	2
microglia	BP	GO:0001667	ameboidal-type cell migration	5/17	480/18800	5.09974800613003e-05	0.000793679228526839	0.000308017	PPARD/PTEN/PIK3CA/PPARG/JUN	5
microglia	BP	GO:0033273	response to vitamin	3/17	83/18800	5.39590858316344e-05	0.000831696294116442	0.000322771	PPARD/IGF1R/SPP1	3
microglia	BP	GO:0090066	regulation of anatomical structure size	5/17	487/18800	5.46357608271599e-05	0.000834105948627975	0.000323707	PPARD/PTEN/PIK3CA/SPP1/GSK3B	5
microglia	BP	GO:0019318	hexose metabolic process	4/17	242/18800	5.58697436536793e-05	0.000837849152249714	0.000325159	PPARD/PIK3CA/MAPK14/GSK3B	4
microglia	BP	GO:0071277	cellular response to calcium ion	3/17	84/18800	5.59263002437426e-05	0.000837849152249714	0.000325159	HSPA5/TRPM2/JUN	3
microglia	BP	GO:0043410	positive regulation of MAPK cascade	5/17	491/18800	5.6803456835632e-05	0.000843110567662204	0.000327201	PTEN/IGF1R/RAF1/CFLAR/JUN	5
microglia	BP	GO:0010657	muscle cell apoptotic process	3/17	85/18800	5.79399880826079e-05	0.00084369343279017	0.000327427	IGF1R/PPARG/CFLAR	3
microglia	BP	GO:0051223	regulation of protein transport	5/17	495/18800	5.90373861638004e-05	0.00084369343279017	0.000327427	PPARD/PPARG/MAPK14/TRPM2/GSK3B	5
microglia	BP	GO:0010745	negative regulation of macrophage derived foam cell differentiation	2/17	13/18800	5.96800554027695e-05	0.00084369343279017	0.000327427	PPARG/NFKBIA	2
microglia	BP	GO:0014857	regulation of skeletal muscle cell proliferation	2/17	13/18800	5.96800554027695e-05	0.00084369343279017	0.000327427	PPARD/CFLAR	2
microglia	BP	GO:0019915	lipid storage	3/17	86/18800	6.00006558565685e-05	0.00084369343279017	0.000327427	PPARD/PPARG/NFKBIA	3
microglia	BP	GO:1904705	regulation of vascular associated smooth muscle cell proliferation	3/17	86/18800	6.00006558565685e-05	0.00084369343279017	0.000327427	PTEN/PPARG/JUN	3
microglia	BP	GO:1990874	vascular associated smooth muscle cell proliferation	3/17	87/18800	6.21088088525961e-05	0.000865742787745318	0.000335984	PTEN/PPARG/JUN	3
microglia	BP	GO:0106027	neuron projection organization	3/17	89/18800	6.64695855623243e-05	0.000918540910831085	0.000356475	PTEN/IGF1R/GSK3B	3
microglia	BP	GO:0014841	skeletal muscle satellite cell proliferation	2/17	14/18800	6.9589702756014e-05	0.000937414231242776	0.000363799	PPARD/CFLAR	2
microglia	BP	GO:0044849	estrous cycle	2/17	14/18800	6.9589702756014e-05	0.000937414231242776	0.000363799	IGF1R/TRPM2	2
microglia	BP	GO:0048681	negative regulation of axon regeneration	2/17	14/18800	6.9589702756014e-05	0.000937414231242776	0.000363799	PTEN/SPP1	2
microglia	BP	GO:0005996	monosaccharide metabolic process	4/17	261/18800	7.49338562866375e-05	0.001000991430229	0.000388473	PPARD/PIK3CA/MAPK14/GSK3B	4
microglia	BP	GO:1901655	cellular response to ketone	3/17	94/18800	7.82376544627226e-05	0.00103648727358466	0.000402248	IGF1R/CFLAR/SPP1	3
microglia	BP	GO:0014856	skeletal muscle cell proliferation	2/17	15/18800	8.02531094932265e-05	0.00104380810419243	0.00040509	PPARD/CFLAR	2
microglia	BP	GO:0070571	negative regulation of neuron projection regeneration	2/17	15/18800	8.02531094932265e-05	0.00104380810419243	0.00040509	PTEN/SPP1	2
microglia	BP	GO:0048661	positive regulation of smooth muscle cell proliferation	3/17	95/18800	8.0743733574461e-05	0.00104380810419243	0.00040509	PIK3CA/IGF1R/JUN	3
microglia	BP	GO:2001237	negative regulation of extrinsic apoptotic signaling pathway	3/17	97/18800	8.59123193540896e-05	0.00110173958339685	0.000427572	RAF1/CFLAR/GSK3B	3
microglia	BP	GO:0060291	long-term synaptic potentiation	3/17	98/18800	8.85758111566146e-05	0.00112688115304804	0.000437329	PTEN/GFAP/GSK3B	3
microglia	BP	GO:1903532	positive regulation of secretion by cell	4/17	274/18800	9.04595396183078e-05	0.00114178458274132	0.000443113	PPARD/PPARG/SPP1/TRPM2	4
microglia	BP	GO:0001666	response to hypoxia	4/17	286/18800	0.000106762269637328	0.00133703061116123	0.000518886	PPARD/PTEN/PPARG/CFLAR	4
microglia	BP	GO:0097284	hepatocyte apoptotic process	2/17	18/18800	0.000116753787712322	0.00145082419924692	0.000563048	IGF1R/CFLAR	2
microglia	BP	GO:0021761	limbic system development	3/17	108/18800	0.000118231084978648	0.00145788022477517	0.000565786	PTEN/IGF1R/GSK3B	3
microglia	BP	GO:0036293	response to decreased oxygen levels	4/17	299/18800	0.000126734361650323	0.00153723150854761	0.000596581	PPARD/PTEN/PPARG/CFLAR	4
microglia	BP	GO:0014066	regulation of phosphatidylinositol 3-kinase signaling	3/17	111/18800	0.000128242528473519	0.00153723150854761	0.000596581	PPARD/PTEN/IGF1R	3
microglia	BP	GO:0051047	positive regulation of secretion	4/17	300/18800	0.000128375484204756	0.00153723150854761	0.000596581	PPARD/PPARG/SPP1/TRPM2	4
microglia	BP	GO:0010885	regulation of cholesterol storage	2/17	19/18800	0.000130420140463179	0.00153723150854761	0.000596581	PPARD/PPARG	2
microglia	BP	GO:0051546	keratinocyte migration	2/17	19/18800	0.000130420140463179	0.00153723150854761	0.000596581	PPARD/PTEN	2
microglia	BP	GO:1902894	negative regulation of miRNA transcription	2/17	19/18800	0.000130420140463179	0.00153723150854761	0.000596581	PPARD/PPARG	2
microglia	BP	GO:0032495	response to muramyl dipeptide	2/17	20/18800	0.000144834213606629	0.00169466601760165	0.00065768	MAPK14/NFKBIA	2
microglia	BP	GO:1901214	regulation of neuron death	4/17	313/18800	0.00015114497623994	0.00175569128197553	0.000681363	PIK3CA/TRPM2/JUN/GSK3B	4
microglia	BP	GO:0090287	regulation of cellular response to growth factor stimulus	4/17	314/18800	0.000153009985143807	0.00176003659157758	0.000683049	HSPA5/PPARG/RUNX2/CFLAR	4
microglia	BP	GO:0008286	insulin receptor signaling pathway	3/17	118/18800	0.00015371498616398	0.00176003659157758	0.000683049	PIK3CA/IGF1R/GSK3B	3
microglia	BP	GO:0010878	cholesterol storage	2/17	21/18800	0.000159994803401868	0.00180613852009292	0.000700941	PPARD/PPARG	2
microglia	BP	GO:1901739	regulation of myoblast fusion	2/17	21/18800	0.000159994803401868	0.00180613852009292	0.000700941	MAPK14/CFLAR	2
microglia	BP	GO:0051101	regulation of DNA binding	3/17	121/18800	0.000165567668098613	0.00185597882490963	0.000720283	PPARG/NFKBIA/JUN	3
microglia	BP	GO:0070482	response to oxygen levels	4/17	324/18800	0.000172591736422905	0.00192128162142998	0.000745627	PPARD/PTEN/PPARG/CFLAR	4
microglia	BP	GO:0046697	decidualization	2/17	23/18800	0.000192550724731105	0.00212868146030318	0.000826116	PPARD/SPP1	2
microglia	BP	GO:0050714	positive regulation of protein secretion	3/17	128/18800	0.000195499908957098	0.00214648187711115	0.000833024	PPARD/PPARG/TRPM2	3
microglia	BP	GO:1901522	positive regulation of transcription from RNA polymerase II promoter involved in cellular response to chemical stimulus	2/17	24/18800	0.000209943655526371	0.00228938557693043	0.000888483	RUNX2/JUN	2
microglia	BP	GO:1903844	regulation of cellular response to transforming growth factor beta stimulus	3/17	133/18800	0.000218899686328351	0.00237092025124558	0.000920126	HSPA5/PPARG/CFLAR	3
microglia	BP	GO:0001889	liver development	3/17	134/18800	0.000223787501954381	0.00240759305793874	0.000934358	PIK3CA/CFLAR/JUN	3
microglia	BP	GO:0009306	protein secretion	4/17	350/18800	0.000231964477710665	0.00245696597416217	0.000953519	PPARD/PPARG/RAF1/TRPM2	4
microglia	BP	GO:0010977	negative regulation of neuron projection development	3/17	136/18800	0.000233774589560713	0.00245696597416217	0.000953519	PTEN/GFAP/SPP1	3
microglia	BP	GO:0032535	regulation of cellular component size	4/17	351/18800	0.000234507669399134	0.00245696597416217	0.000953519	PTEN/PIK3CA/SPP1/GSK3B	4
microglia	BP	GO:0035592	establishment of protein localization to extracellular region	4/17	351/18800	0.000234507669399134	0.00245696597416217	0.000953519	PPARD/PPARG/RAF1/TRPM2	4
microglia	BP	GO:0061008	hepaticobiliary system development	3/17	137/18800	0.000238874755465596	0.00248646904552825	0.000964969	PIK3CA/CFLAR/JUN	3
microglia	BP	GO:0071549	cellular response to dexamethasone stimulus	2/17	26/18800	0.000246953465627002	0.0025539768090328	0.000991168	IGF1R/CFLAR	2
microglia	BP	GO:0051384	response to glucocorticoid	3/17	139/18800	0.00024929055777402	0.00256162028276766	0.000994134	PIK3CA/IGF1R/CFLAR	3
microglia	BP	GO:0071692	protein localization to extracellular region	4/17	359/18800	0.00025558545781369	0.00260957636226334	0.00101275	PPARD/PPARG/RAF1/TRPM2	4
microglia	BP	GO:0045598	regulation of fat cell differentiation	3/17	142/18800	0.000265459582392683	0.0026874743866708	0.00104298	PPARD/PPARG/MAPK14	3
microglia	BP	GO:0010875	positive regulation of cholesterol efflux	2/17	27/18800	0.000266567952264914	0.0026874743866708	0.00104298	PPARG/NFKBIA	2
microglia	BP	GO:0051098	regulation of binding	4/17	366/18800	0.000275123373274228	0.0027370494891798	0.00106222	PPARG/NFKBIA/JUN/GSK3B	4
microglia	BP	GO:0033135	regulation of peptidyl-serine phosphorylation	3/17	144/18800	0.000276607621489162	0.0027370494891798	0.00106222	PTEN/PIK3CA/RAF1	3
microglia	BP	GO:0051592	response to calcium ion	3/17	144/18800	0.000276607621489162	0.0027370494891798	0.00106222	HSPA5/TRPM2/JUN	3
microglia	BP	GO:0031333	negative regulation of protein-containing complex assembly	3/17	145/18800	0.00028229356329098	0.0027741508433463	0.00107661	HSPA5/RAF1/GSK3B	3
microglia	BP	GO:0045862	positive regulation of proteolysis	4/17	369/18800	0.000283818302126508	0.0027741508433463	0.00107661	PTEN/PPARG/CFLAR/GSK3B	4
microglia	BP	GO:2001233	regulation of apoptotic signaling pathway	4/17	370/18800	0.00028676019796735	0.00278591877176765	0.00108118	PTEN/RAF1/CFLAR/GSK3B	4
microglia	BP	GO:0010976	positive regulation of neuron projection development	3/17	150/18800	0.000311859910718772	0.00301151468001321	0.00116873	HSPA5/IGF1R/CFLAR	3
microglia	BP	GO:0060142	regulation of syncytium formation by plasma membrane fusion	2/17	30/18800	0.000329835410708533	0.00315375549698183	0.00122394	MAPK14/CFLAR	2
microglia	BP	GO:0045834	positive regulation of lipid metabolic process	3/17	153/18800	0.000330524593570148	0.00315375549698183	0.00122394	PPARD/IGF1R/PPARG	3
microglia	BP	GO:0050770	regulation of axonogenesis	3/17	154/18800	0.000336902877491887	0.00319559356579582	0.00124017	PTEN/SPP1/GSK3B	3
microglia	BP	GO:0030099	myeloid cell differentiation	4/17	391/18800	0.000353763512304445	0.00333578182484721	0.00129458	PPARG/MAPK14/NFKBIA/JUN	4
microglia	BP	GO:0031960	response to corticosteroid	3/17	157/18800	0.000356513865132391	0.00334205687606563	0.00129701	PIK3CA/IGF1R/CFLAR	3
microglia	BP	GO:0050727	regulation of inflammatory response	4/17	394/18800	0.000364179187124636	0.00339406533116739	0.0013172	PPARD/PPARG/MAPK14/NFKBIA	4
microglia	BP	GO:0010743	regulation of macrophage derived foam cell differentiation	2/17	32/18800	0.000375688468726195	0.0034810902622433	0.00135097	PPARG/NFKBIA	2
microglia	BP	GO:0050806	positive regulation of synaptic transmission	3/17	161/18800	0.000383788630888206	0.00353570790410226	0.00137217	PTEN/GFAP/GSK3B	3
microglia	BP	GO:0043254	regulation of protein-containing complex assembly	4/17	401/18800	0.000389338883253535	0.00356634417060238	0.00138406	HSPA5/GFAP/RAF1/GSK3B	4
microglia	BP	GO:0050680	negative regulation of epithelial cell proliferation	3/17	163/18800	0.00039791648808107	0.00362000741278524	0.00140488	PPARD/PTEN/PPARG	3
microglia	BP	GO:0001893	maternal placenta development	2/17	33/18800	0.00039971385655832	0.00362000741278524	0.00140488	PPARD/SPP1	2
microglia	BP	GO:0051100	negative regulation of binding	3/17	165/18800	0.000412375780523336	0.00371369874257813	0.00144124	NFKBIA/JUN/GSK3B	3
microglia	BP	GO:1903034	regulation of response to wounding	3/17	166/18800	0.000419730752343121	0.00375881785478225	0.00145875	PTEN/IGF1R/SPP1	3
microglia	BP	GO:0021543	pallium development	3/17	169/18800	0.000442301923495994	0.00393894435202266	0.00152866	PTEN/IGF1R/GSK3B	3
microglia	BP	GO:0030224	monocyte differentiation	2/17	36/18800	0.00047617122382426	0.00421714072812315	0.00163662	PPARG/JUN	2
microglia	BP	GO:0007409	axonogenesis	4/17	430/18800	0.000507032479155512	0.00446578606640817	0.00173312	PTEN/IGF1R/SPP1/GSK3B	4
microglia	BP	GO:1903131	mononuclear cell differentiation	4/17	433/18800	0.000520509174315505	0.00450863134131617	0.00174975	PPARG/RUNX2/TRPM2/JUN	4
microglia	BP	GO:0008361	regulation of cell size	3/17	179/18800	0.000523147491880729	0.00450863134131617	0.00174975	PTEN/SPP1/GSK3B	3
microglia	BP	GO:0030073	insulin secretion	3/17	179/18800	0.000523147491880729	0.00450863134131617	0.00174975	PPARD/RAF1/TRPM2	3
microglia	BP	GO:0043409	negative regulation of MAPK cascade	3/17	179/18800	0.000523147491880729	0.00450863134131617	0.00174975	PTEN/IGF1R/PPARG	3
microglia	BP	GO:0010742	macrophage derived foam cell differentiation	2/17	38/18800	0.000530781972188817	0.00450974771500304	0.00175018	PPARG/NFKBIA	2
microglia	BP	GO:0043403	skeletal muscle tissue regeneration	2/17	38/18800	0.000530781972188817	0.00450974771500304	0.00175018	PPARD/CFLAR	2
microglia	BP	GO:0009266	response to temperature stimulus	3/17	180/18800	0.000531716979498175	0.00450974771500304	0.00175018	TRPM2/NFKBIA/GSK3B	3
microglia	BP	GO:0010721	negative regulation of cell development	3/17	181/18800	0.000540376237873798	0.00455906899637736	0.00176932	PTEN/SPP1/GSK3B	3
microglia	BP	GO:0050728	negative regulation of inflammatory response	3/17	182/18800	0.00054912566392	0.00459670981488822	0.00178393	PPARD/PPARG/MAPK14	3
microglia	BP	GO:0045936	negative regulation of phosphate metabolic process	4/17	440/18800	0.00055295069440228	0.00459670981488822	0.00178393	PTEN/PPARG/JUN/GSK3B	4
microglia	BP	GO:0010563	negative regulation of phosphorus metabolic process	4/17	441/18800	0.000557700536419815	0.00459670981488822	0.00178393	PTEN/PPARG/JUN/GSK3B	4
microglia	BP	GO:0045923	positive regulation of fatty acid metabolic process	2/17	39/18800	0.000559175554524768	0.00459670981488822	0.00178393	PPARD/PPARG	2
microglia	BP	GO:0090077	foam cell differentiation	2/17	39/18800	0.000559175554524768	0.00459670981488822	0.00178393	PPARG/NFKBIA	2
microglia	BP	GO:0010876	lipid localization	4/17	446/18800	0.000581889032191971	0.00475902101328433	0.00184692	PPARD/PPARG/SPP1/NFKBIA	4
microglia	BP	GO:0071392	cellular response to estradiol stimulus	2/17	40/18800	0.000588293037439098	0.00478697329449175	0.00185777	IGF1R/CFLAR	2
microglia	BP	GO:0051896	regulation of protein kinase B signaling	3/17	187/18800	0.000594239126821277	0.00481093596108337	0.00186707	PTEN/PIK3CA/IGF1R	3
microglia	BP	GO:0031345	negative regulation of cell projection organization	3/17	188/18800	0.000603537834632788	0.00486166406490633	0.00188675	PTEN/GFAP/SPP1	3
microglia	BP	GO:0051090	regulation of DNA-binding transcription factor activity	4/17	452/18800	0.000611895432445392	0.00490434189104981	0.00190332	PTEN/PPARG/CFLAR/NFKBIA	4
microglia	BP	GO:0071248	cellular response to metal ion	3/17	191/18800	0.000631993009110393	0.00504022285375104	0.00195605	HSPA5/TRPM2/JUN	3
microglia	BP	GO:1904706	negative regulation of vascular associated smooth muscle cell proliferation	2/17	42/18800	0.000648694998386971	0.00514781228917977	0.0019978	PTEN/PPARG	2
microglia	BP	GO:0120032	regulation of plasma membrane bounded cell projection assembly	3/17	195/18800	0.00067125212784447	0.00530057714746151	0.00205709	PIK3CA/TRPM2/GSK3B	3
microglia	BP	GO:0060491	regulation of cell projection assembly	3/17	197/18800	0.000691453836104979	0.00543333578076609	0.00210861	PIK3CA/TRPM2/GSK3B	3
microglia	BP	GO:0048167	regulation of synaptic plasticity	3/17	198/18800	0.000701699062330305	0.00548694437519746	0.00212942	PTEN/GFAP/GSK3B	3
microglia	BP	GO:0007179	transforming growth factor beta receptor signaling pathway	3/17	200/18800	0.000722480154237236	0.00562201789923441	0.00218184	HSPA5/PPARG/JUN	3
microglia	BP	GO:0006984	ER-nucleus signaling pathway	2/17	45/18800	0.0007446978125477	0.00565758575125101	0.00219564	HSPA5/GSK3B	2
microglia	BP	GO:0007520	myoblast fusion	2/17	45/18800	0.0007446978125477	0.00565758575125101	0.00219564	MAPK14/CFLAR	2
microglia	BP	GO:0060612	adipose tissue development	2/17	45/18800	0.0007446978125477	0.00565758575125101	0.00219564	PPARD/PIK3CA	2
microglia	BP	GO:1902895	positive regulation of miRNA transcription	2/17	45/18800	0.0007446978125477	0.00565758575125101	0.00219564	PPARG/JUN	2
microglia	BP	GO:1904646	cellular response to amyloid-beta	2/17	45/18800	0.0007446978125477	0.00565758575125101	0.00219564	IGF1R/GSK3B	2
microglia	BP	GO:0071383	cellular response to steroid hormone stimulus	3/17	203/18800	0.000754384045464837	0.00570413974000063	0.00221371	PPARD/IGF1R/CFLAR	3
microglia	BP	GO:0043281	regulation of cysteine-type endopeptidase activity involved in apoptotic process	3/17	204/18800	0.00076521544413491	0.00575887491525005	0.00223495	PPARG/RAF1/CFLAR	3
microglia	BP	GO:0007623	circadian rhythm	3/17	205/18800	0.000776145849219842	0.0058138401696234	0.00225628	PTEN/PPARG/GSK3B	3
microglia	BP	GO:0043618	regulation of transcription from RNA polymerase II promoter in response to stress	2/17	47/18800	0.000812285934050565	0.00605625280131654	0.00235036	HSPA5/JUN	2
microglia	BP	GO:1901215	negative regulation of neuron death	3/17	209/18800	0.000820864954898953	0.00609188204955103	0.00236419	PIK3CA/JUN/GSK3B	3
microglia	BP	GO:0002573	myeloid leukocyte differentiation	3/17	210/18800	0.000832295948990242	0.00614825071996017	0.00238606	PPARG/MAPK14/JUN	3
microglia	BP	GO:0006091	generation of precursor metabolites and energy	4/17	494/18800	0.000853753706463343	0.00627783115348963	0.00243635	PPARD/PIK3CA/PKM/GSK3B	4
microglia	BP	GO:0010656	negative regulation of muscle cell apoptotic process	2/17	49/18800	0.000882732143761889	0.00643190739295595	0.00249615	IGF1R/CFLAR	2
microglia	BP	GO:0060043	regulation of cardiac muscle cell proliferation	2/17	49/18800	0.000882732143761889	0.00643190739295595	0.00249615	PTEN/MAPK14	2
microglia	BP	GO:0060284	regulation of cell development	4/17	500/18800	0.000893124218103191	0.00647818154578921	0.00251411	PTEN/GFAP/SPP1/GSK3B	4
microglia	BP	GO:0030258	lipid modification	3/17	216/18800	0.00090302033990443	0.00649121795904395	0.00251916	PPARD/PTEN/MAPK14	3
microglia	BP	GO:0043491	protein kinase B signaling	3/17	216/18800	0.00090302033990443	0.00649121795904395	0.00251916	PTEN/PIK3CA/IGF1R	3
microglia	BP	GO:0071222	cellular response to lipopolysaccharide	3/17	217/18800	0.000915167532260505	0.00654753626085748	0.00254102	PPARD/MAPK14/NFKBIA	3
microglia	BP	GO:0031281	positive regulation of cyclase activity	2/17	50/18800	0.000919024116464712	0.00654753626085748	0.00254102	MAPK14/RAF1	2
microglia	BP	GO:0030072	peptide hormone secretion	3/17	220/18800	0.000952233106340169	0.00672435977737133	0.00260964	PPARD/RAF1/TRPM2	3
microglia	BP	GO:0070374	positive regulation of ERK1 and ERK2 cascade	3/17	220/18800	0.000952233106340169	0.00672435977737133	0.00260964	PTEN/CFLAR/JUN	3
microglia	BP	GO:0010874	regulation of cholesterol efflux	2/17	52/18800	0.000993739978602716	0.00692593559000067	0.00268787	PPARG/NFKBIA	2
microglia	BP	GO:0043392	negative regulation of DNA binding	2/17	52/18800	0.000993739978602716	0.00692593559000067	0.00268787	NFKBIA/JUN	2
microglia	BP	GO:1904036	negative regulation of epithelial cell apoptotic process	2/17	52/18800	0.000993739978602716	0.00692593559000067	0.00268787	IGF1R/CFLAR	2
microglia	BP	GO:0046777	protein autophosphorylation	3/17	224/18800	0.00100312318723728	0.0069610669659799	0.00270151	IGF1R/JUN/GSK3B	3
microglia	BP	GO:0002790	peptide secretion	3/17	225/18800	0.00101611044918712	0.00702079762951274	0.00272469	PPARD/RAF1/TRPM2	3
microglia	BP	GO:0043620	regulation of DNA-templated transcription in response to stress	2/17	53/18800	0.00103216154439013	0.0070707476737495	0.00274407	HSPA5/JUN	2
microglia	BP	GO:0071385	cellular response to glucocorticoid stimulus	2/17	53/18800	0.00103216154439013	0.0070707476737495	0.00274407	IGF1R/CFLAR	2
microglia	BP	GO:0071219	cellular response to molecule of bacterial origin	3/17	229/18800	0.00106912901184115	0.0072154576339511	0.00280023	PPARD/MAPK14/NFKBIA	3
microglia	BP	GO:2000116	regulation of cysteine-type endopeptidase activity	3/17	229/18800	0.00106912901184115	0.0072154576339511	0.00280023	PPARG/RAF1/CFLAR	3
microglia	BP	GO:0014888	striated muscle adaptation	2/17	54/18800	0.00107129065307571	0.0072154576339511	0.00280023	PPARG/CFLAR	2
microglia	BP	GO:0045661	regulation of myoblast differentiation	2/17	54/18800	0.00107129065307571	0.0072154576339511	0.00280023	PPARD/MAPK14	2
microglia	BP	GO:2001234	negative regulation of apoptotic signaling pathway	3/17	230/18800	0.00108265277677394	0.00726147448187712	0.00281809	RAF1/CFLAR/GSK3B	3
microglia	BP	GO:1904645	response to amyloid-beta	2/17	55/18800	0.00111112614611034	0.00742139671756196	0.00288016	IGF1R/GSK3B	2
microglia	BP	GO:0045444	fat cell differentiation	3/17	237/18800	0.00118037206325505	0.007851188453933	0.00304695	PPARD/PPARG/MAPK14	3
microglia	BP	GO:0007566	embryo implantation	2/17	57/18800	0.00119291165756766	0.00790180738463207	0.0030666	PPARD/SPP1	2
microglia	BP	GO:0032984	protein-containing complex disassembly	3/17	239/18800	0.0012092834323012	0.00797728947316387	0.00309589	PIK3CA/IGF1R/GSK3B	3
microglia	BP	GO:0060038	cardiac muscle cell proliferation	2/17	58/18800	0.00123485936542588	0.00807130361427529	0.00313238	PTEN/MAPK14	2
microglia	BP	GO:0060135	maternal process involved in female pregnancy	2/17	58/18800	0.00123485936542588	0.00807130361427529	0.00313238	PPARD/SPP1	2
microglia	BP	GO:0051402	neuron apoptotic process	3/17	241/18800	0.00123864047979521	0.00807130361427529	0.00313238	PIK3CA/HSPA5/JUN	3
microglia	BP	GO:0000768	syncytium formation by plasma membrane fusion	2/17	59/18800	0.00127750883650175	0.00819138665964921	0.00317898	MAPK14/CFLAR	2
microglia	BP	GO:0035773	insulin secretion involved in cellular response to glucose stimulus	2/17	59/18800	0.00127750883650175	0.00819138665964921	0.00317898	PPARD/RAF1	2
microglia	BP	GO:0071384	cellular response to corticosteroid stimulus	2/17	59/18800	0.00127750883650175	0.00819138665964921	0.00317898	IGF1R/CFLAR	2
microglia	BP	GO:0140253	cell-cell fusion	2/17	59/18800	0.00127750883650175	0.00819138665964921	0.00317898	MAPK14/CFLAR	2
microglia	BP	GO:0045926	negative regulation of growth	3/17	245/18800	0.00129870235710385	0.00829410310134452	0.00321884	PPARD/PTEN/SPP1	3
microglia	BP	GO:0046824	positive regulation of nucleocytoplasmic transport	2/17	60/18800	0.00132085891877263	0.00840213034441478	0.00326077	MAPK14/GSK3B	2
microglia	BP	GO:0021537	telencephalon development	3/17	247/18800	0.00132941252156665	0.00842311569988672	0.00326891	PTEN/IGF1R/GSK3B	3
microglia	BP	GO:0015833	peptide transport	3/17	249/18800	0.00136057903386712	0.00858664642239762	0.00333238	PPARD/RAF1/TRPM2	3
microglia	BP	GO:0050708	regulation of protein secretion	3/17	252/18800	0.00140819020057778	0.00882687138066973	0.0034256	PPARD/PPARG/TRPM2	3
microglia	BP	GO:0031663	lipopolysaccharide-mediated signaling pathway	2/17	62/18800	0.00140965631531594	0.00882687138066973	0.0034256	MAPK14/NFKBIA	2
microglia	BP	GO:0006949	syncytium formation	2/17	63/18800	0.00145510133204655	0.00907598223840707	0.00352228	MAPK14/CFLAR	2
microglia	BP	GO:0034976	response to endoplasmic reticulum stress	3/17	257/18800	0.00148986090507662	0.00925677143735592	0.00359244	HSPA5/JUN/GSK3B	3
microglia	BP	GO:0050771	negative regulation of axonogenesis	2/17	64/18800	0.0015012423648861	0.00928843408531643	0.00360473	PTEN/SPP1	2
microglia	BP	GO:0008654	phospholipid biosynthetic process	3/17	258/18800	0.00150654576555351	0.00928843408531643	0.00360473	PPARD/PTEN/PIK3CA	3
microglia	BP	GO:0014823	response to activity	2/17	65/18800	0.00154807826830819	0.00950792898121848	0.00368991	PPARD/PIK3CA	2
microglia	BP	GO:0030522	intracellular receptor signaling pathway	3/17	264/18800	0.00160913678482271	0.00984521475599546	0.00382081	PPARD/PPARG/NFKBIA	3
microglia	BP	GO:0051091	positive regulation of DNA-binding transcription factor activity	3/17	265/18800	0.00162665188200916	0.00991453599566803	0.00384771	PTEN/PPARG/CFLAR	3
microglia	BP	GO:0032024	positive regulation of insulin secretion	2/17	67/18800	0.00164383011127116	0.00994362139006669	0.003859	PPARD/TRPM2	2
microglia	BP	GO:0055021	regulation of cardiac muscle tissue growth	2/17	67/18800	0.00164383011127116	0.00994362139006669	0.003859	PTEN/MAPK14	2
microglia	BP	GO:0031348	negative regulation of defense response	3/17	268/18800	0.00167991760698721	0.0101237140000019	0.00392889	PPARD/PPARG/MAPK14	3
microglia	BP	GO:0051348	negative regulation of transferase activity	3/17	270/18800	0.00171603155952212	0.0103026164416253	0.00399832	PTEN/PPARG/GSK3B	3
microglia	BP	GO:0033344	cholesterol efflux	2/17	69/18800	0.00174234772261491	0.0104215798483273	0.00404449	PPARG/NFKBIA	2
microglia	BP	GO:0043542	endothelial cell migration	3/17	279/18800	0.00188458967980201	0.0112304730733183	0.00435841	PTEN/PIK3CA/PPARG	3
microglia	BP	GO:0042246	tissue regeneration	2/17	72/18800	0.00189529001613196	0.0112524070217019	0.00436693	PPARD/CFLAR	2
microglia	BP	GO:0035924	cellular response to vascular endothelial growth factor stimulus	2/17	74/18800	0.00200068220384236	0.011790785193968	0.00457586	PIK3CA/MAPK14	2
microglia	BP	GO:0060420	regulation of heart growth	2/17	74/18800	0.00200068220384236	0.011790785193968	0.00457586	PTEN/MAPK14	2
microglia	BP	GO:0042886	amide transport	3/17	287/18800	0.00204285397822368	0.0119952195131596	0.0046552	PPARD/RAF1/TRPM2	3
microglia	BP	GO:0071479	cellular response to ionizing radiation	2/17	75/18800	0.00205440409357864	0.0120190137299509	0.00466444	HSPA5/MAPK14	2
microglia	BP	GO:0010632	regulation of epithelial cell migration	3/17	290/18800	0.00210428247272226	0.0122660538319047	0.00476031	PTEN/PPARG/JUN	3
microglia	BP	GO:0006919	activation of cysteine-type endopeptidase activity involved in apoptotic process	2/17	77/18800	0.00216389380810908	0.0125678325159379	0.00487743	PPARG/CFLAR	2
microglia	BP	GO:0034504	protein localization to nucleus	3/17	294/18800	0.0021879718762985	0.0126618011469548	0.00491389	MAPK14/NFKBIA/GSK3B	3
microglia	BP	GO:0031279	regulation of cyclase activity	2/17	78/18800	0.00221965937406812	0.0127989711389611	0.00496713	MAPK14/RAF1	2
microglia	BP	GO:0021700	developmental maturation	3/17	296/18800	0.00223058665011979	0.0128158795704015	0.00497369	PTEN/PPARG/RUNX2	3
microglia	BP	GO:0014068	positive regulation of phosphatidylinositol 3-kinase signaling	2/17	79/18800	0.00227610390873381	0.0130306948775011	0.00505706	PPARD/IGF1R	2
microglia	BP	GO:0097061	dendritic spine organization	2/17	80/18800	0.00233322628588813	0.0133101841148707	0.00516552	PTEN/IGF1R	2
microglia	BP	GO:0030512	negative regulation of transforming growth factor beta receptor signaling pathway	2/17	81/18800	0.00239102538059069	0.0135435112547239	0.00525608	HSPA5/PPARG	2
microglia	BP	GO:0045445	myoblast differentiation	2/17	81/18800	0.00239102538059069	0.0135435112547239	0.00525608	PPARD/MAPK14	2
microglia	BP	GO:0006913	nucleocytoplasmic transport	3/17	308/18800	0.00249719901805633	0.0140456492138396	0.00545095	MAPK14/NFKBIA/GSK3B	3
microglia	BP	GO:0051169	nuclear transport	3/17	308/18800	0.00249719901805633	0.0140456492138396	0.00545095	MAPK14/NFKBIA/GSK3B	3
microglia	BP	GO:0060395	SMAD protein signal transduction	2/17	83/18800	0.0025086492292602	0.0140607157849794	0.0054568	PPARG/JUN	2
microglia	BP	GO:0070372	regulation of ERK1 and ERK2 cascade	3/17	311/18800	0.00256681361669813	0.0143365931274115	0.00556386	PTEN/CFLAR/JUN	3
microglia	BP	GO:0060070	canonical Wnt signaling pathway	3/17	313/18800	0.00261388923379698	0.0145488348672797	0.00564623	PTEN/MAPK14/GSK3B	3
microglia	BP	GO:0034103	regulation of tissue remodeling	2/17	86/18800	0.00269013233370054	0.0149213914564774	0.00579081	PPARG/SPP1	2
microglia	BP	GO:0015849	organic acid transport	3/17	318/18800	0.00273392459316044	0.0151075513516934	0.00586306	PPARD/PPARG/GFAP	3
microglia	BP	GO:0055017	cardiac muscle tissue growth	2/17	87/18800	0.00275196818134402	0.0151075513516934	0.00586306	PTEN/MAPK14	2
microglia	BP	GO:1901216	positive regulation of neuron death	2/17	87/18800	0.00275196818134402	0.0151075513516934	0.00586306	TRPM2/GSK3B	2
microglia	BP	GO:0045104	intermediate filament cytoskeleton organization	2/17	88/18800	0.00281447290762788	0.0153979524605034	0.00597576	GFAP/RAF1	2
microglia	BP	GO:0008202	steroid metabolic process	3/17	323/18800	0.00285733845664509	0.0155792977755173	0.00604614	PPARD/IGF1R/SPP1	3
microglia	BP	GO:0045103	intermediate filament-based process	2/17	89/18800	0.00287764539779031	0.0156368324496877	0.00606847	GFAP/RAF1	2
microglia	BP	GO:0090277	positive regulation of peptide hormone secretion	2/17	91/18800	0.00300598921703738	0.0162242448313499	0.00629644	PPARD/TRPM2	2
microglia	BP	GO:0090398	cellular senescence	2/17	91/18800	0.00300598921703738	0.0162242448313499	0.00629644	IGF1R/MAPK14	2
microglia	BP	GO:0019217	regulation of fatty acid metabolic process	2/17	92/18800	0.00307115832292864	0.0164651063266041	0.00638991	PPARD/PPARG	2
microglia	BP	GO:1903035	negative regulation of response to wounding	2/17	92/18800	0.00307115832292864	0.0164651063266041	0.00638991	PTEN/SPP1	2
microglia	BP	GO:0062197	cellular response to chemical stress	3/17	332/18800	0.00308810166167562	0.0165007565455534	0.00640375	PIK3CA/TRPM2/JUN	3
microglia	BP	GO:0032496	response to lipopolysaccharide	3/17	333/18800	0.00311443244151986	0.016586163467629	0.00643689	PPARD/MAPK14/NFKBIA	3
microglia	BP	GO:0002793	positive regulation of peptide secretion	2/17	93/18800	0.00313699074630932	0.0165960269515968	0.00644072	PPARD/TRPM2	2
microglia	BP	GO:0045185	maintenance of protein location	2/17	93/18800	0.00313699074630932	0.0165960269515968	0.00644072	HSPA5/NFKBIA	2
microglia	BP	GO:0070371	ERK1 and ERK2 cascade	3/17	335/18800	0.00316751130114181	0.0167023704464813	0.00648199	PTEN/CFLAR/JUN	3
microglia	BP	GO:0010506	regulation of autophagy	3/17	336/18800	0.00319425988303762	0.0167816570657564	0.00651276	PIK3CA/GFAP/GSK3B	3
microglia	BP	GO:1904035	regulation of epithelial cell apoptotic process	2/17	94/18800	0.00320348537874077	0.0167816570657564	0.00651276	IGF1R/CFLAR	2
microglia	BP	GO:0060079	excitatory postsynaptic potential	2/17	95/18800	0.00327064111304542	0.0170466831397908	0.00661562	PTEN/GSK3B	2
microglia	BP	GO:0019216	regulation of lipid metabolic process	3/17	339/18800	0.00327534523209955	0.0170466831397908	0.00661562	PPARD/IGF1R/PPARG	3
microglia	BP	GO:0001933	negative regulation of protein phosphorylation	3/17	341/18800	0.00333010428003094	0.0172630526445772	0.00669959	PTEN/PPARG/JUN	3
microglia	BP	GO:0060419	heart growth	2/17	96/18800	0.00333845684330563	0.0172630526445772	0.00669959	PTEN/MAPK14	2
microglia	BP	GO:0062012	regulation of small molecule metabolic process	3/17	342/18800	0.00335769518789351	0.0173067054218434	0.00671653	PPARD/PPARG/GSK3B	3
microglia	BP	GO:0030336	negative regulation of cell migration	3/17	346/18800	0.00346947374701719	0.0178023335160591	0.00690887	PPARD/PTEN/PPARG	3
microglia	BP	GO:0021549	cerebellum development	2/17	98/18800	0.00347606387431472	0.0178023335160591	0.00690887	HSPA5/IGF1R	2
microglia	BP	GO:0015908	fatty acid transport	2/17	99/18800	0.00354585296951732	0.0180444517782104	0.00700284	PPARD/PPARG	2
microglia	BP	GO:0051588	regulation of neurotransmitter transport	2/17	99/18800	0.00354585296951732	0.0180444517782104	0.00700284	GFAP/GSK3B	2
microglia	BP	GO:0010038	response to metal ion	3/17	351/18800	0.00361239867329525	0.0182868300702767	0.0070969	HSPA5/TRPM2/JUN	3
microglia	BP	GO:0019080	viral gene expression	2/17	100/18800	0.00361629764958061	0.0182868300702767	0.0070969	JUN/GSK3B	2
microglia	BP	GO:0046620	regulation of organ growth	2/17	101/18800	0.00368739681486892	0.0185294579756579	0.00719106	PTEN/MAPK14	2
microglia	BP	GO:0002237	response to molecule of bacterial origin	3/17	354/18800	0.00369987269778197	0.0185340497954516	0.00719284	PPARD/MAPK14/NFKBIA	3
microglia	BP	GO:0046822	regulation of nucleocytoplasmic transport	2/17	104/18800	0.0039046102445136	0.0193999421348339	0.00752889	MAPK14/GSK3B	2
microglia	BP	GO:0050767	regulation of neurogenesis	3/17	361/18800	0.0039090338799447	0.0193999421348339	0.00752889	PTEN/GFAP/SPP1	3
microglia	BP	GO:2000146	negative regulation of cell motility	3/17	361/18800	0.0039090338799447	0.0193999421348339	0.00752889	PPARD/PTEN/PPARG	3
microglia	BP	GO:0031589	cell-substrate adhesion	3/17	364/18800	0.00400085592368317	0.01979435816563	0.00768196	PPARD/PTEN/GSK3B	3
microglia	BP	GO:0019395	fatty acid oxidation	2/17	106/18800	0.00405267152007392	0.0199277068916518	0.00773371	PPARD/MAPK14	2
microglia	BP	GO:0120034	positive regulation of plasma membrane bounded cell projection assembly	2/17	106/18800	0.00405267152007392	0.0199277068916518	0.00773371	PIK3CA/GSK3B	2
microglia	BP	GO:0022037	metencephalon development	2/17	107/18800	0.004127674574443	0.0201727510452199	0.00782881	HSPA5/IGF1R	2
microglia	BP	GO:0033138	positive regulation of peptidyl-serine phosphorylation	2/17	107/18800	0.004127674574443	0.0201727510452199	0.00782881	PIK3CA/RAF1	2
microglia	BP	GO:0051271	negative regulation of cellular component movement	3/17	369/18800	0.0041568241765949	0.0202534624774517	0.00786013	PPARD/PTEN/PPARG	3
microglia	BP	GO:0061387	regulation of extent of cell growth	2/17	108/18800	0.0042033244516027	0.0203562812565533	0.00790003	SPP1/GSK3B	2
microglia	BP	GO:2000060	positive regulation of ubiquitin-dependent protein catabolic process	2/17	108/18800	0.0042033244516027	0.0203562812565533	0.00790003	PTEN/GSK3B	2
microglia	BP	GO:0009408	response to heat	2/17	109/18800	0.00427962006190772	0.0206633462627653	0.0080192	TRPM2/GSK3B	2
microglia	BP	GO:0002062	chondrocyte differentiation	2/17	110/18800	0.00435656031695627	0.0209716702344772	0.00813886	RUNX2/MAPK14	2
microglia	BP	GO:0030900	forebrain development	3/17	376/18800	0.0043813828553641	0.0210280141231996	0.00816072	PTEN/IGF1R/GSK3B	3
microglia	BP	GO:0048640	negative regulation of developmental growth	2/17	111/18800	0.00443414412958898	0.0212177105663616	0.00823434	PTEN/SPP1	2
microglia	BP	GO:0010633	negative regulation of epithelial cell migration	2/17	112/18800	0.00451237041388769	0.0214638865681364	0.00832988	PTEN/PPARG	2
microglia	BP	GO:0034440	lipid oxidation	2/17	112/18800	0.00451237041388769	0.0214638865681364	0.00832988	PPARD/MAPK14	2
microglia	BP	GO:0042326	negative regulation of phosphorylation	3/17	382/18800	0.00457967310144264	0.0217101907095411	0.00842547	PTEN/PPARG/JUN	3
microglia	BP	GO:1904659	glucose transmembrane transport	2/17	113/18800	0.00459123808517433	0.0217101907095411	0.00842547	PPARD/MAPK14	2
microglia	BP	GO:0043200	response to amino acid	2/17	114/18800	0.0046707460600097	0.0220211939241045	0.00854616	PIK3CA/IGF1R	2
microglia	BP	GO:0021782	glial cell development	2/17	115/18800	0.00475089325619237	0.0222680757008081	0.00864198	PTEN/GFAP	2
microglia	BP	GO:0090288	negative regulation of cellular response to growth factor stimulus	2/17	115/18800	0.00475089325619237	0.0222680757008081	0.00864198	PPARG/CFLAR	2
microglia	BP	GO:0006644	phospholipid metabolic process	3/17	388/18800	0.00478337663539311	0.0223549642756127	0.0086757	PPARD/PTEN/PIK3CA	3
microglia	BP	GO:0006869	lipid transport	3/17	391/18800	0.00488727258322331	0.022762141291708	0.00883372	PPARD/PPARG/SPP1	3
microglia	BP	GO:0008645	hexose transmembrane transport	2/17	117/18800	0.00491310098997565	0.022762141291708	0.00883372	PPARD/MAPK14	2
microglia	BP	GO:0042752	regulation of circadian rhythm	2/17	117/18800	0.00491310098997565	0.022762141291708	0.00883372	PPARG/GSK3B	2
microglia	BP	GO:0030278	regulation of ossification	2/17	118/18800	0.00499515936935171	0.0228778299116308	0.00887861	RUNX2/MAPK14	2
microglia	BP	GO:0032368	regulation of lipid transport	2/17	118/18800	0.00499515936935171	0.0228778299116308	0.00887861	PPARG/SPP1	2
microglia	BP	GO:0043500	muscle adaptation	2/17	118/18800	0.00499515936935171	0.0228778299116308	0.00887861	PPARG/CFLAR	2
microglia	BP	GO:1904019	epithelial cell apoptotic process	2/17	118/18800	0.00499515936935171	0.0228778299116308	0.00887861	IGF1R/CFLAR	2
microglia	BP	GO:0006631	fatty acid metabolic process	3/17	395/18800	0.00502793294192382	0.0228970923463179	0.00888609	PPARD/PPARG/MAPK14	3
microglia	BP	GO:0042176	regulation of protein catabolic process	3/17	395/18800	0.00502793294192382	0.0228970923463179	0.00888609	PTEN/GFAP/GSK3B	3
microglia	BP	GO:0040013	negative regulation of locomotion	3/17	396/18800	0.0050634801820643	0.0229290078979119	0.00889848	PPARD/PTEN/PPARG	3
microglia	BP	GO:0015749	monosaccharide transmembrane transport	2/17	119/18800	0.00507785265362366	0.0229290078979119	0.00889848	PPARD/MAPK14	2
microglia	BP	GO:0051897	positive regulation of protein kinase B signaling	2/17	119/18800	0.00507785265362366	0.0229290078979119	0.00889848	PIK3CA/IGF1R	2
microglia	BP	GO:0031398	positive regulation of protein ubiquitination	2/17	121/18800	0.00524513963396588	0.0236178618911441	0.00916581	PTEN/HSPA5	2
microglia	BP	GO:0014902	myotube differentiation	2/17	122/18800	0.00532973118166735	0.0238646901793652	0.0092616	MAPK14/CFLAR	2
microglia	BP	GO:0071901	negative regulation of protein serine/threonine kinase activity	2/17	122/18800	0.00532973118166735	0.0238646901793652	0.0092616	PTEN/PPARG	2
microglia	BP	GO:0060537	muscle tissue development	3/17	405/18800	0.00539032619941347	0.0240447927979288	0.0093315	PTEN/MAPK14/CFLAR	3
microglia	BP	GO:0001952	regulation of cell-matrix adhesion	2/17	123/18800	0.00541495333752482	0.0240447927979288	0.0093315	PTEN/GSK3B	2
microglia	BP	GO:0032355	response to estradiol	2/17	123/18800	0.00541495333752482	0.0240447927979288	0.0093315	IGF1R/CFLAR	2
microglia	BP	GO:0043244	regulation of protein-containing complex disassembly	2/17	125/18800	0.00558728519047923	0.0246733282653945	0.00957543	PIK3CA/IGF1R	2
microglia	BP	GO:0043280	positive regulation of cysteine-type endopeptidase activity involved in apoptotic process	2/17	125/18800	0.00558728519047923	0.0246733282653945	0.00957543	PPARG/CFLAR	2
microglia	BP	GO:0001558	regulation of cell growth	3/17	415/18800	0.00576822336640688	0.0254023682866765	0.00985836	PPARD/SPP1/GSK3B	3
microglia	MF	GO:0140297	DNA-binding transcription factor binding	7/17	470/18410	1.05353249505418e-07	1.50655146792747e-05	5.9885e-06	PPARD/PPARG/RUNX2/MAPK14/NFKBIA/JUN/GSK3B	7
microglia	MF	GO:0061629	RNA polymerase II-specific DNA-binding transcription factor binding	6/17	348/18410	4.53602901818325e-07	3.24326074800102e-05	1.28919e-05	PPARD/PPARG/MAPK14/NFKBIA/JUN/GSK3B	6
microglia	MF	GO:0051059	NF-kappaB binding	3/17	31/18410	2.89307809799172e-06	0.000137903389337605	5.48162e-05	PPARD/NFKBIA/GSK3B	3
microglia	MF	GO:0043560	insulin receptor substrate binding	2/17	10/18410	3.59591719560282e-05	0.00113498775330865	0.000451154	PIK3CA/IGF1R	2
microglia	MF	GO:0004712	protein serine/threonine/tyrosine kinase activity	5/17	446/18410	3.96848864793235e-05	0.00113498775330865	0.000451154	PIK3CA/IGF1R/MAPK14/RAF1/GSK3B	5
microglia	MF	GO:0036041	long-chain fatty acid binding	2/17	15/18410	8.36771411868197e-05	0.00199430519828587	0.000792731	PPARD/PPARG	2
microglia	MF	GO:0031625	ubiquitin protein ligase binding	4/17	298/18410	0.000135581139003912	0.00276972898250848	0.00110096	HSPA5/NFKBIA/JUN/GSK3B	4
microglia	MF	GO:0044389	ubiquitin-like protein ligase binding	4/17	317/18410	0.00017195146215399	0.00307363238600257	0.00122176	HSPA5/NFKBIA/JUN/GSK3B	4
microglia	MF	GO:0070412	R-SMAD binding	2/17	24/18410	0.000218878792758489	0.00347774081827377	0.00138239	PPARG/JUN	2
microglia	MF	GO:0002020	protease binding	3/17	136/18410	0.000248557295005956	0.00355436931858517	0.00141285	PTEN/CFLAR/GSK3B	3
microglia	MF	GO:0106310	protein serine kinase activity	4/17	360/18410	0.000279729791580145	0.00363648729054189	0.00144549	PIK3CA/MAPK14/RAF1/GSK3B	4
microglia	MF	GO:0004674	protein serine/threonine kinase activity	4/17	430/18410	0.00054861254821501	0.00653763286622887	0.00259869	PIK3CA/MAPK14/RAF1/GSK3B	4
microglia	MF	GO:0005504	fatty acid binding	2/17	49/18410	0.000920042023560251	0.00987373825866193	0.00392478	PPARD/PPARG	2
microglia	MF	GO:0004879	nuclear receptor activity	2/17	52/18410	0.00103570681034915	0.00987373825866193	0.00392478	PPARD/PPARG	2
microglia	MF	GO:0098531	ligand-activated transcription factor activity	2/17	52/18410	0.00103570681034915	0.00987373825866193	0.00392478	PPARD/PPARG	2
microglia	MF	GO:0046332	SMAD binding	2/17	78/18410	0.00231272243227236	0.0206699567384342	0.00821625	PPARG/JUN	2
microglia	MF	GO:0033293	monocarboxylic acid binding	2/17	81/18410	0.0024911893391334	0.0209552985585927	0.00832967	PPARD/PPARG	2
microglia	MF	GO:0042277	peptide binding	3/17	322/18410	0.00300485237067664	0.0220548873604092	0.00876676	IGF1R/PPARG/NFKBIA	3
microglia	MF	GO:0001217	DNA-binding transcription repressor activity	3/17	325/18410	0.00308459963082646	0.0220548873604092	0.00876676	PPARD/PPARG/JUN	3
