# Supplementary material for: Uncovering the pharmacology of Ginkgo biloba folium in the cell-type-specific targets of Parkinson’s disease
Source: Front Pharmacol. 2022 Sep 29;13:1007556. doi: 10.3389/fphar.2022.1007556 (PMC9556873; doi:10.3389/fphar.2022.1007556)
Supplement: Supplementary file 9 [file Table6.XLS]

## Sheet: Sheet1
Table 6. Molecular docking results of MAPK14 with Ginkgolide A and Ginkgolide J.
Compound	Ginkgolide A	Ginkgolide J
Energy	69.4155	171.782
SimpleFitness	69.4155	171.782
FullFitness	-1506.26	-1401.03
InterFull	-39.5084	-41.706
IntraFull	111.153	219.345
solvFull	-1892.04	-1892.47
surfFull	314.131	313.797
extraFull	0	0
deltaGcompsolvpol	-1892.04	-1892.47
deltaGcompsolvnonpol	314.131	313.797
deltaGprotsolvpol	-1898.06	-1898.06
deltaGprotsolvnonpol	312.043	312.043
deltaGligsolvpol	-22.37	-24.6927
deltaGligsolvnonpol	13.3511	13.652
deltaGvdw	-39.5084	-41.706
deltaGelec	0	0
deltaG	-7.05551	-7.20763
Cluster	8	0
ClusterRank	6	4
